# Supplementary material
Source: PubMed Central journal article supplement (PMC6777224)
Supplement: jamapsychiatry-76-1241-s001.pdf [file jamapsychiatry-76-1241-s001.pdf]

## Supplementary Online Content

Dragioti E, Solmi M, Favaro A, et al. Association of antidepressant use with adverse health outcomes: a systematic umbrella review. *JAMA Psychiatry*. Published online October 2, 2019. doi:10.1001/jamapsychiatry.2019.2859

**eAppendix 1.** PRISMA Checklist and MOOSE Checklist

**eAppendix 2.** Search Strings for PubMed

**eTable 1.** Articles Excluded After Full-Text Revision, With Reasons

**eTable 2.** Characteristics of Meta-analyses of Observational Studies Studying the Association Between Antidepressants and Risk of Any Adverse Health Outcome

**eTable 3.** Suggestive Evidence (Class III) for the Association of Antidepressant Use and Risk of Adverse Health Outcomes in Meta-analyses of Observational Studies

**eTable 4.** Weak Evidence (Class IV) for the Association of Antidepressant Use and Risk of Adverse Health Outcomes in Meta-analyses of Observational Studies

**eTable 5.** No Evidence (Nonsignificant Associations,  $P > 0.05$ ) for the Association of Antidepressant Use and Risk of Adverse Health Outcomes in Meta-analyses of Observational Studies

**eTable 6.** Sensitivity Analysis Results of Nonselected Meta-analyses Due to Overlap

**eTable 7.** List of Covariates Used for the Sensitivity Analysis Limited to Studies Adjusted for Covariates

**eMethods.** Supplementary Methods

**eResults.** Supplementary Results

**eReferences.**

This supplementary material has been provided by the authors to give readers additional information about their work.

## eAppendix 1. PRISMA Checklist and MOOSE Checklist

### PRISMA 2009 Checklist

| Section/topic             | # | Checklist item                                                                                                                                                                                                                                                                                              | Reported on page # |
|---------------------------|---|-------------------------------------------------------------------------------------------------------------------------------------------------------------------------------------------------------------------------------------------------------------------------------------------------------------|--------------------|
| <b>TITLE</b>              |   |                                                                                                                                                                                                                                                                                                             |                    |
| Title                     | 1 | Identify the report as a systematic review, meta-analysis, or both.                                                                                                                                                                                                                                         | 1                  |
| <b>ABSTRACT</b>           |   |                                                                                                                                                                                                                                                                                                             |                    |
| Structured summary        | 2 | Provide a structured summary including, as applicable: background; objectives; data sources; study eligibility criteria, participants, and interventions; study appraisal and synthesis methods; results; limitations; conclusions and implications of key findings; systematic review registration number. | 3–4                |
| <b>INTRODUCTION</b>       |   |                                                                                                                                                                                                                                                                                                             |                    |
| Rationale                 | 3 | Describe the rationale for the review in the context of what is already known.                                                                                                                                                                                                                              | 6                  |
| Objectives                | 4 | Provide an explicit statement of questions being addressed with reference to participants, interventions, comparisons, outcomes, and study design (PICOS).                                                                                                                                                  | 7                  |
| <b>METHODS</b>            |   |                                                                                                                                                                                                                                                                                                             |                    |
| Protocol and registration | 5 | Indicate if a review protocol exists, if and where it can be accessed (e.g., Web address), and, if available, provide registration information including registration number.                                                                                                                               | 7                  |
| Eligibility criteria      | 6 | Specify study characteristics (e.g., PICOS, length of follow-up) and report characteristics (e.g., years considered, language, publication status) used as criteria for eligibility, giving rationale.                                                                                                      | 7-8                |
| Information sources       | 7 | Describe all information sources (e.g., databases with dates of coverage, contact with study authors to identify additional studies) in the search and date last searched.                                                                                                                                  | 7                  |
| Search                    | 8 | Present full electronic search strategy for at least one database, including any limits used, such that it could be repeated.                                                                                                                                                                               | eAppendix 2        |
| Study selection           | 9 | State the process for selecting studies (i.e., screening, eligibility, included in systematic review, and, if applicable, included in the meta-analysis).                                                                                                                                                   | 8                  |

|                                    |    |                                                                                                                                                                                                                        |                    |
|------------------------------------|----|------------------------------------------------------------------------------------------------------------------------------------------------------------------------------------------------------------------------|--------------------|
|                                    |    |                                                                                                                                                                                                                        | Supplement methods |
| Data collection process            | 10 | Describe method of data extraction from reports (e.g., piloted forms, independently, in duplicate) and any processes for obtaining and confirming data from investigators.                                             | 9                  |
| Data items                         | 11 | List and define all variables for which data were sought (e.g., PICOS, funding sources) and any assumptions and simplifications made.                                                                                  | 9                  |
| Risk of bias in individual studies | 12 | Describe methods used for assessing risk of bias of individual studies (including specification of whether this was done at the study or outcome level), and how this information is to be used in any data synthesis. | 9                  |
| Summary measures                   | 13 | State the principal summary measures (e.g., risk ratio, difference in means).                                                                                                                                          | 9                  |
| Synthesis of results               | 14 | Describe the methods of handling data and combining results of studies, if done, including measures of consistency (e.g., $I^2$ ) for each meta-analysis.                                                              | 9-10               |

Page 1 of 2

| Section/topic                 | #  | Checklist item                                                                                                                                                                                           | Reported on page #         |
|-------------------------------|----|----------------------------------------------------------------------------------------------------------------------------------------------------------------------------------------------------------|----------------------------|
| Risk of bias across studies   | 15 | Specify any assessment of risk of bias that may affect the cumulative evidence (e.g., publication bias, selective reporting within studies).                                                             | 11                         |
| Additional analyses           | 16 | Describe methods of additional analyses (e.g., sensitivity or subgroup analyses, meta-regression), if done, indicating which were pre-specified.                                                         | 12-13                      |
| <b>RESULTS</b>                |    |                                                                                                                                                                                                          |                            |
| Study selection               | 17 | Give numbers of studies screened, assessed for eligibility, and included in the review, with reasons for exclusions at each stage, ideally with a flow diagram.                                          | Figure 1<br>eTable 1       |
| Study characteristics         | 18 | For each study, present characteristics for which data were extracted (e.g., study size, PICOS, follow-up period) and provide the citations.                                                             | Table 1                    |
| Risk of bias within studies   | 19 | Present data on risk of bias of each study and, if available, any outcome level assessment (see item 12).                                                                                                | Table 1                    |
| Results of individual studies | 20 | For all outcomes considered (benefits or harms), present, for each study: (a) simple summary data for each intervention group (b) effect estimates and confidence intervals, ideally with a forest plot. | Tables 2-3,<br>eTables 2-4 |
| Synthesis of results          | 21 | Present the main results of the review. If meta-analyses are done, include for each, confidence intervals and measures of consistency.                                                                   | 12-13                      |
| Risk of bias across studies   | 22 | Present results of any assessment of risk of bias across studies (see Item 15).                                                                                                                          | Tables 2-3,<br>eTables 2-4 |

|                     |    |                                                                                                                                                                                      |                          |
|---------------------|----|--------------------------------------------------------------------------------------------------------------------------------------------------------------------------------------|--------------------------|
| Additional analysis | 23 | Give results of additional analyses, if done (e.g., sensitivity or subgroup analyses, meta-regression [see Item 16]).                                                                | 13<br>Supplement results |
| <b>DISCUSSION</b>   |    |                                                                                                                                                                                      |                          |
| Summary of evidence | 24 | Summarize the main findings including the strength of evidence for each main outcome; consider their relevance to key groups (e.g., healthcare providers, users, and policy makers). | 13-16                    |
| Limitations         | 25 | Discuss limitations at study and outcome level (e.g., risk of bias), and at review-level (e.g., incomplete retrieval of identified research, reporting bias).                        | 16-17                    |
| Conclusions         | 26 | Provide a general interpretation of the results in the context of other evidence, and implications for future research.                                                              | 17                       |
| <b>FUNDING</b>      |    |                                                                                                                                                                                      |                          |
| Funding             | 27 | Describe sources of funding for the systematic review and other support (e.g., supply of data); role of funders for the systematic review.                                           | 18-19                    |

From: Moher D, Liberati A, Tetzlaff J, Altman DG, The PRISMA Group (2009). Preferred Reporting Items for Systematic Reviews and Meta-Analyses: The PRISMA Statement. PLoS Med 6(7): e1000097. doi:10.1371/journal.pmed1000097

For more information, visit: [www.prisma-statement.org](http://www.prisma-statement.org).

## MOOSE Checklist for Meta-analyses of Observational Studies

| Item No                                     | Recommendation                                                                                                                                                                                                                                                               | Reported on Page No                   |
|---------------------------------------------|------------------------------------------------------------------------------------------------------------------------------------------------------------------------------------------------------------------------------------------------------------------------------|---------------------------------------|
| Reporting of background should include      |                                                                                                                                                                                                                                                                              |                                       |
| 1                                           | Problem definition                                                                                                                                                                                                                                                           | 6-7                                   |
| 2                                           | Hypothesis statement                                                                                                                                                                                                                                                         | 7                                     |
| 3                                           | Description of study outcome(s)                                                                                                                                                                                                                                              | 7-8                                   |
| 4                                           | Type of exposure or intervention used                                                                                                                                                                                                                                        | 7-8                                   |
| 5                                           | Type of study designs used                                                                                                                                                                                                                                                   | 7-8                                   |
| 6                                           | Study population                                                                                                                                                                                                                                                             | 7-9                                   |
| Reporting of search strategy should include |                                                                                                                                                                                                                                                                              |                                       |
| 7                                           | Qualifications of searchers (eg, librarians and investigators)                                                                                                                                                                                                               | NA                                    |
| 8                                           | Search strategy, including time period included in the synthesis and key words                                                                                                                                                                                               | 7, eAppendix2                         |
| 9                                           | Effort to include all available studies, including contact with authors                                                                                                                                                                                                      | 7                                     |
| 10                                          | Databases and registries searched                                                                                                                                                                                                                                            | 7                                     |
| 11                                          | Search software used, name and version, including special features used (eg, explosion)                                                                                                                                                                                      | NA                                    |
| 12                                          | Use of hand searching (eg, reference lists of obtained articles)                                                                                                                                                                                                             | 7                                     |
| 13                                          | List of citations located and those excluded, including justification                                                                                                                                                                                                        | Figure 1, eTable 1                    |
| 14                                          | Method of addressing articles published in languages other than English                                                                                                                                                                                                      | We placed restrictions on English.    |
| 15                                          | Method of handling abstracts and unpublished studies                                                                                                                                                                                                                         | NA                                    |
| 16                                          | Description of any contact with authors                                                                                                                                                                                                                                      | NA                                    |
| Reporting of methods should include         |                                                                                                                                                                                                                                                                              |                                       |
| 17                                          | Description of relevance or appropriateness of studies assembled for assessing the hypothesis to be tested                                                                                                                                                                   | 7-8                                   |
| 18                                          | Rationale for the selection and coding of data (eg, sound clinical principles or convenience)                                                                                                                                                                                | 8-9                                   |
| 19                                          | Documentation of how data were classified and coded (eg, multiple raters, blinding and interrater reliability)                                                                                                                                                               | 8-9                                   |
| 20                                          | Assessment of confounding (eg, comparability of cases and controls in studies where appropriate)                                                                                                                                                                             | 9-10                                  |
| 21                                          | Assessment of study quality, including blinding of quality assessors, stratification or regression on possible predictors of study results                                                                                                                                   | 9-10                                  |
| 22                                          | Assessment of heterogeneity                                                                                                                                                                                                                                                  | 9-10                                  |
| 23                                          | Description of statistical methods (eg, complete description of fixed or random effects models, justification of whether the chosen models account for predictors of study results, dose-response models, or cumulative meta-analysis) in sufficient detail to be replicated | 9-10                                  |
| 24                                          | Provision of appropriate tables and graphics                                                                                                                                                                                                                                 | Tables 1-4, Figure 1, Supplement file |

|                                     |                                                                     |                             |
|-------------------------------------|---------------------------------------------------------------------|-----------------------------|
| Reporting of results should include |                                                                     |                             |
| 25                                  | Graphic summarizing individual study estimates and overall estimate | Tables 2-3, Supplement file |
| 26                                  | Table giving descriptive information for each study included        | Table 1                     |
| 27                                  | Results of sensitivity testing (eg, subgroup analysis)              | Table 4, Supplement file    |
| 28                                  | Indication of statistical uncertainty of findings                   | Supplement file             |

| Item No                                 | Recommendation                                                                                                            | Reported on Page No |
|-----------------------------------------|---------------------------------------------------------------------------------------------------------------------------|---------------------|
| Reporting of discussion should include  |                                                                                                                           |                     |
| 29                                      | Quantitative assessment of bias (eg, publication bias)                                                                    | NA                  |
| 30                                      | Justification for exclusion (eg, exclusion of non-English language citations)                                             | NA                  |
| 31                                      | Assessment of quality of included studies                                                                                 | 11, Table 4         |
| Reporting of conclusions should include |                                                                                                                           |                     |
| 32                                      | Consideration of alternative explanations for observed results                                                            | 13-17               |
| 33                                      | Generalization of the conclusions (ie, appropriate for the data presented and within the domain of the literature review) | 14-17               |
| 34                                      | Guidelines for future research                                                                                            | 17                  |
| 35                                      | Disclosure of funding source                                                                                              | 18-19               |

From: Stroup DF, Berlin JA, Morton SC, et al, for the Meta-analysis Of Observational Studies in Epidemiology (MOOSE) Group. Meta-analysis of Observational Studies in Epidemiology. A Proposal for Reporting. *JAMA*. 2000;283(15):2008-2012. doi: 10.1001/jama.283.15.2008.

Transcribed from the original paper within the NEUROSURGERY® Editorial Office, Atlanta, GA, United States. August 2012.

## eAppendix 2. Search Strings for PubMed

("serotonin uptake inhibitors"[Pharmacological Action] OR "serotonin uptake inhibitors"[MeSH Terms] OR ("serotonin"[All Fields] AND "uptake"[All Fields] AND "inhibitors"[All Fields]) OR "serotonin uptake inhibitors"[All Fields] OR ("selective"[All Fields] AND "serotonin"[All Fields] AND "reuptake"[All Fields] AND "inhibitors"[All Fields]) OR "selective serotonin reuptake inhibitors"[All Fields]) OR ("serotonin uptake inhibitors"[Pharmacological Action] OR "serotonin uptake inhibitors"[MeSH Terms] OR ("serotonin"[All Fields] AND "uptake"[All Fields] AND "inhibitors"[All Fields]) OR "serotonin uptake inhibitors"[All Fields] OR "ssris"[All Fields]) OR ("antidepressive agents"[Pharmacological Action] OR "antidepressive agents"[MeSH Terms] OR ("antidepressive"[All Fields] AND "agents"[All Fields]) OR "antidepressive agents"[All Fields] OR "antidepressants"[All Fields]) OR (antidepranalgesia[All Fields] OR antidepredatory[All Fields] OR antideprein[All Fields] OR antidepres[All Fields] OR antidepres'iva[All Fields] OR antidepres'ivn'i[All Fields] OR antidepres'ivn'ich[All Fields] OR antidepres'ivy[All Fields] OR antidepresan[All Fields] OR antidepresant[All Fields] OR antidepresanti[All Fields] OR antidepresants[All Fields] OR antidepresantu[All Fields] OR antidepresessant[All Fields] OR antidepreseurs[All Fields] OR antidepresiv[All Fields] OR antidepresiva[All Fields] OR antidepresivach[All Fields] OR antidepresivami[All Fields] OR antidepresivas[All Fields] OR antidepressive[All Fields] OR antidepressivem[All Fields] OR antidepressives[All Fields] OR antidepressivi[All Fields] OR antidepressivima[All Fields] OR antidepressivim[All Fields] OR antidepressivnaih[All Fields] OR antidepressivni[All Fields] OR antidepressivnich[All Fields] OR antidepressivniho[All Fields] OR antidepressivnim[All Fields] OR antidepressivnimu[All Fields] OR antidepressivnych[All Fields] OR antidepressivo[All Fields] OR antidepressivos[All Fields] OR antidepressivum[All Fields] OR antidepressivy[All Fields] OR antidepresor[All Fields] OR antidepress[All Fields] OR antidepressand[All Fields] OR antidepressani[All Fields] OR antidepressanov[All Fields] OR antidepressans[All Fields] OR antidepressant[All Fields] OR antidepressant'[All Fields] OR antidepressant's[All Fields] OR antidepressanta[All Fields] OR antidepressantam[All Fields] OR antidepressantami[All Fields] OR antidepressanteffects[All Fields] OR antidepressantinduced[All Fields] OR antidepressantlike[All Fields] OR antidepressantlithium[All Fields] OR antidepressantnogo[All Fields] OR antidepressantom[All Fields] OR antidepressantov[All Fields] OR antidepressants[All Fields] OR antidepressants'[All Fields] OR antidepressantswere[All Fields] OR antidepressantu[All Fields] OR antidepressantv[All Fields] OR antidepressanty[All Fields] OR antidepressed[All Fields] OR antidepressent[All Fields] OR antidepressents[All Fields] OR antidepresseur[All Fields] OR antidepresseurs[All Fields] OR antidepresseurs'[All Fields] OR antidepresseus[All Fields] OR antidepresseuses[All Fields] OR antidepressia[All Fields] OR antidepressief[All Fields] OR antidepressieve[All Fields] OR antidepressiewe[All Fields] OR antidepressif[All Fields] OR antidepressifs[All Fields] OR antidepressiivien[All Fields] OR antidepressiiviset[All Fields] OR antidepressin[All Fields] OR antidepressing[All Fields] OR antidepression[All Fields] OR antidepressions[All Fields] OR antidepressionsbehandling[All Fields] OR antidepressiu[All Fields] OR antidepressiv[All Fields] OR antidepressiva[All Fields] OR antidepressivabehandling[All Fields] OR antidepressivarichtlijnen[All Fields] OR antidepressivas[All Fields] OR antidepressivastudien[All Fields] OR antidepressivasubstanzen[All Fields] OR antidepressivatherapie[All Fields] OR antidepressive[All Fields] OR antidepressively[All Fields] OR antidepressivem[All Fields] OR antidepressiven[All Fields] OR antidepressivene[All Fields] OR antidepressiver[All Fields] OR antidepressives[All Fields] OR antidepressivi[All Fields] OR antidepressivnikh[All Fields] OR antidepressivnoe[All Fields] OR antidepressivnogo[All Fields] OR antidepressivnoi[All Fields] OR antidepressivnom[All Fields] OR antidepressivnye[All Fields] OR antidepressivnyi[All Fields] OR antidepressivnykh[All Fields] OR antidepressivnymi[All Fields] OR antidepressivo[All Fields] OR antidepressivos[All Fields] OR antidepressivt[All Fields] OR antidepressivum[All Fields] OR antidepressivum'[All Fields] OR antidepressivums[All Fields] OR

antidepressziv[All Fields] OR antidepresszivum[All Fields] OR antidepresszivumhasznalat[All Fields] OR antidepresszivumok[All Fields] OR antidepresszivumot[All Fields] OR antidepressiventi[All Fields] OR antidepressin[All Fields] OR antidepresssants[All Fields] OR antidepresssiva[All Fields] OR antidepresssives[All Fields] OR ("citalopram"[MeSH Terms] OR "citalopram"[All Fields]) OR ("citalopram"[MeSH Terms] OR "citalopram"[All Fields] OR "escitalopram"[All Fields]) OR ("fluoxetine"[MeSH Terms] OR "fluoxetine"[All Fields]) OR ("fluvoxamine"[MeSH Terms] OR "fluvoxamine"[All Fields]) OR ("paroxetine"[MeSH Terms] OR "paroxetine"[All Fields]) OR ("sertraline"[MeSH Terms] OR "sertraline"[All Fields]) OR ("monoamine oxidase inhibitors"[Pharmacological Action] OR "monoamine oxidase inhibitors"[MeSH Terms] OR ("monoamine"[All Fields] AND "oxidase"[All Fields] AND "inhibitors"[All Fields]) OR "monoamine oxidase inhibitors"[All Fields] OR "maoi"[All Fields]) OR ("antidepressive agents, tricyclic"[Pharmacological Action] OR "antidepressive agents, tricyclic"[MeSH Terms] OR ("antidepressive"[All Fields] AND "agents"[All Fields] AND "tricyclic"[All Fields]) OR "tricyclic antidepressive agents"[All Fields] OR ("tricyclic"[All Fields] AND "antidepressant"[All Fields]) OR "tricyclic antidepressant"[All Fields]) OR ("Theor Chem Acc"[Journal] OR "tca"[All Fields]) OR (("serotonin"[MeSH Terms] OR "serotonin"[All Fields]) AND ("norepinephrine"[MeSH Terms] OR "norepinephrine"[All Fields] OR "noradrenaline"[All Fields]) AND reuptake[All Fields] AND inhibitor[All Fields]) OR ("serotonin and noradrenaline reuptake inhibitors"[Pharmacological Action] OR "serotonin and noradrenaline reuptake inhibitors"[MeSH Terms] OR ("serotonin"[All Fields] AND "noradrenaline"[All Fields] AND "reuptake"[All Fields] AND "inhibitors"[All Fields]) OR "serotonin and noradrenaline reuptake inhibitors"[All Fields] OR "snri"[All Fields]) OR (("serotonin antagonists"[Pharmacological Action] OR "serotonin antagonists"[MeSH Terms] OR ("serotonin"[All Fields] AND "antagonists"[All Fields]) OR "serotonin antagonists"[All Fields] OR ("serotonin"[All Fields] AND "antagonist"[All Fields]) OR "serotonin antagonist"[All Fields]) AND reuptake[All Fields] AND inhibitor[All Fields]) OR SARI[All Fields] OR (("norepinephrine"[MeSH Terms] OR "norepinephrine"[All Fields]) AND ("dopamine uptake inhibitors"[Pharmacological Action] OR "dopamine uptake inhibitors"[MeSH Terms] OR ("dopamine"[All Fields] AND "uptake"[All Fields] AND "inhibitors"[All Fields]) OR "dopamine uptake inhibitors"[All Fields] OR ("dopamine"[All Fields] AND "reuptake"[All Fields] AND "inhibitor"[All Fields]) OR "dopamine reuptake inhibitor"[All Fields])) OR NDRI[All Fields] OR (("norepinephrine"[MeSH Terms] OR "norepinephrine"[All Fields]) AND reuptake[All Fields] AND inhibitor[All Fields]) OR NRI[All Fields] OR (noradrenergic[All Fields] AND specific[All Fields] AND serotonergic[All Fields] AND ("antidepressive agents"[Pharmacological Action] OR "antidepressive agents"[MeSH Terms] OR ("antidepressive"[All Fields] AND "agents"[All Fields]) OR "antidepressive agents"[All Fields] OR "antidepressant"[All Fields])) OR NaSSA[All Fields] AND (("suicide"[MeSH Terms] OR "suicide"[All Fields]) OR ("suicidal ideation"[MeSH Terms] OR "suicidal"[All Fields] AND "ideation"[All Fields]) OR "suicidal ideation"[All Fields]) OR (("suicide"[MeSH Terms] OR "suicide"[All Fields]) AND ("risk"[MeSH Terms] OR "risk"[All Fields])) OR (serious[All Fields] AND adverse[All Fields] AND events[All Fields]) OR ("adverse effects"[Subheading] OR "adverse"[All Fields] AND "effects"[All Fields]) OR "adverse effects"[All Fields] OR ("side"[All Fields] AND "effects"[All Fields]) OR "side effects"[All Fields]) OR harm[All Fields] OR ("fractures, bone"[MeSH Terms] OR ("fractures"[All Fields] AND "bone"[All Fields]) OR "bone fractures"[All Fields] OR ("bone"[All Fields] AND "fractures"[All Fields])) OR ("psychomotor agitation"[MeSH Terms] OR ("psychomotor"[All Fields] AND "agitation"[All Fields]) OR "psychomotor agitation"[All Fields] OR "akathisia"[All Fields]) OR ("photosensitivity disorders"[MeSH Terms] OR ("photosensitivity"[All Fields] AND "disorders"[All Fields]) OR "photosensitivity disorders"[All Fields] OR "photosensitivity"[All Fields]) OR ("sexual behavior"[MeSH Terms] OR "sexual"[All Fields] AND "behavior"[All Fields]) OR "sexual behavior"[All Fields] OR "sexual"[All Fields]) AND ("physiopathology"[Subheading] OR "physiopathology"[All Fields] OR "dysfunction"[All Fields])) OR ("coronary disease"[MeSH Terms] OR ("coronary"[All Fields] AND "disease"[All Fields]) OR "coronary disease"[All Fields] OR ("coronary"[All Fields] AND "heart"[All Fields] AND "disease"[All Fields]) OR



"coronary heart disease"[All Fields]) OR ("hemorrhage"[MeSH Terms] OR "hemorrhage"[All Fields] OR "bleeding"[All Fields]) OR (("fractures, bone"[MeSH Terms] OR ("fractures"[All Fields] AND "bone"[All Fields]) OR "bone fractures"[All Fields] OR "fracture"[All Fields]) AND ("risk"[MeSH Terms] OR "risk"[All Fields])) OR (discontinuation[All Fields] AND ("syndrome"[MeSH Terms] OR "syndrome"[All Fields])) OR ("serotonin syndrome"[MeSH Terms] OR ("serotonin"[All Fields] AND "syndrome"[All Fields]) OR "serotonin syndrome"[All Fields]) OR ("neonatal abstinence syndrome"[MeSH Terms] OR ("neonatal"[All Fields] AND "abstinence"[All Fields] AND "syndrome"[All Fields]) OR "neonatal abstinence syndrome"[All Fields]) OR ("autistic disorder"[MeSH Terms] OR ("autistic"[All Fields] AND "disorder"[All Fields]) OR "autistic disorder"[All Fields] OR "autism"[All Fields])) AND (("meta-analysis"[Publication Type] OR "meta-analysis as topic"[MeSH Terms] OR "meta-analysis"[All Fields]) OR ("meta-analysis as topic"[MeSH Terms] OR "meta-analysis"[All Fields] AND "topic"[All Fields]) OR "meta-analysis as topic"[All Fields] OR "metaanalysis"[All Fields]) OR "systematic review"[All Fields])

**eTable 1. Articles Excluded After Full-Text Revision, With Reasons**

| <b>Author, year (Reference)</b> | <b>Reason for exclusion</b>                                                                                          |
|---------------------------------|----------------------------------------------------------------------------------------------------------------------|
| Ng, 2019 <sup>1</sup>           | Overlapping meta-analysis or systematic review of association of antidepressants and risk of adverse health outcomes |
| Patel, 2019 <sup>2</sup>        | Not reporting an association of antidepressants and risk of adverse health outcomes                                  |
| Rexwinkel, 2019 <sup>3</sup>    | Nether a meta-analysis or systematic review with quantitative synthesis                                              |
| Perlman, 2019 <sup>4</sup>      | Nether a meta-analysis or systematic review with quantitative synthesis                                              |
| Amare, 2019 <sup>5</sup>        | Not reporting an association of antidepressants and risk of adverse health outcomes                                  |
| Aguiar, 2019 <sup>6</sup>       | Nether a meta-analysis or systematic review with quantitative synthesis                                              |
| Zhou, 2018 <sup>7</sup>         | Not included only case-control and cohort studies                                                                    |
| Wu, 2018 <sup>8</sup>           | Not reporting an association of antidepressants and risk of adverse health outcomes                                  |
| Wang, 2018 <sup>9</sup>         | Nether a meta-analysis or systematic review with quantitative synthesis                                              |
| Visco, 2018 <sup>10</sup>       | Not included only case-control and cohort studies                                                                    |
| Uguz, 2018 <sup>11</sup>        | Nether a meta-analysis or systematic review with quantitative synthesis                                              |
| Tan, 2018 <sup>12</sup>         | Not a meta-analysis or systematic review of observational studies                                                    |
| Telang, 2018 <sup>13</sup>      | Not a meta-analysis or systematic review of observational studies                                                    |
| Sepehrpour, 2018 <sup>14</sup>  | Nether a meta-analysis or systematic review with quantitative synthesis                                              |
| Prady, 2018 <sup>15</sup>       | Nether a meta-analysis or systematic review with quantitative synthesis                                              |
| Cappetta, 2018 <sup>16</sup>    | Not a meta-analysis or systematic review of observational studies                                                    |
| Steinert, 2018 <sup>17</sup>    | Nether a meta-analysis or systematic review with quantitative synthesis                                              |
| Melo, 2018 <sup>18</sup>        | Not included only case-control and cohort studies                                                                    |
| Moncrieff, 2018 <sup>19</sup>   | Nether a meta-analysis or systematic review with quantitative synthesis                                              |
| Douros, 2018 <sup>20</sup>      | Nether a meta-analysis or systematic review with quantitative synthesis                                              |
| Chen, 2018 <sup>21</sup>        | Not a meta-analysis or systematic review of observational studies                                                    |
| Comoretto, 2018 <sup>22</sup>   | Not reporting an association of antidepressants and risk of adverse health outcomes                                  |
| Varney, 2017 <sup>23</sup>      | Nether a meta-analysis or systematic review with quantitative synthesis                                              |
| Uguz, 2017 <sup>24</sup>        | Nether a meta-analysis or systematic review with quantitative synthesis                                              |
| Salvi, 2017 <sup>25</sup>       | Not included only case-control and cohort studies                                                                    |
| Stubbs, 2017 <sup>26</sup>      | Nether a meta-analysis or systematic review with quantitative synthesis                                              |
| Riediger, 2017 <sup>27</sup>    | Not a meta-analysis or systematic review of observational studies                                                    |
| Querido, 2017 <sup>28</sup>     | Nether a meta-analysis or systematic review with quantitative synthesis                                              |
| Mezzacappa, 2017 <sup>29</sup>  | Overlapping meta-analysis or systematic review of association of antidepressants and risk of adverse health outcomes |
| Maund, 2017 <sup>30</sup>       | Not a meta-analysis or systematic review of observational studies                                                    |
| Moraros, 2017 <sup>31</sup>     | Not included only case-control and cohort studies                                                                    |
| Locher, 2017 <sup>32</sup>      | Not a meta-analysis or systematic review of observational studies                                                    |
| Laux, 2017 <sup>33</sup>        | Nether a meta-analysis or systematic review with quantitative synthesis                                              |
| Kaplan, 2017 <sup>34</sup>      | Overlapping meta-analysis or systematic review of association of antidepressants and risk of adverse health outcomes |
| Heller, 2017 <sup>35</sup>      | Nether a meta-analysis or systematic review with quantitative synthesis                                              |
| Hill, 2017 <sup>36</sup>        | Not included only case-control and cohort studies                                                                    |
| Deidda, 2017 <sup>37</sup>      | Nether a meta-analysis or systematic review with quantitative synthesis                                              |
| Brunnauer, 2017 <sup>38</sup>   | Nether a meta-analysis or systematic review with quantitative synthesis                                              |

|                                 |                                                                                                                      |
|---------------------------------|----------------------------------------------------------------------------------------------------------------------|
| Brown, 2017 <sup>39</sup>       | Overlapping meta-analysis or systematic review of association of antidepressants and risk of adverse health outcomes |
| Beyer, 2017 <sup>40</sup>       | Not a meta-analysis or systematic review of observational studies                                                    |
| Andrade, 2017 <sup>41</sup>     | Nether a meta-analysis or systematic review with quantitative synthesis                                              |
| Allain, 2017 <sup>42</sup>      | Nether a meta-analysis or systematic review with quantitative synthesis                                              |
| Vlachos, 2016 <sup>43</sup>     | Nether a meta-analysis or systematic review with quantitative synthesis                                              |
| Werneke, 2016 <sup>44</sup>     | Not reporting an association of antidepressants and risk of adverse health outcomes                                  |
| Warden, 2016 <sup>45</sup>      | Nether a meta-analysis or systematic review with quantitative synthesis                                              |
| Torjesen, 2016 <sup>46</sup>    | Commentary                                                                                                           |
| Stone, 2016 <sup>47</sup>       | Commentary                                                                                                           |
| Smit, 2016 <sup>48</sup>        | Nether a meta-analysis or systematic review with quantitative synthesis                                              |
| Simonsen, 2016 <sup>49</sup>    | Nether a meta-analysis or systematic review with quantitative synthesis                                              |
| Sharma, 2016 <sup>50</sup>      | Nether a meta-analysis or systematic review with quantitative synthesis                                              |
| Selmer, 2016 <sup>51</sup>      | Insufficient or inadequate data for quantitative synthesis provided                                                  |
| Rudisill, 2016 <sup>52</sup>    | Insufficient or inadequate data for quantitative synthesis provided                                                  |
| Pozzi, 2016 <sup>53</sup>       | Nether a meta-analysis or systematic review with quantitative synthesis                                              |
| Potočnjak, 2016 <sup>54</sup>   | Nether a meta-analysis or systematic review with quantitative synthesis                                              |
| Muzik, 2016 <sup>55</sup>       | Nether a meta-analysis or systematic review with quantitative synthesis                                              |
| Lassen, 2016 <sup>56</sup>      | Insufficient or inadequate data for quantitative synthesis provided                                                  |
| Kaplan, 2016 <sup>57</sup>      | Overlapping meta-analysis or systematic review of association of antidepressants and risk of adverse health outcomes |
| Kobayashi, 2016 <sup>58</sup>   | Overlapping meta-analysis or systematic review of association of antidepressants and risk of adverse health outcomes |
| Jordan, 2016 <sup>59</sup>      | Nether a meta-analysis or systematic review with quantitative synthesis                                              |
| Jarde, 2016 <sup>60</sup>       | Not reporting an association of antidepressants and risk of adverse health outcomes                                  |
| Howland, 2016 <sup>61</sup>     | Nether a meta-analysis or systematic review with quantitative synthesis                                              |
| Galling, 2016 <sup>62</sup>     | Not reporting an association of antidepressants and risk of adverse health outcomes                                  |
| Donneyong, 2016 <sup>63</sup>   | Nether a meta-analysis or systematic review with quantitative synthesis                                              |
| Cameron, 2016 <sup>64</sup>     | Nether a meta-analysis or systematic review with quantitative synthesis                                              |
| Braun, 2016 <sup>65</sup>       | Not a meta-analysis or systematic review of observational studies                                                    |
| Bielefeldt, 2016 <sup>66</sup>  | Not a meta-analysis or systematic review of observational studies                                                    |
| Barth, 2016 <sup>67</sup>       | Not a meta-analysis or systematic review of observational studies                                                    |
| Akiyamen, 2016 <sup>68</sup>    | Nether a meta-analysis or systematic review with quantitative synthesis                                              |
| Alvares, 2016 <sup>69</sup>     | Not included only case-control and cohort studies                                                                    |
| Wang, 2015 <sup>70</sup>        | Overlapping meta-analysis or systematic review of association of antidepressants and risk of adverse health outcomes |
| Uchida, 2015 <sup>71</sup>      | Nether a meta-analysis or systematic review with quantitative synthesis                                              |
| Thase, 2015 <sup>72</sup>       | Nether a meta-analysis or systematic review with quantitative synthesis                                              |
| Teo, 2015 <sup>73</sup>         | Nether a meta-analysis or systematic review with quantitative synthesis                                              |
| Tampi, 2015 <sup>74</sup>       | Nether a meta-analysis or systematic review with quantitative synthesis                                              |
| Stubbs, 2015 <sup>75</sup>      | Commentary                                                                                                           |
| Santarsieri, 2015 <sup>76</sup> | Nether a meta-analysis or systematic review with quantitative synthesis                                              |
| Robinson, 2015 <sup>77</sup>    | Commentary                                                                                                           |
| Renoux, 2015 <sup>78</sup>      | Nether a meta-analysis or systematic review with quantitative synthesis                                              |
| Pinheiro, 2015 <sup>79</sup>    | Insufficient or inadequate data for quantitative synthesis provided                                                  |

|                                     |                                                                                                                      |
|-------------------------------------|----------------------------------------------------------------------------------------------------------------------|
| Orsolini, 2015 <sup>80</sup>        | Nether a meta-analysis or systematic review with quantitative synthesis                                              |
| Olfson, 2015 <sup>81</sup>          | Nether a meta-analysis or systematic review with quantitative synthesis                                              |
| Nezafati, 2015 <sup>82</sup>        | Nether a meta-analysis or systematic review with quantitative synthesis                                              |
| Mohler, 2015 <sup>83</sup>          | Commentary                                                                                                           |
| Man, 2015 <sup>84</sup>             | Overlapping meta-analysis or systematic review of association of antidepressants and risk of adverse health outcomes |
| KoKoAung, 2015 <sup>85</sup>        | Full-text could not retrieved                                                                                        |
| Gøtzsche, 2015 <sup>86</sup>        | Commentary                                                                                                           |
| Gentile, 2015 <sup>87</sup>         | Nether a meta-analysis or systematic review with quantitative synthesis                                              |
| Gentile, 2015 <sup>88</sup>         | Nether a meta-analysis or systematic review with quantitative synthesis                                              |
| Gebara, 2015 <sup>89</sup>          | Nether a meta-analysis or systematic review with quantitative synthesis                                              |
| Ennis, 2015 <sup>90</sup>           | Not reporting an association of antidepressants and risk of adverse health outcomes                                  |
| Davis, 2015 <sup>91</sup>           | Not reporting an association of antidepressants and risk of adverse health outcomes                                  |
| Correll, 2015 <sup>92</sup>         | Nether a meta-analysis or systematic review with quantitative synthesis                                              |
| Bruning, 2015 <sup>93</sup>         | Nether a meta-analysis or systematic review with quantitative synthesis                                              |
| Stevenson, 2014 <sup>94</sup>       | Nether a meta-analysis or systematic review with quantitative synthesis                                              |
| Ross, 2014 <sup>95</sup>            | Commentary                                                                                                           |
| Rais, 2014 <sup>96</sup>            | Overlapping meta-analysis or systematic review of association of antidepressants and risk of adverse health outcomes |
| Park, 2015 <sup>97</sup>            | Not included only case-control and cohort studies                                                                    |
| Prieto-Alhambra, 2014 <sup>98</sup> | Nether a meta-analysis or systematic review with quantitative synthesis                                              |
| Previti, 2014 <sup>99</sup>         | Nether a meta-analysis or systematic review with quantitative synthesis                                              |
| Pereira, 2014 <sup>100</sup>        | Nether a meta-analysis or systematic review with quantitative synthesis                                              |
| Pedersen, 2014 <sup>101</sup>       | Nether a meta-analysis or systematic review with quantitative synthesis                                              |
| Paumgarten, 2014 <sup>102</sup>     | Nether a meta-analysis or systematic review with quantitative synthesis                                              |
| Okazaki, 2014 <sup>103</sup>        | Nether a meta-analysis or systematic review with quantitative synthesis                                              |
| Oka, 2014 <sup>104</sup>            | Insufficient or inadequate data for quantitative synthesis provided                                                  |
| McDonagh, 2014 <sup>105</sup>       | Overlapping meta-analysis or systematic review of association of antidepressants and risk of adverse health outcomes |
| Mahdanian, 2014 <sup>106</sup>      | Nether a meta-analysis or systematic review with quantitative synthesis                                              |
| Mago, 2014 <sup>107</sup>           | Nether a meta-analysis or systematic review with quantitative synthesis                                              |
| Lorenzo, 2014 <sup>108</sup>        | Nether a meta-analysis or systematic review with quantitative synthesis                                              |
| Li, 2014 <sup>109</sup>             | Nether a meta-analysis or systematic review with quantitative synthesis                                              |
| Isacsson, 2014 <sup>110</sup>       | Nether a meta-analysis or systematic review with quantitative synthesis                                              |
| Grigoriadis, 2014 <sup>111</sup>    | Nether a meta-analysis or systematic review with quantitative synthesis                                              |
| Gebara, 2014 <sup>112</sup>         | Nether a meta-analysis or systematic review with quantitative synthesis                                              |
| Fanoë, 2014 <sup>113</sup>          | Nether a meta-analysis or systematic review with quantitative synthesis                                              |
| El Marroun, 2014 <sup>114</sup>     | Nether a meta-analysis or systematic review with quantitative synthesis                                              |
| Costoloni, 2014 <sup>115</sup>      | Nether a meta-analysis or systematic review with quantitative synthesis                                              |
| Clayton, 2014 <sup>116</sup>        | Nether a meta-analysis or systematic review with quantitative synthesis                                              |
| Beach, 2014 <sup>117</sup>          | Insufficient or inadequate data for quantitative synthesis provided                                                  |
| Anglin, 2014 <sup>118</sup>         | Overlapping meta-analysis or systematic review of association of antidepressants and risk of adverse health outcomes |
| Andrade, 2014 <sup>119</sup>        | Nether a meta-analysis or systematic review with quantitative synthesis                                              |
| Rotella, 2013 <sup>120</sup>        | Not reporting an association of antidepressants and risk of adverse health outcomes                                  |

|                                    |                                                                                                                      |
|------------------------------------|----------------------------------------------------------------------------------------------------------------------|
| Rabenda, 2013 <sup>121</sup>       | Insufficient or inadequate data for quantitative synthesis provided                                                  |
| Painuly, 2013 <sup>122</sup>       | Overlapping meta-analysis or systematic review of association of antidepressants and risk of adverse health outcomes |
| Nassir, 2013 <sup>123</sup>        | Nether a meta-analysis or systematic review with quantitative synthesis                                              |
| Myles, 2013 <sup>124</sup>         | Overlapping meta-analysis or systematic review of association of antidepressants and risk of adverse health outcomes |
| Mintzes, 2013 <sup>125</sup>       | Commentary                                                                                                           |
| Kennedy, 2013 <sup>126</sup>       | Commentary                                                                                                           |
| Howland, 2013 <sup>127</sup>       | Nether a meta-analysis or systematic review with quantitative synthesis                                              |
| Grigoriadis, 2013 <sup>128</sup>   | Overlapping meta-analysis or systematic review of association of antidepressants and risk of adverse health outcomes |
| Grigoriadis, 2013 <sup>129</sup>   | Nether a meta-analysis or systematic review with quantitative synthesis                                              |
| Gahr, 2013 <sup>130</sup>          | Nether a meta-analysis or systematic review with quantitative synthesis                                              |
| De Jong, 2013 <sup>131</sup>       | Nether a meta-analysis or systematic review with quantitative synthesis                                              |
| De Groot, 2013 <sup>132</sup>      | Nether a meta-analysis or systematic review with quantitative synthesis                                              |
| Brunnauer, 2013 <sup>133</sup>     | Nether a meta-analysis or systematic review with quantitative synthesis                                              |
| Bhattacharjee, 2013 <sup>134</sup> | Not included only case-control and cohort studies                                                                    |
| Barnard, 2013 <sup>135</sup>       | Nether a meta-analysis or systematic review with quantitative synthesis                                              |
| Al-Zoairy, 2013 <sup>136</sup>     | Nether a meta-analysis or systematic review with quantitative synthesis                                              |
| Wu, 2012 <sup>137</sup>            | Overlapping meta-analysis or systematic review of association of antidepressants and risk of adverse health outcomes |
| T Jong, 2012 <sup>138</sup>        | Nether a meta-analysis or systematic review with quantitative synthesis                                              |
| Sansone, 2012 <sup>139</sup>       | Nether a meta-analysis or systematic review with quantitative synthesis                                              |
| Pan, 2012 <sup>140</sup>           | Nether a meta-analysis or systematic review with quantitative synthesis                                              |
| Oyebode, 2012 <sup>141</sup>       | Nether a meta-analysis or systematic review with quantitative synthesis                                              |
| Nischal, 2012 <sup>142</sup>       | Nether a meta-analysis or systematic review with quantitative synthesis                                              |
| Malm, 2012 <sup>143</sup>          | Nether a meta-analysis or systematic review with quantitative synthesis                                              |
| Lopez-Yarto, 2012 <sup>144</sup>   | Insufficient or inadequate data for quantitative synthesis provided                                                  |
| Kucukaycan, 2012 <sup>145</sup>    | Nether a meta-analysis or systematic review with quantitative synthesis                                              |
| KoKoAung, 2012 <sup>146</sup>      | Full-text could not retrieved                                                                                        |
| Hennings, 2012 <sup>147</sup>      | Nether a meta-analysis or systematic review with quantitative synthesis                                              |
| Hackam, 2012 <sup>148</sup>        | Insufficient or inadequate data for quantitative synthesis provided                                                  |
| Grzeskowiak, 2012 <sup>149</sup>   | Nether a meta-analysis or systematic review with quantitative synthesis                                              |
| Einaronson, 2012 <sup>150</sup>    | Nether a meta-analysis or systematic review with quantitative synthesis                                              |
| Eom, 2012 <sup>151</sup>           | Overlapping meta-analysis or systematic review of association of antidepressants and risk of adverse health outcomes |
| Colotto, 2012 <sup>152</sup>       | Nether a meta-analysis or systematic review with quantitative synthesis                                              |
| Bromley, 2012 <sup>153</sup>       | Nether a meta-analysis or systematic review with quantitative synthesis                                              |
| Adams, 2012 <sup>154</sup>         | Not reporting an association of antidepressants and risk of adverse health outcomes                                  |
| Gentile, 2011 <sup>155</sup>       | Nether a meta-analysis or systematic review with quantitative synthesis                                              |
| Gentile, 2011 <sup>156</sup>       | Nether a meta-analysis or systematic review with quantitative synthesis                                              |
| Fenger-Gron, 2011 <sup>157</sup>   | Nether a meta-analysis or systematic review with quantitative synthesis                                              |
| Davano, 2011 <sup>158</sup>        | Nether a meta-analysis or systematic review with quantitative synthesis                                              |
| Dassanayake, 2011 <sup>159</sup>   | Not reporting an association of antidepressants and risk of adverse health outcomes                                  |
| Berkowitz, 2011 <sup>160</sup>     | Nether a meta-analysis or systematic review with quantitative synthesis                                              |
| Barbui, 2011 <sup>161</sup>        | Nether a meta-analysis or systematic review with quantitative synthesis                                              |

|                                   |                                                                                                                      |
|-----------------------------------|----------------------------------------------------------------------------------------------------------------------|
| Wurst, 2010 <sup>162</sup>        | Insufficient or inadequate data for quantitative synthesis provided                                                  |
| Wu, 2010 <sup>163</sup>           | Not reporting an association of antidepressants and risk of adverse health outcomes                                  |
| Van Driel, 2010 <sup>164</sup>    | Nether a meta-analysis or systematic review with quantitative synthesis                                              |
| Udechuku, 2010 <sup>165</sup>     | Nether a meta-analysis or systematic review with quantitative synthesis                                              |
| Tuccori, 2010 <sup>166</sup>      | Nether a meta-analysis or systematic review with quantitative synthesis                                              |
| Simoncelli, 2010 <sup>167</sup>   | Nether a meta-analysis or systematic review with quantitative synthesis                                              |
| Scialli, 2010 <sup>168</sup>      | Commentary                                                                                                           |
| Kemp, 2010 <sup>169</sup>         | Not included only case-control and cohort studies                                                                    |
| Kölch, 2010 <sup>170</sup>        | Nether a meta-analysis or systematic review with quantitative synthesis                                              |
| Kontakioti, 2010 <sup>171</sup>   | Nether a meta-analysis or systematic review with quantitative synthesis                                              |
| Einarson, 2010 <sup>172</sup>     | Commentary                                                                                                           |
| Einarson, 2010 <sup>173</sup>     | Nether a meta-analysis or systematic review with quantitative synthesis                                              |
| Berard, 2010 <sup>174</sup>       | Commentary                                                                                                           |
| Woolcott, 2009 <sup>175</sup>     | Not included only case-control and cohort studies                                                                    |
| Fortinguerra, 2009 <sup>176</sup> | Nether a meta-analysis or systematic review with quantitative synthesis                                              |
| Bergemann, 2009 <sup>177</sup>    | Nether a meta-analysis or systematic review with quantitative synthesis                                              |
| Taylor, 2008 <sup>178</sup>       | Nether a meta-analysis or systematic review with quantitative synthesis                                              |
| Sterke, 2008 <sup>179</sup>       | Nether a meta-analysis or systematic review with quantitative synthesis                                              |
| O'Brien, 2008 <sup>180</sup>      | Insufficient or inadequate data for quantitative synthesis provided                                                  |
| Loke, 2008 <sup>181</sup>         | Overlapping meta-analysis or systematic review of association of antidepressants and risk of adverse health outcomes |
| Kongkaew, 2008 <sup>182</sup>     | Nether a meta-analysis or systematic review with quantitative synthesis                                              |
| Bond, 2008 <sup>183</sup>         | Not a meta-analysis or systematic review of observational studies                                                    |
| Takkouche, 2007 <sup>184</sup>    | Insufficient or inadequate data for quantitative synthesis provided                                                  |
| Howard, 2007 <sup>185</sup>       | Nether a meta-analysis or systematic review with quantitative synthesis                                              |
| Hartikainen, 2007 <sup>186</sup>  | Nether a meta-analysis or systematic review with quantitative synthesis                                              |
| Bellantuono, 2007 <sup>187</sup>  | Nether a meta-analysis or systematic review with quantitative synthesis                                              |
| Bar-Oz, 2007 <sup>188</sup>       | Overlapping meta-analysis or systematic review of association of antidepressants and risk of adverse health outcomes |
| Swenson, 2006 <sup>189</sup>      | Not a meta-analysis or systematic review of observational studies                                                    |
| Sala, 2006 <sup>190</sup>         | Nether a meta-analysis or systematic review with quantitative synthesis                                              |
| Rahimi, 2006 <sup>191</sup>       | Overlapping meta-analysis or systematic review of association of antidepressants and risk of adverse health outcomes |
| McIntyre, 2006 <sup>192</sup>     | Nether a meta-analysis or systematic review with quantitative synthesis                                              |
| McClintock, 2006 <sup>193</sup>   | Nether a meta-analysis or systematic review with quantitative synthesis                                              |
| Hall, 2006 <sup>194</sup>         | Nether a meta-analysis or systematic review with quantitative synthesis                                              |
| Lattimore, 2005 <sup>195</sup>    | Insufficient or inadequate data for quantitative synthesis provided                                                  |
| Gentile, 2005 <sup>196</sup>      | Nether a meta-analysis or systematic review with quantitative synthesis                                              |
| Einarson, 2005 <sup>197</sup>     | Insufficient or inadequate data for quantitative synthesis provided                                                  |
| Wen, 2004 <sup>198</sup>          | Nether a meta-analysis or systematic review with quantitative synthesis                                              |
| Weissman, 2004 <sup>199</sup>     | Nether a meta-analysis or systematic review with quantitative synthesis                                              |
| Ramasubbu, 2004 <sup>200</sup>    | Nether a meta-analysis or systematic review with quantitative synthesis                                              |
| Newman, 2004 <sup>201</sup>       | Nether a meta-analysis or systematic review with quantitative synthesis                                              |
| McIntosh, 2004 <sup>202</sup>     | Nether a meta-analysis or systematic review with quantitative synthesis                                              |

|                               |                                                                         |
|-------------------------------|-------------------------------------------------------------------------|
| Bailey, 2004 <sup>203</sup>   | Insufficient or inadequate data for quantitative synthesis provided     |
| Weinrieb, 2003 <sup>204</sup> | Nether a meta-analysis or systematic review with quantitative synthesis |
| Addis, 2000 <sup>205</sup>    | Insufficient or inadequate data for quantitative synthesis provided     |
| Thase, 1998 <sup>206</sup>    | Nether a meta-analysis or systematic review with quantitative synthesis |
| Wilens, 1996 <sup>207</sup>   | Nether a meta-analysis or systematic review with quantitative synthesis |

**eTable 2.** Characteristics of Meta-analyses of Observational Studies Studying the Association Between Antidepressants and Risk of Any Adverse Health Outcome

| Study<br>(see references 38-82 in<br>the main text) | Type of studies<br>included | Risks of adverse health<br>outcomes examined                                                                    | Exposures             | Non-exposures<br>(comparator) | No of<br>associations<br>(no of<br>included<br>studies<br>estimates) | Population (s)                                   | Average of<br>adjustment<br>s<br>(range) | AMSTAR2        |
|-----------------------------------------------------|-----------------------------|-----------------------------------------------------------------------------------------------------------------|-----------------------|-------------------------------|----------------------------------------------------------------------|--------------------------------------------------|------------------------------------------|----------------|
| Masarwa, 2019                                       | Case-control<br>and cohort  | Persistent pulmonary<br>hypertension of the newborn                                                             | SSRIs+SNRIs           | No SSRIs+SNRIs<br>use         | 2 (19)                                                               | Pregnant women (any<br>trimester)                | 9 (4-16)                                 | Moderate       |
| Halvorsen, 2019                                     | Case-control<br>and cohort  | Autism spectrum disorders,<br>attention-deficit hyperactivity<br>disorder and mental<br>retardation in children | SSRIs                 | No SSRIs use                  | 3 (16)                                                               | Pregnant women (any<br>trimester)                | 12 (4-19)                                | Moderate       |
| Wang, 2018                                          | Case-control<br>and cohort  | Dementia                                                                                                        | SSRIs; TCAs;<br>MAOIs | No ADs use                    | 3 (11)                                                               | Elderly patients with<br>various disorders       | 10 (8-14)                                | Moderate       |
| Schweiger, 2018                                     | Case-control<br>and cohort  | Bone mineral density                                                                                            | SSRIs; TCAs           | No ADs use                    | 4 (8)                                                                | Women with<br>depressive disorders               | NR                                       | Critically Low |
| Khanassov, 2018                                     | Case-control<br>and cohort  | Osteoporotic fractures                                                                                          | SSRIs                 | No SSRIs                      | 1 (24)                                                               | General population of<br>adults and older adults | 15 (2-29)                                | Moderate       |
| Jiang, 2018                                         | Cohort                      | Attention-deficit<br>hyperactivity disorder in<br>children                                                      | Any AD                | No ADs use                    | 8 (34)                                                               | Pregnant women (any<br>trimester)                | 9<br>(7-13)                              | Moderate       |
| Gao, 2018                                           | Cohort                      | Congenital malformations in<br>infants                                                                          | SSRIs                 | No SSRIs use                  | 7 (37)                                                               | Pregnant women (first<br>trimester)              | 5 (2-9)                                  | Moderate       |
| Guan, 2018                                          | Case-control<br>and cohort  | Gestational hypertension<br>and/or preeclampsia                                                                 | SSRIs                 | No SSRIs use                  | 3 (16)                                                               | Pregnant women (any<br>trimester)                | 14<br>(10-18)                            | Moderate       |
| Chappuis, 2018                                      | Cohort                      | Dental implant failure                                                                                          | SSRIs                 | No SSRIs use                  | 1 (2)                                                                | General adult<br>population                      | 4 (2-6)                                  | Moderate       |



| <b>Study<br/>(see references 38-82 in<br/>the main text)</b> | <b>Type of studies<br/>included</b>  | <b>Risks of adverse health<br/>outcomes examined</b>                                       | <b>Exposures</b>       | <b>Non-exposures<br/>(comparator)</b> | <b>No of<br/>associations<br/>(no of<br/>included<br/>studies<br/>estimates)</b> | <b>Population (s)</b>                                                                  | <b>Average of<br/>adjustment<br/>s<br/>(range)</b> | <b>AMSTAR2</b> |
|--------------------------------------------------------------|--------------------------------------|--------------------------------------------------------------------------------------------|------------------------|---------------------------------------|----------------------------------------------------------------------------------|----------------------------------------------------------------------------------------|----------------------------------------------------|----------------|
| Na, 2018                                                     | Case-control                         | GI bleeding; any other type of bleeding; both GI and any other type of bleeding            | Mirtazapine; Bupropion | SSRIs; No medication                  | 5 (20)                                                                           | Patients with a diagnosis of abnormal bleeding; warfarin users; psychiatric inpatients | 9 (4-16)                                           | Moderate       |
| Man, 2018                                                    | Case-control and cohort              | Attention-deficit hyperactivity disorder in children                                       | Any AD                 | No ADs use                            | 2 (12)                                                                           | Women with prenatal or pre-conception exposure to antidepressants                      | 8 (7-9)                                            | Moderate       |
| Fu, 2018                                                     | Nested case-control and case-control | Cataract risk                                                                              | SSRIs; SNRIs; TCAs     | No ADs use                            | 3 (13)                                                                           | Patients with medical/psychiatric diagnoses                                            | 5 (3-10)                                           | Moderate       |
| Eckersley, 2018                                              | Cohort                               | Bleeding; mortality                                                                        | SSRIs                  | No SSRIs use                          | 4 (14)                                                                           | Patients undergoing coronary artery bypass graft surgery                               | 13 (9-16)                                          | Moderate       |
| Zhou, 2018                                                   | Case-control and cohort              | Autism spectrum disorders                                                                  | Any AD                 | No ADs use                            | 1 (13)                                                                           | Pregnant women (any trimester)                                                         | 8 (3-11)                                           | Low            |
| Morales, 2018                                                | Case-control and cohort              | Autism spectrum disorders                                                                  | Any AD                 | No ADs use                            | 2 (13)                                                                           | Women with pre-conception exposure to antidepressants                                  | 8 (3-11)                                           | Moderate       |
| Andalib, 2017                                                | Case-control and cohort              | Autism spectrum disorders                                                                  | SSRIs                  | No SSRIs use                          | 1 (7)                                                                            | Pregnant women (any trimester)                                                         | 7 (3-11)                                           | Moderate       |
| Zhang, 2017                                                  | Cohort                               | Cardiovascular-related malformations of infants; Both atrial and ventricular septal defect | SSRIs                  | No SSRIs use                          | 2 (37)                                                                           | Pregnant women (first trimester)                                                       | 6 (0-13)                                           | Low            |

| Study<br>(see references 38-82 in<br>the main text) | Type of studies<br>included                  | Risks of adverse health<br>outcomes examined               | Exposures                      | Non-exposures<br>(comparator)                    | No of<br>associations<br>(no of<br>included<br>studies<br>estimates) | Population (s)                                                    | Average of<br>adjustment<br>s<br>(range) | AMSTAR2  |
|-----------------------------------------------------|----------------------------------------------|------------------------------------------------------------|--------------------------------|--------------------------------------------------|----------------------------------------------------------------------|-------------------------------------------------------------------|------------------------------------------|----------|
| Shen, 2017                                          | Cohort                                       | Cardiovascular-related malformations of infants            | Sertraline                     | No sertraline or any other AD use                | 6 (40)                                                               | Pregnant women (first trimester)                                  | 6 (0-9)                                  | Moderate |
| Laporte, 2017                                       | Case-control and cohort                      | Severe bleeding at any site                                | SSRIs; S NRIs                  | No AD; No SSRI; Other AD; Neither SSRI nor NSAID | 1 (44)                                                               | Patients with a diagnosis of abnormal bleeding; surgical patients | 6 (0-17)                                 | Low      |
| Gao, 2017                                           | Cohort                                       | Congenital malformations in infants                        | Fluoxetine                     | No ADs or teratogens use                         | 8 (38)                                                               | Pregnant women (first trimester)                                  | 5 (2-9)                                  | Moderate |
| Biffi, 2017                                         | Case-control and cohort                      | Onset of acute heart disease; Cerebrovascular disease      | SSRIs; TCAs; Any other AD      | No ADs use                                       | 4 (31)                                                               | Patients with depression                                          | 9 (0-16)                                 | Moderate |
| Jiang, 2016                                         | Nested case-control, case-control and cohort | Postpartum hemorrhage                                      | SSRIs; Any other non-SSRIs use | No ADs use                                       | 1 (17)                                                               | Pregnant women (any trimester)                                    | 13 (7-22)                                | Low      |
| Healy, 2016                                         | Cohort                                       | Neurodevelopmental delay/spectrum disorders                | SSRI                           | No SSRIs                                         | 1 (17)                                                               | Pregnant women (any trimester)                                    | NR                                       | Moderate |
| Eke, 2016                                           | Cohort                                       | Preterm birth; respiratory distress syndrome               | SSRIs                          | No SSRIs                                         | 3 (16)                                                               | Pregnant women (first and third trimester)                        | 1.5 (0-5)                                | Moderate |
| Bérard, 2016                                        | Case-control and cohort                      | Major cardiac malformations                                | Paroxetine                     | No paroxetine use or no any other ADs use        | 6 (87)                                                               | Pregnant women (first trimester)                                  | 6 (1-15)                                 | Moderate |
| Undela, 2015                                        | Case-control and cohort                      | Myocardial infarction                                      | TCAs; SSRIs; Any other AD      | No ADs use                                       | 1 (21)                                                               | Patients with depression                                          | 10 (2-18)                                | Moderate |
| Singh, 2015                                         | Cohort                                       | Perioperative bleeding outcomes and/or any cause mortality | SSRIs+SNRIs; Any other ADs     | No SSRIs+SNRIs use or no any other ADs use       | 4 (19)                                                               | Pre-operative patients                                            | 8.6 (1-16)                               | Low      |

| Study<br>(see references 38-82 in<br>the main text) | Type of studies<br>included | Risks of adverse health<br>outcomes examined                           | Exposures                                                           | Non-exposures<br>(comparator)       | No of<br>associations<br>(no of<br>included<br>studies<br>estimates) | Population (s)                                                 | Average of<br>adjustment<br>s<br>(range) | AMSTAR2      |
|-----------------------------------------------------|-----------------------------|------------------------------------------------------------------------|---------------------------------------------------------------------|-------------------------------------|----------------------------------------------------------------------|----------------------------------------------------------------|------------------------------------------|--------------|
| Jiang, 2015                                         | Case-control<br>and cohort  | Upper GI bleeding                                                      | SSRIs+ NSAIDs +<br>acid-suppressing<br>drugs+ antiplatelet<br>drugs | No ADs use only                     | 2 (30)                                                               | Patients with various<br>disorders with a<br>diagnosis of UGIB | 9 (0-17)                                 | Moderate     |
| Shin, 2014                                          | Case-control<br>and cohort  | Stroke (intracerebral<br>hemorrhage and<br>subarachnoid hemorrhage)    | SSRIs                                                               | No SSRIs                            | 3 (23)                                                               | Patients with<br>depression                                    | 13 (4-31)                                | Low          |
| Huang, 2014                                         | Case-control<br>and cohort  | Low birth weight; Preterm<br>birth                                     | SSRIs; Any other<br>non-SSRIs use                                   | No ADs use                          | 2 (43)                                                               | Pregnant women (any<br>trimester)                              | NR                                       | Moderate     |
| Huybrechts, 2014                                    | Case-control<br>and cohort  | Spontaneous abortion                                                   | SSRIs                                                               | No SSRIs                            | 2 (20)                                                               | Pregnant women<br>(early and late<br>pregnancy)                | NR                                       | Moderate     |
| Grigoriadis, 2014                                   | Case-control<br>and cohort  | Pulmonary hypertension of<br>the newborn                               | SSRIs                                                               | No SSRIs or no<br>any other ADs use | 1 (3)                                                                | Pregnant women with<br>(early pregnancy)                       | 7 (4-10)                                 | Moderate     |
| Oh, 2014                                            | Case-control<br>and cohort  | Coronary heart disease                                                 | TCAs                                                                | No TCAs                             | 1 (14)                                                               | General population of<br>adults                                | NR                                       | Moderate     |
| Wu, 2013                                            | Case-control<br>and cohort  | Osteoporotic fractures                                                 | TCAs                                                                | No TCAs                             | 1 (12)                                                               | General population of<br>older adults                          | 12 (2-30)                                | Moderate     |
| Ross, 2013                                          | Cohort                      | Gestational age; APGAR<br>score                                        | TCAs; SSRIs; Any<br>other AD                                        | No ADs use                          | 3 (42)                                                               | Pregnant women (any<br>trimester)                              | 3 (0-21)                                 | Moderate     |
| Riggin, 2013                                        | Cohort                      | Congenital malformations in<br>infants                                 | Fluoxetine                                                          | No fluoxetine or<br>teratogens use  | 2 (38)                                                               | Pregnant women (first<br>trimester)                            | NR                                       | Moderate     |
| Grigoriadis, 2013                                   | Case-control<br>and cohort  | Poor neonatal adaptation;<br>Respiratory distress<br>syndrome; Tremors | TCAs; SSRIs;<br>SNRIs;Any other<br>AD                               | No ADs use                          | 3 (21)                                                               | Pregnant women (any<br>trimester)                              | 5 (4-7)                                  | Moderate     |
| Myles, 2013                                         | Case-control<br>and cohort  | Major malformations in<br>infants                                      | Citalopram                                                          | No ADs use                          | 2 (13)                                                               | Pregnant women (first<br>trimester)                            | NR                                       | High quality |

| Study<br>(see references 38-82 in<br>the main text) | Type of studies<br>included | Risks of adverse health<br>outcomes examined            | Exposures   | Non-exposures<br>(comparator)       | No of<br>associations<br>(no of<br>included<br>studies<br>estimates) | Population (s)                                   | Average of<br>adjustment<br>s<br>(range) | AMSTAR2        |
|-----------------------------------------------------|-----------------------------|---------------------------------------------------------|-------------|-------------------------------------|----------------------------------------------------------------------|--------------------------------------------------|------------------------------------------|----------------|
| Nikfar, 2012                                        | Case-control<br>and cohort  | Major malformations in<br>infants; Spontaneous abortion | SSRIs       | No SSRIs                            | 2 (28)                                                               | Pregnant women (any<br>trimester)                | NR                                       | Low            |
| Oderda, 2012                                        | Case-control<br>and cohort  | Hip Fracture                                            | Any AD      | No ADs use                          | 1 (18)                                                               | General population of<br>older adults            | 5 (0-19)                                 | Critically Low |
| Eom, 2012                                           | Case-control<br>and cohort  | Breast cancer                                           | Any AD      | No ADs use                          | 1 (18)                                                               | General population of<br>adults                  | 7 (1-13)                                 | Moderate       |
| Lee, 2012                                           | Case-control<br>and cohort  | Colon cancer                                            | SSRIs       | No SSRIs or no<br>any other ADs use | 1 (6)                                                                | General population of<br>adults and older adults | 6 (2-7)                                  | Moderate       |
| Cosgrove, 2011                                      | Case-control<br>and cohort  | Breast and ovarian cancer                               | SSRIs; TCAs | No ADs use                          | 2 (32)                                                               | General population of<br>adults                  | NR                                       | Low            |
| Barbui, 2009                                        | Case-control<br>and cohort  | Suicide attempt and<br>completion                       | SSRIs       | No SSRIs                            | 3 (14)                                                               | Patients with major<br>depressive disorders      | 6 (4-8)                                  | High quality   |
| Hemels, 2005                                        | Cohort                      | Spontaneous abortion                                    | Any AD      | No ADs use                          | 1 (11)                                                               | Pregnant women (any<br>trimester)                | NR                                       | Moderate       |

AD-antidepressants, AMSTAR2 – acronym of A Measurement Tool to Assess systematic Reviews, version 2, BMD – bone mineral density, APGAR – acronym of Appearance (skin color), Pulse (heart rate), Grimace (reflex irritability), Activity (muscle tone), and Respiration, GI – gastrointestinal, NR– non reported, RCTs – randomized controlled trials, SNRIs – serotonin–norepinephrine reuptake inhibitors, SARIs – serotonin antagonist and reuptake inhibitors, SSRIs – selective serotonin reuptake inhibitors, TCAs – tricyclic antidepressants, MAOIs – monoamine oxidase inhibitors, NSAIDs – Nonsteroidal anti-inflammatory drugs, UGIB – upper gastrointestinal bleeding.

**eTable 3.** Suggestive Evidence (Class III) for the Association of Antidepressant Use and Risk of Adverse Health Outcomes in Meta-analyses of Observational Studies

| Adverse health outcomes (author, year)                                            | Exposed/Unexposed                            | n  | Random-effects measure, ES (95% CI) | Results                          | Criteria used for classification of level of evidence |                      |                    |             |         |     |     |
|-----------------------------------------------------------------------------------|----------------------------------------------|----|-------------------------------------|----------------------------------|-------------------------------------------------------|----------------------|--------------------|-------------|---------|-----|-----|
|                                                                                   |                                              |    |                                     |                                  | N cases/ Cohort                                       | p-random effects     | I <sup>2</sup> (p) | PI (95% CI) | SSE/ESB | LS  | CE  |
| Pulmonary hypertension (pregnancy maternal exposure; Masarwa, 2019)               | SSRI or SNRI users/ No SSRI or SNRI users    | 11 | OR, 1.82 (1.31, 2.53)               | Increased risk for SSRIs or SNRI | 13 304/ 7 080 850                                     | 3.6x10 <sup>-4</sup> | 72 (<0.000)        | 0.73-4.56   | No/NP   | Yes | III |
| Pulmonary hypertension (late pregnancy exposure; Masarwa, 2019)                   | SSRI or SNRI users/ No SSRI or SNRI users    | 8  | OR, 2.09 (1.44, 3.02)               | Increased risk for SSRIs or SNRI | 12 678/ 5 979 785                                     | 9.2x10 <sup>-5</sup> | 76 (<0.000)        | 0.77-5.68   | No/No   | Yes | III |
| Autism spectrum disorders (Halvorsen, 2019)                                       | SSRI users/ No SSRI users                    | 9  | OR, 1.40 (1.22, 1.60)               | Increased risk for SSRIs         | 4 334/ 1 2682 40                                      | 9.7x10 <sup>-7</sup> | 15 (0.307)         | 1.09-1.79   | No/NP   | No  | III |
| Attention-deficit hyperactivity disorder (Halvorsen, 2019)                        | SSRI users/ No SSRI users                    | 5  | OR, 1.39 (1.17, 1.66)               | Increased risk for SSRIs         | 21 688/ 1 179 596                                     | 2.3x10 <sup>-4</sup> | 56 (0.061)         | 0.82-2.37   | No/NP   | Yes | III |
| Attention-deficit hyperactivity disorder in children (Jiang, 2018)                | Prenatal exposure to ADs/ No AD users        | 6  | RR, 1.34 (1.14,1.57)                | Increased risk for ADs           | 56 272/ 2 840 554                                     | 3.3x10 <sup>-4</sup> | 79 (<0.000)        | 0.81–2.21   | No/NP   | Yes | III |
| Attention-deficit hyperactivity disorder in children (2+3 trimester; Jiang, 2018) | Prenatal exposure to ADs/ No AD users        | 5  | RR, 1.37 (1.17,1.60)                | Increased risk for ADs           | 41 564/ 2 281 198                                     | 6.9x10 <sup>-5</sup> | 0 (0.754)          | 1.06-1.76   | No/NP   | Yes | III |
| Attention-deficit hyperactivity disorder in children (Man, 2018)                  | Pre-conception exposure to ADs/ Non-AD users | 5  | RR, 1.56 (1.24, 1.96)               | Increased risk for ADs           | 40147/ 1864720                                        | 1.4x10 <sup>-4</sup> | 58 (0.051)         | 0.75-3.22   | No/NP   | Yes | III |
| Cataract development (Fu, 2018)                                                   | SSRIs/non-users or no users of any other AD  | 6  | OR, 1.12 (1.06, 1.19)               | Increased risk for SSRIs         | 446956/ 1 955 042                                     | 8.8x10 <sup>-5</sup> | 92 (<0.000)        | 0.92-1.37   | Yes/Yes | Yes | III |

|                                                         |                                      |    |                       |                               |                   |                       |             |           |         |     |     |
|---------------------------------------------------------|--------------------------------------|----|-----------------------|-------------------------------|-------------------|-----------------------|-------------|-----------|---------|-----|-----|
| Cardiovascular malformations (Zhang, 2017)              | Any SSRI users/ Non-SSRI users       | 19 | RR, 1.26 (1.13, 1.39) | Increased risk for SSRIs      | 75362/ 7 368 339  | $2.1 \times 10^{-5}$  | 54 (0.003)  | 0.92-1.72 | No/NP   | Yes | III |
| Both atrial and ventricular septal defect (Zhang, 2017) | Any SSRI users/ Non-SSRI users       | 18 | RR, 1.27 (1.14, 1.42) | Increased risk for SSRIs      | 45247/ 10139043   | $1.6 \times 10^{-5}$  | 40 (0.041)  | 0.95-1.71 | No/NP   | Yes | III |
| Septal defects (Gao, 2017)                              | Fluoxetine/ No ADs or teratogens use | 8  | RR, 1.38 (1.19, 1.61) | Increased risk for fluoxetine | 39987/ 6438941    | $2.7 \times 10^{-5}$  | 0 (0.891)   | 1.14-1.67 | No/NP   | Yes | III |
| Cerebrovascular disease (Biffi, 2017)                   | SSRIs/ Non-SSRIs users               | 6  | RR, 1.26 (1.14, 1.39) | Increased risk for SSRIs      | 3204/ 280784      | $1.0 \times 10^{-5}$  | 14 (0.332)  | 1.02-1.55 | No/No   | Yes | III |
| Preterm birth (unadjusted estimates; Eke, 2016)         | SSRIs/ Non-SSRIs users               | 8  | OR, 1.59 (1.31, 1.92) | Increased risk for SSRIs      | 69 912/ 1 307 761 | $2.0 \times 10^{-5}$  | 92 (<0.000) | 0.91-2.78 | Yes/Yes | Yes | III |
| Respiratory distress syndrome (Eke, 2016)               | SSRIs/ Non-SSRIs users               | 5  | OR, 1.33 (1.14, 1.55) | Increased risk for SSRIs      | 19032/ 1269710    | $2.6 \times 10^{-4}$  | 83 (<0.000) | 0.83-2.12 | Yes/Yes | Yes | III |
| Major malformations (Bérard, 2016)                      | Paroxetine/ No paroxetine use        | 15 | OR, 1.23 (1.10, 1.38) | Increased risk for paroxetine | 26752/ 2 169 318  | $3.8 \times 10^{-4}$  | 3 (0.424)   | 1.06-1.43 | No/NP   | No  | III |
| Cardiac malformations (Bérard, 2016)                    | Paroxetine/ No paroxetine use        | 18 | OR, 1.28 (1.11, 1.47) | Increased risk for paroxetine | 75953/ 5109058    | $2.3 \times 10^{-5}$  | 0 (0.653)   | 1.09-1.49 | No/NP   | No  | III |
| Requirement of blood/RBC transfusion (Singh, 2015)      | SSRIs+SNRIs/ Non SADs users          | 7  | OR, 1.19 (1.09, 1.30) | Increased risk for SADs       | 79775/ 556120     | $1.0 \times 10^{-4}$  | 36 (0.155)  | 0.97-1.46 | No/No   | Yes | III |
| Upper gastrointestinal bleeding (Jiang, 2015)           | SSRIs/ Non-SSRIs users               | 8  | 1.95 (1.44, 1.93)     | Increased risk for SSRIs      | 32830/ 241266     | $1.2 \times 10^{-5}$  | 90 (<0.000) | 0.70-5.38 | No/NP   | Yes | III |
| Low birth weight (Huang, 2014)                          | Any AD users/ Non-AD users           | 15 | RR, 1.44 (1.21, 1.70) | Increased risk for ADs        | 20190/ 3001141    | $2.8 \times 10^{-5}$  | 61 (0.001)  | 0.88-2.32 | No/NP   | Yes | III |
| Preterm birth during late pregnancy (Huybrechts, 2015)  | Any AD users/ Non-AD users           | 12 | OR, 1.98 (1.65, 2.37) | Increased risk for ADs        | NR/ 1891969       | $2.4 \times 10^{-13}$ | 83 (<0.000) | 1.09-2.37 | Yes/NP  | Yes | III |

|                                 |                            |    |                             |                        |                |                      |             |             |        |     |     |
|---------------------------------|----------------------------|----|-----------------------------|------------------------|----------------|----------------------|-------------|-------------|--------|-----|-----|
| Gestational age<br>(Ross, 2013) | Any AD users/ Non-AD users | 16 | SMD, -0.23<br>(-0.33,-0.12) | Increased risk for ADs | 3419/<br>60644 | $3.9 \times 10^{-5}$ | 71 (<0.000) | -0.81, 0.36 | No/Yes | Yes | III |
|---------------------------------|----------------------------|----|-----------------------------|------------------------|----------------|----------------------|-------------|-------------|--------|-----|-----|

RBC–red blood cells, AD– antidepressants, TCAs – tricyclic antidepressants, SSRIs – selective serotonin reuptake inhibitors, SNRIs – serotonin–norepinephrine reuptake inhibitors, n – number of included studies per association, ES – effect size, N – number of cases, I<sup>2</sup> –heterogeneity, PI – prediction interval, CI – confidence interval, SSE – small-study effect, ESB – excess significance bias, LS – largest study with significant effect, CE – class of evidence, OR – odds ratio, RR – relative risk, SMD – standardized mean difference, NA– not applicable, NP – not pertinent because the number of observed studies is less than the expected.

**eTable 4.** Weak Evidence (Class IV) for the Association of Antidepressant Use and Risk of Adverse Health Outcomes in Meta-analyses of Observational Studies

| Adverse health outcomes (author, year)                                  | Exposed/Unexposed                                                 | n | Random-effects measure, ES (95% CI) | Results                  | Criteria used for classification of level of evidence |                      |                    |             |         |     |    |
|-------------------------------------------------------------------------|-------------------------------------------------------------------|---|-------------------------------------|--------------------------|-------------------------------------------------------|----------------------|--------------------|-------------|---------|-----|----|
|                                                                         |                                                                   |   |                                     |                          | N cases/ Cohort                                       | p-random effects     | I <sup>2</sup> (p) | PI (95% CI) | SSE/ESB | LS  | CE |
| Mental retardation (Halvorsen, 2019)                                    | SSRI users/ No SSRI users                                         | 2 | HR, 1.41 (1.03, 1.91)               | Increased risk for SSRIs | NR/ NR                                                | 0.030                | 0 (0.718)          | NA          | NA/NA   | No  | IV |
| Dementia (Wang, 2018)                                                   | SSRI users/ No SSRI users                                         | 5 | RR, 1.75 (1.03, 2.96)               | Increased risk for SSRIs | NR / 53955                                            | 0.037                | 98 (<0.000)        | 0.23–13.49  | No/NA   | Yes | IV |
| Dementia (Wang, 2018)                                                   | TCA users/ No SSRI users                                          | 4 | RR, 2.13 (1.43, 3.18)               | Increased risk for TCAs  | NR/ 22768                                             | 2.1x10 <sup>-4</sup> | 96 (<0.000)        | 0.34-13.54  | No/NA   | Yes | IV |
| Dementia (Wang, 2018)                                                   | MAOI users/ No MAOI users                                         | 2 | RR, 2.79 (1.09, 7.17)               | Increased risk for MAOIs | NR/ 12 209                                            | 0.033                | 80 (0.025)         | NA          | NA/NA   | Yes | IV |
| Attention-deficit hyperactivity disorder (first trimester; Jiang, 2018) | Prenatal exposure to ADs/ No AD users                             | 4 | RR, 1.28 (1.00,1.64)                | Increased risk for ADs   | 55988/ 293431                                         | 0.047                | 91 (<0.000)        | 0.41–4.01   | No/NP   | Yes | IV |
| Attention-deficit hyperactivity disorder in children (Jiang, 2018)      | Maternal psychiatric disorder without exposure versus no exposure | 3 | RR, 1.34 (1.08,1.67)                | Increased risk for ADs   | NR/ NR                                                | 0.007                | 60 (0.083)         | 0.13-13.88  | No/NA   | Yes | IV |
| Attention-deficit hyperactivity disorder in children (Jiang, 2018)      | SSRIs / Non-SSRIs users                                           | 5 | RR, 1.35 (1.13,1.61)                | Increased risk for ADs   | NR/ NR                                                | 0.001                | 86 (<0.000)        | 0.72-2.51   | No/NA   | Yes | IV |
| Attention-deficit hyperactivity disorder in children (Jiang, 2018)      | Non- SSRI antidepressant use/ Non-AD users                        | 6 | RR, 1.49 (1.22,1.83)                | Increased risk for ADs   | NR/ NR                                                | 1.2x10 <sup>-4</sup> | 0 (0.790)          | 1.12-1.99   | No/NA   | Yes | IV |
| Gestational hypertension or preeclampsia (Guan, 2018)                   | SSRI users/ No SSRI users                                         | 7 | RR, 1.21 (1.05, 1.40)               | Increased risk for SSRIs | 12097/ 1108261                                        | 0.007                | 71 (0.002)         | 0.81-1.82   | Yes/Yes | No  | IV |



|                                                     |                                              |    |                       |                                |                 |                      |            |           |        |     |    |
|-----------------------------------------------------|----------------------------------------------|----|-----------------------|--------------------------------|-----------------|----------------------|------------|-----------|--------|-----|----|
| Atrial septal defects (Gao, 2018)                   | Any SSRI users/ Non-SSRI users               | 7  | RR, 1.83 (1.22, 2.72) | Increased risk for SSRIs       | 6366/ 2560254   | 0.003                | 72 (0.002) | 0.53-6.31 | No/Yes | No  | IV |
| Septal defects (Gao, 2018)                          | Any SSRI users/ Non-SSRI users               | 6  | RR, 1.38 (1.00, 1.91) | Increased risk for SSRIs       | 8029/ 2039943   | 0.050                | 67 (0.009) | 0.50-3.80 | No/NP  | Yes | IV |
| Right ventricular outflow tract defects (Gao, 2018) | Any SSRI users/ Non-SSRI users               | 4  | RR, 1.38 (1.09, 1.75) | Increased risk for SSRIs       | 4307/ 2360018   | 0.007                | 33 (0.214) | 0.63-3.03 | No/NP  | Yes | IV |
| Gestational hypertension (Guan, 2018)               | SSRI users/ No SSRI users                    | 4  | RR, 1.14 (1.00-1.30)  | Increased risk for SSRIs       | 4370/ 91 282    | 0.048                | 6 (0.365)  | 0.79-1.64 | No/NP  | No  | IV |
| Dental implant failure (Chappuis, 2018)             | SSRI users/ No SSRI users                    | 2  | OR, 2.02 (1.42, 2.88) | Increased risk for SSRIs       | 341/ 5 332      | 9.8x10 <sup>-5</sup> | 0 (0.770)  | NA        | NA/No  | Yes | IV |
| GI bleeding (Na, 2018)                              | Mirtazapine/ no medication                   | 4  | OR, 1.17 (1.01,1.37)  | Increased risk for mirtazapine | 2116/ 59571     | 0.043                | 0 (0.593)  | 0.83-1.65 | No/NP  | No  | IV |
| Cataract development (Fu, 2018)                     | SNRIs/ non-users or no users of any other AD | 4  | OR, 1.13 (1.04, 1.24) | Increased risk for SNRIs       | 239390/ 646822  | 0.006                | 68 (0.026) | 0.79-1.63 | Yes/No | Yes | IV |
| Autism spectrum disorders (Zhou, 2018)              | Any AD users/ Non-AD users                   | 13 | OR, 1.28 (1.07, 1.53) | Increased risk for SSRIs       | 26695/ 2699647  | 0.007                | 62 (0.002) | 0.72-2.26 | No/NP  | No  | IV |
| Cardiovascular malformations (Shen, 2017)           | Sertraline users/Non-sertraline users        | 12 | OR, 1.36 (1.06, 1.74) | Increased risk for sertraline  | 57493/ 6468241  | 0.015                | 64 (0.001) | 0.66-2.79 | No/NP  | Yes | IV |
| Non-septal defects (Gao, 2017)                      | Fluoxetine/ No ADs or teratogens use         | 9  | RR, 1.39 (1.12, 1.73) | Increased risk for fluoxetine  | 14240/ 10822445 | 0.003                | 7 (0.374)  | 0.98-1.97 | No/NP  | Yes | IV |
| Preterm birth (adjusted) (Eke, 2016)                | SSRIs/ Non-SSRIs users                       | 3  | OR, 1.24 (1.09, 1.41) | Increased risk for SSRIs       | 66652/ 967061   | 0.001                | 73 (0.026) | 0.31-4.96 | No/NP  | Yes | IV |
| Major malformations (Bérard, 2016)                  | Paroxetine/ No any other SSRIs use           | 14 | OR, 1.19 (1.06, 1.34) | Increased risk for paroxetine  | 82965/ 4052678  | 0.003                | 0 (0.712)  | 1.05-1.35 | No/NP  | No  | IV |
| Major malformations (Bérard, 2016)                  | Paroxetine/ No any other ADs use             | 10 | OR, 1.19 (1.05, 1.35) | Increased risk for paroxetine  | 100735/ 5766472 | 0.008                | 0 (0.578)  | 1.02-1.38 | No/NP  | No  | IV |
| Cardiac malformations (Bérard, 2016)                | Paroxetine/No any other SSRIs use            | 17 | OR, 1.27 (1.10,1.47)  | Increased risk for paroxetine  | 75138/ 5103306  | 0.001                | 0 (0.596)  | 1.08-1.49 | No/NP  | No  | IV |

|                                                      |                                                |    |                         |                               |                 |                       |             |             |         |     |    |
|------------------------------------------------------|------------------------------------------------|----|-------------------------|-------------------------------|-----------------|-----------------------|-------------|-------------|---------|-----|----|
| Cardiac malformations (Bérard, 2016)                 | Paroxetine/ No any other ADs use               | 13 | OR, 1.23 (1.06, 1.43)   | Increased risk for paroxetine | 102941/ 6435313 | 0.006                 | 1 (0.436)   | 1.03-1.48   | No/NP   | No  | IV |
| Autistic Spectrum or related Disorders (Healy, 2016) | SSRIs / Non-SSRIs users                        | 17 | OR, 1.96 (1.33, 2.88)   | Increased risk for SSRIs      | 23641/ 2321521  | 0.001                 | 91 (<0.000) | 0.42-9.02   | No/NP   | Yes | IV |
| Ischemic stroke (Shin, 2014)                         | SSRIs / Non-SSRIs users                        | 6  | OR, 1.48 (1.08, 2.02)   | Increased risk for SSRIs      | 11080/ 724936   | 0.015                 | 84 (<0.000) | 0.50-4.35   | No/No   | No  | IV |
| Hemorrhagic stroke (Shin, 2014)                      | SSRIs / Non-SSRIs users                        | 11 | OR, 1.32 (1.02, 1.71)   | Increased risk for SSRIs      | 11513/ 399305   | 0.033                 | 75 (<0.000) | 0.57-3.07   | No/NP   | Yes | IV |
| All types of stroke (Shin, 2014)                     | SSRIs / Non-SSRIs users                        | 6  | OR, 1.40 (1.09, 1.80)   | Increased risk for SSRIs      | 3519/ 223986    | 0.008                 | 93 (<0.000) | 0.57-3.44   | No/Yes  | Yes | IV |
| Coronary heart disease (Oh, 2014)                    | TCAs/ Non-TCAs users                           | 14 | OR, 1.51 (1.07, 2.12)   | Increased risk for TCAs       | 6443/ 347750    | 0.019                 | 97 (<0.000) | 0.41-5.56   | No/NP   | Yes | IV |
| Apgar score at 1 minute (Ross, 2013)                 | Any AD users/ Non-AD users                     | 11 | SMD,-0.19 (-0.30,-0.08) | Increased risk for ADs        | 714/ 1534       | 0.001                 | 7 (0.376)   | -0.72, 0.34 | No/NP   | No  | IV |
| Cardiovascular malformations (Riggin, 2013)          | Fluoxetine/ Non fluoxetine or teratogens users | 16 | OR, 1.60 (1.32, 1.95)   | Increased risk for fluoxetine | 35702/ 3401555  | 2.4x10 <sup>-6</sup>  | 1 (0.441)   | 1.27-2.02   | No/NP   | No  | IV |
| Poor neonatal adaptation (Grigoriadis, 2013)         | Any AD users/ Non-AD users                     | 8  | OR, 5.06 (3.25, 7.89)   | Increased risk for ADs        | 75/ 986         | 7.8x10 <sup>-13</sup> | 0 (0.617)   | 2.91-8.81   | No/No   | Yes | IV |
| Respiratory distress syndrome (Grigoriadis, 2013)    | Any AD users/ No AD users                      | 9  | OR, 2.20 (1.81, 2.66)   | Increased risk for ADs        | 623/ 583525     | 1.3x10 <sup>-15</sup> | 38 (0.115)  | 1.43-3.37   | Yes/Yes | Yes | IV |
| Tremors (Grigoriadis, 2013)                          | Any AD users/ Non-AD users                     | 4  | OR, 7.90 (3.33, 18.73)  | Increased risk for ADs        | 60/ 482         | 2.7x10 <sup>-6</sup>  | 45 (0.144)  | 0.35-177.44 | No/Yes  | Yes | IV |
| Major malformations (Nikfar, 2013)                   | SSRIs / Non-SSRIs users                        | 21 | OR, 1.23 (1.08, 1.41)   | Increased risk for SSRIs      | 60753/ 1761861  | 0.002                 | 25 (0.146)  | 0.91-1.68   | Yes/No  | No  | IV |
| Spontaneous abortion (Nikfar, 2013)                  | SSRIs / Non-SSRIs users                        | 7  | OR, 1.85 (1.41, 2.42)   | Increased risk for SSRIs      | 376/ 4140       | 9.6x10 <sup>-6</sup>  | 3 (0.403)   | 1.25-2.74   | No/No   | No  | IV |

|                                                         |                            |    |                       |                          |               |                      |            |           |        |    |    |
|---------------------------------------------------------|----------------------------|----|-----------------------|--------------------------|---------------|----------------------|------------|-----------|--------|----|----|
| Breast and ovarian cancer (Cosgrove, 2011)              | SSRIs / Non-SSRIs users    | 16 | OR, 1.05 (1.01, 1.10) | Increased risk for SSRIs | 46796/1059784 | 0.010                | 15 (0.287) | 0.98-1.14 | Yes/No | No | IV |
| Suicide attempt and completion in adults (Barbui, 2009) | SSRIs / Non-SSRIs users    | 2  | OR, 0.47 (0.27, 0.80) | Decreased risk for SSRIs | 107/178529    | 4.1x10 <sup>-9</sup> | 0 (0.555)  | NA        | NA/NP  | No | IV |
| Spontaneous abortion (Hemels, 2005)                     | Any AD users/ Non-AD users | 11 | OR, 1.46 (1.19, 1.79) | Increased risk for ADs   | 373/3194      | 2.8x10 <sup>-3</sup> | 0 (0.981)  | 1.15-1.85 | No/NP  | No | IV |

AD—antidepressants, APGAR – acronym of Appearance (skin color), Pulse (heart rate), Grimace (reflex irritability), Activity (muscle tone), and Respiration, TCAs – tricyclic antidepressants, SSRIs – selective serotonin reuptake inhibitors, SNRIs – serotonin–norepinephrine reuptake inhibitors, n – number of included studies per association, ES – effect size, N – number of cases, I<sup>2</sup> –heterogeneity, PI – prediction interval, CI – confidence interval, SSE – small-study effect, ESB –excess significance bias, LS – largest study with significant effect, CE – class of evidence, OR – odds ratio, RR – relative risk, NA– not applicable, NP – not pertinent because the number of observed studies is less than the expected.

**eTable 5.** No Evidence (Nonsignificant Associations,  $P > 0.05$ ) for the Association of Antidepressant Use and Risk of Adverse Health Outcomes in Meta-analyses of Observational Studies

| Adverse health outcomes (author, year)                             | Exposed/Unexposed                                                   | n | Random-effect measure, ES (95% CI) | Results             | Criteria used for classification of level of evidence |                   |                    |             |          |     |    |
|--------------------------------------------------------------------|---------------------------------------------------------------------|---|------------------------------------|---------------------|-------------------------------------------------------|-------------------|--------------------|-------------|----------|-----|----|
|                                                                    |                                                                     |   |                                    |                     | N cases/Cohort                                        | p- random effects | I <sup>2</sup> (p) | PI (95% CI) | SSE/ES B | LS  | CE |
| Major congenital anomalies (Gao, 2018)                             | Maternal psychiatric disorder with SSRI exposure versus no exposure | 4 | RR, 1.03 (0.95, 1.13)              | No evidence of risk | 63383/1851983                                         | 0.439             | 3 (0.380)          | 0.85-2.26   | No/No    | No  | NS |
| Cardiovascular malformations (Gao, 2018)                           | Maternal psychiatric disorder with SSRI exposure versus no exposure | 6 | RR, 1.06 (0.89, 1.26)              | No evidence of risk | 22192/2685027                                         | 0.489             | 34 (0.182)         | 0.71-1.60   | No/NP    | No  | NS |
| Left ventricular outflow tract defects (Gao, 2018)                 | SSRIs / Non-SSRIs users                                             | 3 | RR, 1.08 (0.81, 1.44)              | No evidence of risk | 3117/1410514                                          | 0.616             | 0 (0.892)          | 0.17-6.99   | No/NP    | No  | NS |
| Ventricular septal defect (Gao, 2018)                              | SSRIs / Non-SSRIs users                                             | 8 | RR, 1.10 (0.93, 1.29)              | No evidence of risk | 13647/3509759                                         | 0.232             | 36 (0.140)         | 0.76-1.60   | NA/NP    | Yes | NS |
| BMD Lumbar Spine (Schweiger, 2018)                                 | SSRIs / Non-SSRIs users                                             | 2 | SMD, -0.03 (-0.43, 0.38)           | No evidence of risk | NR/2100                                               | 0.897             | 71 (0.065)         | NA          | NA/No    | Yes | NS |
| BMD Femoral Neck (Schweiger, 2018)                                 | TCAs / Non-TCAs users                                               | 2 | SMD, 0.02 (-0.14, 0.18)            | No evidence of risk | NR/3851                                               | 0.786             | 0 (0.545)          | NA          | NA/NP    | No  | NS |
| BMD Total Hip (Schweiger, 2018)                                    | SSRIs / Non-SSRIs users                                             | 2 | SMD, 0.10 (-0.38, 0.59)            | No evidence of risk | NR/4694                                               | 0.677             | 98 (<0.000)        | NA          | NA/No    | Yes | NS |
| BMD Total Hip (Schweiger, 2018)                                    | TCAs / Non-TCAs users                                               | 2 | SMD, 0.03 (-0.12, 0.17)            | No evidence of risk | NR/4694                                               | 0.719             | 0 (0.644)          | NA          | NA/NP    | No  | NS |
| Attention-deficit hyperactivity disorder in children (Jiang, 2018) | Exposure versus maternal psychiatric disorder without exposure      | 2 | RR, 0.96 (0.76,1.20)               | No evidence of risk | NR/NR                                                 | 0.714             | 0 (0.524)          | NA          | NA/NA    | No  | NS |

|                                                                    |                             |   |                       |                     |                |       |             |            |        |    |    |
|--------------------------------------------------------------------|-----------------------------|---|-----------------------|---------------------|----------------|-------|-------------|------------|--------|----|----|
| Attention-deficit hyperactivity disorder in children (Jiang, 2018) | Sibling matched             | 3 | RR, 0.88 (0.70,1.11)  | No evidence of risk | NR/ NR         | 0.293 | 0 (0.486)   | 0.20-3.99  | Yes/NA | No | NS |
| Preeclampsia (Guan, 2018)                                          | SSRI users/ No SSRI users   | 5 | RR, 1.32 (0.98-1.78)  | No evidence of risk | 7 727/ 201 181 | 0.071 | 83 (<0.000) | 0.47-3.70  | No/No  | No | NS |
| GI bleeding (Na, 2018)                                             | Mirtazapine/SSRIs           | 4 | OR, 1.03 (0.89,1.19)  | No evidence of risk | 2116/ 59571    | 0.689 | 0 (0.806)   | 0.75 -1.41 | No/NP  | No | NS |
| Any other type of bleeding (Na, 2018)                              | Bupropion/SSRIs             | 3 | OR, 0.90 (0.68,1.18)  | No evidence of risk | 1228/ 16223    | 0.443 | 0 (0.886)   | 0.15-5.24  | No/NP  | No | NS |
| Both GI and any other type of bleeding (Na, 2018)                  | Mirtazapine/SSRIs           | 5 | OR, 0.98 (0.98,1.14)  | No evidence of risk | 2751/ 63545    | 0.766 | 6 (0.371)   | 0.77-1.25  | No/NP  | No | NS |
| Both GI and any other type of bleeding (Na, 2018)                  | Mirtazapine/ no medication  | 4 | OR, 1.12 (0.97,1.29)  | No evidence of risk | 2116/ 59571    | 0.131 | 0 (0.619)   | 0.81-1.53  | No/NP  | No | NS |
| Transfusion of FFP (Eckersley, 2018)                               | SSRIs users/ Non-SSRI users | 3 | OR, 0.96 (0.74,1.24)  | No evidence of risk | 8510/ 139711   | 0.754 | 60 (0.083)  | 0.06-14.93 | No/NP  | No | NS |
| Transfusion of platelets (Eckersley, 2018)                         | SSRIs users/ Non-SSRI users | 3 | OR, 0.93 (0.78, 1.11) | No evidence of risk | 4424/ 139711   | 0.418 | 5 (0.349)   | 0.26-3.28  | No/NP  | No | NS |
| Re-operation for bleeding (Eckersley, 2018)                        | SSRIs users/ Non-SSRI users | 3 | OR, 1.07 (0.66, 1.74) | No evidence of risk | 446/ 11955     | 0.783 | 0 (0.964)   | 0.05-25.20 | No/NP  | No | NS |
| Thirty-day mortality (Eckersley, 2018)                             | SSRIs users/ Non-SSRI users | 5 | OR, 1.03 (0.91, 1.16) | No evidence of risk | 6668/ 270103   | 0.664 | 0 (0.814)   | 0.84-1.26  | No/NP  | No | NS |

|                                           |                                                                 |   |                       |                     |              |       |            |             |        |     |    |
|-------------------------------------------|-----------------------------------------------------------------|---|-----------------------|---------------------|--------------|-------|------------|-------------|--------|-----|----|
| Autism spectrum disorders (Morales, 2018) | Any AD users/ Non-AD users with a history of affective disorder | 6 | RR, 1.18 (0.91, 1.52) | No evidence of risk | 7780/1052964 | 0.192 | 51 (0.069) | 0.58 -2.40  | No/NP  | No  | NS |
| Nervous system (Shen, 2017)               | Sertaline users/Non-sertraline users                            | 6 | OR, 1.43 (0.88, 2.32) | No evidence of risk | 416/1975394  | 0.149 | 0 (0.976)  | 0.72-2.84   | No/NP  | No  | NS |
| Digestive system (Shen, 2017)             | Sertaline users/Non-sertraline users                            | 5 | OR, 1.23 (0.76, 1.98) | No evidence of risk | 720/1657603  | 0.407 | 0 (0.805)  | 0.56-2.68   | No/NP  | No  | NS |
| Eye, ear, face and neck (Shen, 2017)      | Sertaline users/Non-sertraline users                            | 4 | OR, 1.08 (0.33, 3.55) | No evidence of risk | 316/1839470  | 0.902 | 32 (0.219) | 0.02-56.42  | No/NP  | No  | NS |
| Urogenital system (Shen, 2017)            | Sertaline users/Non-sertraline users                            | 8 | OR, 1.03 (0.73,1.46)  | No evidence of risk | 1638/1676096 | 0.869 | 0 (0.755)  | 0.67-1.59   | Yes/NP | No  | NS |
| Musculoskeletal system (Shen, 2017)       | Sertaline users/Non-sertraline users                            | 5 | OR, 0.97 (0.69, 1.36) | No evidence of risk | 1694/1657603 | 0.861 | 0 (0.723)  | 0.56-1.68   | No/NP  | No  | NS |
| Nervous system malformations (Gao, 2017)  | Fluoxetine/ No ADs or teratogens use                            | 3 | RR, 1.37 (0.83, 2.25) | No evidence of risk | 2925/1817322 | 0.219 | 0 (0.526)  | 0.05-34.60  | No/NP  | No  | NS |
| Eye malformations (Gao, 2017)             | Fluoxetine/ No ADs or teratogens use                            | 3 | RR, 1.30 (0.53, 3.17) | No evidence of risk | 2585/1270645 | 0.564 | 0 (0.399)  | 0.00-420.44 | No/NP  | No  | NS |
| Urogenital malformations (Gao, 2017)      | Fluoxetine/ No ADs or teratogens use                            | 5 | RR, 1.02 (0.65, 1.59) | No evidence of risk | 4244/2262620 | 0.932 | 39 (0.159) | 0.00-3.50   | No/NP  | Yes | NS |
| Digestive malformations (Gao, 2017)       | Fluoxetine/ No ADs or teratogens use                            | 3 | RR, 1.08 (0.60, 1.96) | No evidence of risk | 2019/1816416 | 0.800 | 0 (0.861)  | 0.02-51.29  | No/NP  | No  | NS |

|                                                                    |                                               |    |                       |                     |                 |       |             |             |        |     |    |
|--------------------------------------------------------------------|-----------------------------------------------|----|-----------------------|---------------------|-----------------|-------|-------------|-------------|--------|-----|----|
| Respiratory malformations (Gao, 2017)                              | Fluoxetine/ No ADs or teratogens use          | 3  | RR, 1.38 (0.69, 2.78) | No evidence of risk | 472/ 1814869    | 0.361 | 0 (0.670)   | 0.02-127.68 | No/NP  | No  | NS |
| Musculoskeletal malformations (Gao, 2017)                          | Fluoxetine/ No ADs or teratogens use          | 4  | RR, 0.82 (0.54, 1.22) | No evidence of risk | 1474/ 1910723   | 0.322 | 0 (0.726)   | 0.34-1.98   | Yes/NP | No  | NS |
| Acute heart disease (Biffi, 2017)                                  | Any AD users/ Non-AD users                    | 7  | RR, 1.35 (0.91, 2.02) | No evidence of risk | 65331/ 818933   | 0.138 | 92 (<0.000) | 0.35-5.19   | No/NP  | Yes | NS |
| Acute heart disease (Biffi, 2017)                                  | SSRIs/ Non-SSRIs users                        | 14 | RR, 1.00 (0.83,1.22)  | No evidence of risk | 89421/ 818337   | 0.961 | 85 (<0.000) | 0.53-1.90   | Yes/NP | Yes | NS |
| Cerebrovascular disease (Biffi, 2017)                              | TCAs/ Non-TCAs users                          | 4  | RR, 1.06 (0.96, 1.17) | No evidence of risk | 7325/ 278749    | 0.239 | 0 (0.745)   | 0.85-1.32   | No/NP  | No  | NS |
| Preterm birth (Huybrechts, 2015)                                   | Any AD users in early pregnancy/ Non-AD users | 8  | OR, 1.15 (0.96, 1.38) | No evidence of risk | NR/ 1371456     | 0.127 | 85 (<0.000) | 0.64-2.07   | No/NP  | Yes | NS |
| Myocardial infarction (Undela, 2015)                               | Any AD users/ Non-AD users                    | 21 | RR, 1.03 (0.88, 1.22) | No evidence of risk | 220362/ 1793877 | 0.687 | 98 (<0.000) | 0.51-2.08   | No/NP  | Yes | NS |
| Requirement of reoperation for bleeding complication (Singh, 2015) | SSRIs+SNRIs/ Non SADs users                   | 4  | OR, 1.48 (0.84, 2.62) | No evidence of risk | 676/ 26743      | 0.176 | 54 (0.089)  | 0.17-13.06  | No/NP  | Yes | NS |
| Mortality-any cause (Singh, 2015)                                  | SSRIs+SNRIs/ Non SADs users                   | 5  | OR, 1.15 (0.86, 1.53) | No evidence of risk | 79683/ 554079   | 0.343 | 76 (0.002)  | 0.46-2.88   | No/No  | Yes | NS |

|                                                           |                                                  |    |                       |                     |                 |       |            |              |        |    |    |
|-----------------------------------------------------------|--------------------------------------------------|----|-----------------------|---------------------|-----------------|-------|------------|--------------|--------|----|----|
| Requirement of RBC transfusion (Singh, 2015)              | Any other AD users/ Non-any other AD users       | 3  | OR, 1.03 (0.74, 1.43) | No evidence of risk | 216/ 5495       | 0.874 | 0 (0.790)  | 0.12-8.88    | No/NP  | No | NS |
| Pulmonary hypertension of the newborn (Grigoriadis, 2014) | SSRIs early in pregnancy/ Non-SSRIs users        | 3  | OR,1.22 (0.58, 2.60)  | No evidence of risk | 49/ 13017       | 0.600 | 78 (0.010) | 0.00-7225.40 | No/NP  | No | NS |
| Major malformations (Riggin, 2013)                        | Fluoxetine/ No fluoxetine or teratogens use      | 22 | OR,1.12 (0.98, 1.28)  | No evidence of risk | 163333/ 4576977 | 0.109 | 29 (0.106) | 0.78-1.61    | No/NP  | No | NS |
| Cardiovascular malformations (Myles, 2013)                | Citalopram during first trimester / Non-AD users | 6  | OR, 0.99 (0.75, 1.30) | No evidence of risk | NR/NR           | 0.459 | 34 (0.183) | 0.51-1.92    | No/NA  | No | NS |
| Major malformations (Myles, 2013)                         | Citalopram during first trimester Non-AD users   | 7  | OR, 1.04 (0.92, 1.17) | No evidence of risk | NR/NR           | 0.254 | 0 (0.858)  | 0.89-1.21    | No/NA  | No | NS |
| Breast cancer (Eom, 2012)                                 | Any AD users/ Non-AD users                       | 18 | OR,1.02 (0.96, 1.08)  | No evidence of risk | 65313/ 739891   | 0.574 | 36 (0.063) | 0.87-1.18    | Yes/NP | No | NS |
| Colon cancer (Lee, 2012)                                  | SSRIs / Non-SSRIs users or any other ADs         | 6  | OR, 0.89 (0.79, 1.01) | No evidence of risk | 11710/ 978578   | 0.071 | 41 (0.131) | 0.66-1.21    | No/No  | No | NS |
| Breast and ovarian cancer (Cosgrove, 2011)                | TCAs/Non-TCAs                                    | 16 | OR, 1.03 (0.98,1.09)  | No evidence of risk | 37923/ 426545   | 0.251 | 47 (0.021) | 0.88-1.22    | No/NP  | No | NS |

GI – gastrointestinal, RBC–red blood cells, FFP– fresh frozen plasma, BMD – bone mineral density, AD– antidepressants, TCAs – tricyclic antidepressants, SSRIs – selective serotonin reuptake inhibitors, SNRIs – serotonin–norepinephrine reuptake inhibitors, SADs– serotonergic antidepressants, n – number of included studies per association, ES – effect size, N – number of cases, I<sup>2</sup> –heterogeneity, PI – prediction interval, CI – confidence interval, SSE – small-study effect, ESB –excess significance bias, LS – largest study with significant effect, CE – class of evidence, CES= OR – odds ratio, RR – relative risk, HR– hazard ratio, SMD – standardized mean difference, NA– not applicable, NP – not pertinent because the number of observed studies is less than the expected.



**eTable 6.** Sensitivity Analysis Results of Nonselected Meta-analyses Due to Overlap

| Author, year     | Risk of adverse health outcome    | Antidepressant exposure                    | Number of cases / total population | Number of study estimates | Study design         | Effect metrics | Random effects summary estimate (95% CI) | Random effects summary estimate P value | Largest study summary estimate (95% CI) | I <sup>2</sup> (%) | Egger P value | 95% prediction interval | Level of evidence |
|------------------|-----------------------------------|--------------------------------------------|------------------------------------|---------------------------|----------------------|----------------|------------------------------------------|-----------------------------------------|-----------------------------------------|--------------------|---------------|-------------------------|-------------------|
| Ng, 2019         | Persistent pulmonary hypertension | SSRI during pregnancy                      | 397 / 7470566                      | 9                         | Cohort, case-control | OR             | 1.94 (1.37, 2.76)                        | 2.1x10 <sup>-3</sup>                    | 0.79 (0.08, 7.84)                       | 88                 | 0.95          | 0.70, 5.39              | Weak              |
| Kaplan, 2017     | Autism spectrum disorders         | Maternal psychiatric disorder without SSRI | 100 / 36925                        | 2                         | Cohort               | OR             | 1.81 (1.44, 2.29)                        | 6.0x10 <sup>-7</sup>                    | 2.02 (1.53, 2.66)                       | 20                 | 0.00          | NA                      | Weak              |
| Mezzacappa, 2017 | Autism spectrum disorders         | Antidepressant during preconception period | 8040 / 69219                       | 4                         | Case-control         | OR             | 1.77 (1.49, 2.09)                        | 3.3x10 <sup>-11</sup>                   | 1.90 (1.50, 2.40)                       | 0                  | 0.98          | 1.22, 2.56              | Convincing        |
| Rais, 2014       | Autism spectrum disorders         | Antidepressant during pregnancy            | 5040 / 50187                       | 3                         | Case-control         | OR             | 1.50 (0.74, 3.03)                        | 0.260                                   | 2.18 (1.37, 3.46)                       | 84                 | 0.87          | 0.00, 7910.38           | No association    |
| Mezzacappa, 2017 | Autism spectrum disorders         | Antidepressant during pregnancy            | 17318 / 889256                     | 7                         | Cohort, case-control | OR             | 1.41 (1.12, 1.78)                        | 0.003                                   | 1.46 (1.17, 1.82)                       | 63                 | 0.85          | 0.72, 2.78              | Weak              |
| Mezzacappa, 2017 | Autism spectrum disorders         | Antidepressant during pregnancy            | 4849 / 772331                      | 2                         | Cohort               | HR             | 1.26 (0.91, 1.74)                        | 0.160                                   | 1.46 (1.17, 1.82)                       | 67                 | 0.00          | NA                      | No association    |
| Mezzacappa, 2017 | Autism spectrum disorders         | Antidepressant during pregnancy            | 12469 / 116925                     | 5                         | Case-control         | OR             | 1.52 (1.09, 2.13)                        | 0.014                                   | 1.9 (1.48, 2.44)                        | 61                 | 0.61          | 0.52, 4.44              | Weak              |
| Mezzacappa, 2017 | Autism spectrum disorders         | Antidepressant during the first trimester  | 17318 / 889256                     | 7                         | Cohort, case-control | OR             | 1.55 (1.19, 2.03)                        | 0.001                                   | 1.46 (1.17, 1.82)                       | 68                 | 0.78          | 0.70, 3.44              | Weak              |
| Mezzacappa, 2017 | Autism spectrum disorders         | Antidepressant during the first trimester  | 4849 / 772331                      | 2                         | Cohort               | HR             | 1.26 (0.91, 1.74)                        | 0.161                                   | 1.46 (1.17, 1.82)                       | 67                 | 0.00          | NA                      | No association    |

|                         |                           |                                                                    |                |   |                      |    |                   |                      |                   |    |      |             |                   |
|-------------------------|---------------------------|--------------------------------------------------------------------|----------------|---|----------------------|----|-------------------|----------------------|-------------------|----|------|-------------|-------------------|
| <b>Mezzacappa, 2017</b> | Autism spectrum disorders | Antidepressant during the first trimester                          | 12469 / 116925 | 5 | Case-control         | OR | 1.79 (1.27, 2.52) | 1.0x10 <sup>-3</sup> | 2.05 (1.58, 2.66) | 55 | 0.76 | 0.62, 5.13  | Suggestive        |
| <b>Mezzacappa, 2017</b> | Autism spectrum disorders | Antidepressant during the second trimester                         | 8040 / 69219   | 4 | Case-control         | OR | 1.67 (1.14, 2.45) | 0.009                | 2.30 (1.63, 3.24) | 38 | 0.38 | 0.44, 6.33  | Weak              |
| <b>Mezzacappa, 2017</b> | Autism spectrum disorders | Antidepressant during the third trimester                          | 8040 / 69219   | 4 | Case-control         | OR | 1.54 (0.82, 2.90) | 0.180                | 2.69 (1.81, 4.00) | 73 | 0.55 | 0.11, 22.57 | No association    |
| <b>Kaplan, 2016</b>     | Autism spectrum disorders | Non-SSRI antidepressant during pregnancy                           | 3354 / 25728   | 3 | Case-control         | OR | 2.05 (1.20, 3.49) | 0.008                | 1.93 (0.88, 4.24) | 0  | 0.89 | 0.07, 64.16 | Weak              |
| <b>Kaplan, 2017</b>     | Autism spectrum disorders | SSRI discontinuation until 3 months before pregnancy vs. unexposed | 3852 / 652201  | 2 | Cohort               | RR | 1.31 (0.98, 1.74) | 0.065                | 1.46 (1.17, 1.82) | 46 | 0.00 | NA          | No association    |
| <b>Kaplan, 2016</b>     | Autism spectrum disorders | SSRI during preconception period                                   | 6890 / 64569   | 3 | Case-control         | OR | 1.84 (1.48, 2.28) | 2.4x10 <sup>-8</sup> | 1.90 (1.50, 2.40) | 0  | 0.78 | 0.46, 7.35  | Highly suggestive |
| <b>Man, 2015</b>        | Autism spectrum disorders | SSRI during pregnancy                                              | 10424 / 107688 | 4 | Case-control         | OR | 1.81 (1.47, 2.24) | 3.3x10 <sup>-8</sup> | 1.80 (1.40, 2.31) | 0  | 0.94 | 1.14, 2.88  | Convincing        |
| <b>Kobayashi, 2016</b>  | Autism spectrum disorders | SSRI during pregnancy                                              | 10664 / 988245 | 7 | Cohort, case-control | OR | 1.45 (1.15, 1.81) | 0.002                | 1.20 (0.90, 1.60) | 31 | 0.18 | 0.86, 2.43  | Weak              |
| <b>Kobayashi, 2016</b>  | Autism spectrum disorders | SSRI during pregnancy                                              | 4068 / 632851  | 2 | Cohort               | OR | 1.69 (0.80, 3.56) | 0.170                | 1.20 (0.90, 1.60) | 82 | 0.00 | NA          | No association    |
| <b>Kobayashi, 2016</b>  | Autism spectrum disorders | SSRI during pregnancy                                              | 6596 / 355394  | 5 | Case-control         | OR | 1.38 (1.08, 1.75) | 0.009                | 1.35 (0.94, 1.93) | 0  | 0.38 | 0.93, 2.03  | Weak              |
| <b>Kaplan, 2016</b>     | Autism spectrum disorders | SSRI during pregnancy                                              | 9061 / 83905   | 5 | Case-control         | OR | 1.65 (1.23, 2.23) | 1.0x10 <sup>-3</sup> | 1.90 (1.47, 2.45) | 38 | 0.76 | 0.73, 3.73  | Suggestive        |
| <b>Brown, 2017</b>      | Autism spectrum disorders | SSRI during pregnancy                                              | 8695 / 798967  | 6 | Cohort, case-control | OR | 1.44 (1.12, 1.85) | 0.005                | 1.20 (0.90, 1.60) | 24 | 0.19 | 0.82, 2.52  | Weak              |

|                          |                                 |                                                                                                         |                 |    |                      |    |                   |                       |                   |    |      |             |                |
|--------------------------|---------------------------------|---------------------------------------------------------------------------------------------------------|-----------------|----|----------------------|----|-------------------|-----------------------|-------------------|----|------|-------------|----------------|
| <b>Brown, 2017</b>       | Autism spectrum disorders       | SSRI during pregnancy                                                                                   | 4849 / 772427   | 2  | Cohort               | RR | 1.54 (0.86, 2.75) | 0.153                 | 1.20 (0.90, 1.60) | 70 | 0.00 | NA          | No association |
| <b>Brown, 2017</b>       | Autism spectrum disorders       | SSRI during pregnancy                                                                                   | 3846 / 26540    | 4  | Case-control         | OR | 1.44 (1.02, 2.02) | 0.037                 | 1.00 (0.59, 1.68) | 7  | 0.37 | 0.62, 3.35  | Weak           |
| <b>Kaplan, 2017</b>      | Autism spectrum disorders       | SSRI during pregnancy                                                                                   | 3992 / 679410   | 3  | Cohort               | HR | 1.61 (1.16, 2.25) | 0.005                 | 1.40 (1.02, 1.92) | 46 | 0.33 | 0.06, 44.64 | Weak           |
| <b>Kaplan, 2016</b>      | Autism spectrum disorders       | SSRI during the first trimester                                                                         | 7382 / 65381    | 4  | Case-control         | OR | 1.91 (1.28, 2.83) | 0.001                 | 2.00 (1.54, 2.60) | 42 | 0.98 | 0.46, 7.91  | Weak           |
| <b>Brown, 2017</b>       | Autism spectrum disorders       | SSRI during the first trimester                                                                         | 3846 / 26540    | 4  | Case-control         | OR | 1.75 (1.16, 2.63) | 0.007                 | 1.30 (0.72, 2.36) | 21 | 0.64 | 0.51, 5.95  | Weak           |
| <b>Kaplan, 2016</b>      | Autism spectrum disorders       | SSRI during the second trimester                                                                        | 7382 / 65381    | 4  | Case-control         | OR | 1.73 (1.15, 2.61) | 0.008                 | 2.30 (1.63, 3.25) | 29 | 0.28 | 0.46, 6.58  | Weak           |
| <b>Kaplan, 2016</b>      | Autism spectrum disorders       | SSRI during the third trimester                                                                         | 7382 / 65381    | 4  | Case-control         | OR | 1.64 (0.83, 3.24) | 0.163                 | 2.70 (1.81, 4.03) | 68 | 0.56 | 0.10, 26.8  | No association |
| <b>Wang, 2015</b>        | Risk of Heart Defects           | SSRI during pregnancy                                                                                   | NR / 2010180    | 4  | Cohort               | OR | 1.22 (0.89, 1.67) | 0.210                 | 1.60 (1.10, 1.30) | 92 | 0.50 | 0.31, 4.88  | No association |
| <b>McDonagh, 2014</b>    | Preterm birth                   | Antidepressant during pregnancy                                                                         | NR / 304        | 2  | Cohort, case-control | OR | 1.84 (0.79, 4.27) | 0.155                 | 1.73 (0.63, 4.58) | 0  | NA   | NA          | No association |
| <b>Anglin, 2014</b>      | Upper gastrointestinal bleeding | SSRIs + or NSAIDs (Patients with various disorders with a diagnosis of upper gastrointestinal bleeding) | 85628 / 1020230 | 19 | Cohort, case-control | OR | 1.66 (1.44, 1.91) | 8.2x10 <sup>-13</sup> | 1.06 (0.57, 1.97) | 82 | 0.80 | 0.93, 2.95  | Suggestive     |
| <b>Painfully, 2013</b>   | Cardiovascular malformations    | Paroxetine during first trimester                                                                       | 23746 / 1473816 | 11 | Cohort               | RR | 1.25 (1.01, 1.54) | 0.041                 | 1.03 (0.80, 1.33) | 30 | 0.95 | 0.78, 2.01  | Weak           |
| <b>Grigoriadis, 2013</b> | Major malformations             | SSRI during first trimester                                                                             | NR / 789337     | 12 | Cohort, case-control | RR | 0.93 (0.85, 1.02) | 0.121                 | 0.78 (0.45, 1.36) | 0  | 0.26 | 0.83, 1.03  | No association |
| <b>Grigoriadis, 2013</b> | Cardiovascular malformations    | SSRI during first trimester                                                                             | NR / 345203     | 13 | Cohort, case-control | RR | 1.36 (1.08, 1.71) | 0.009                 | 0.50 (0.06, 4.43) | 31 | 0.34 | 0.81, 2.29  | Weak           |

|                     |                                        |                                                                                                      |               |    |                      |    |                    |                       |                     |    |       |              |                   |
|---------------------|----------------------------------------|------------------------------------------------------------------------------------------------------|---------------|----|----------------------|----|--------------------|-----------------------|---------------------|----|-------|--------------|-------------------|
| <b>Wu, 2012</b>     | Fracture risk                          | SSRI exposure in general population of older adults                                                  | 66050/385515  | 12 | Cohort, case-control | RR | 1.72 (1.51, 1.95)  | 4.3x10 <sup>-18</sup> | 1.40 (1.34, 1.46)   | 91 | 0.06  | 1.12, 2.61   | Highly suggestive |
| <b>Eom, 2012</b>    | Fracture risk                          | SSRI exposure in general population of older adults                                                  | 201627/916152 | 12 | Cohort, case-control | RR | 1.69 (1.51, 1.90)  | 2.5x10 <sup>-19</sup> | 1.40 (1.34, 1.46)   | 90 | 0.05  | 1.14, 2.52   | Highly suggestive |
| <b>Loke, 2008</b>   | Upper gastrointestinal bleeding        | SSRIs (Patients with various disorders with a diagnosis of upper gastrointestinal bleeding)          | 2121/127048   | 4  | Cohort, case-control | OR | 2.35 (1.44, 3.85)  | 0.001                 | 3.60 (2.70, 4.70)   | 96 | 0.43  | 0.23, 24.66  | Weak              |
| <b>Loke, 2008</b>   | Upper gastrointestinal bleeding        | SSRIs + NSAIDs (Patients with various disorders with a diagnosis of upper gastrointestinal bleeding) | 619/127048    | 4  | Cohort, case-control | OR | 6.33 (3.39, 11.81) | 6.5x10 <sup>-9</sup>  | 12.20 (7.10, 19.50) | 91 | 0.16  | 0.36, 111.44 | Weak              |
| <b>Bar-Oz, 2007</b> | Cardiovascular malformations           | First trimester paroxetine exposure in pregnancy                                                     | 188/16501     | 6  | Cohort, case-control | OR | 1.79 (1.27, 2.53)  | 0.001                 | 2.16 (1.25, 3.72)   | 0  | 0.79  | 1.10, 2.92   | Weak              |
| <b>Bar-Oz, 2007</b> | Major malformations                    | First trimester paroxetine exposure in pregnancy                                                     | 646/16880     | 7  | Cohort, case-control | OR | 1.33 (1.03, 1.71)  | 0.03                  | 1.83 (0.59, 5.64)   | 23 | 0.98  | 0.78, 2.26   | Weak              |
| <b>Rahimi, 2006</b> | Major malformations                    | SSRI during pregnancy,                                                                               | 97/2529       | 9  | Cohort               | OR | 1.40 (0.86, 2.33)  | 0.17                  | 1.12 (0.08, 17.78)  | 0  | 0.87  | 0.76, 2.34   | No association    |
| <b>Rahimi, 2006</b> | Cardiovascular malformations           | SSRI during pregnancy,                                                                               | 21/1753       | 8  | Cohort               | OR | 1.18 (0.36, 3.89)  | 0.78                  | 3.40 (0.21, 251.89) | 0  | 0.43  | 0.25, 5.65   | No association    |
| <b>Rahimi, 2006</b> | Minor malformations                    | SSRI during pregnancy                                                                                | 88/500        | 2  | Cohort               | OR | 0.93 (0.13, 6.60)  | 0.94                  | 0.39 (0.22, 0.71)   | 0  | NA    | NA           | No association    |
| <b>Rahimi, 2006</b> | Spontaneous abortion                   | SSRI during pregnancy                                                                                | 225/2378      | 5  | Cohort               | OR | 1.70 (1.26, 2.30)  | 0.001                 | 2.06 (0.86, 5.17)   | 0  | 0.92  | 1.04, 2.78   | Weak              |
| <b>Healy, 2016</b>  | Autistic Spectrum or related disorders | SSRI during pregnancy                                                                                | 735/83750     | 5  | Case-control         | OR | 1.99 (1.67, 2.36)  | 5.0x10 <sup>-15</sup> | 2.3 (1.23, 2.74)    | 0  | 0.57  | 1.50, 2.63   | Weak              |
| <b>Oh, 2014</b>     | Risk of coronary heart disease         | SSRI                                                                                                 | 84709/925749  | 12 | Cohort, case-control | OR | 0.93 (0.65, 1.33)  | 0.672                 | 1.29 (0.89, 1.87)   | 98 | 0.400 | 0.24, 3.60   | No association    |

|                         |                              |                                                       |             |    |                      |    |                   |                       |                    |    |      |            |                |
|-------------------------|------------------------------|-------------------------------------------------------|-------------|----|----------------------|----|-------------------|-----------------------|--------------------|----|------|------------|----------------|
| <b>McDonagh, 2014</b>   | Preterm birth                | Antidepressant during pregnancy                       | NR / 304    | 2  | Cohort, case-control | OR | 1.84 (0.79, 4.27) | 0.155                 | 1.73 (0.63, 4.58)  | 0  | NA   | NA         | No association |
| <b>Huybrechts, 2014</b> | Preterm birth                | Antidepressant during early pregnancy (unadjusted)    | NR/ 308762  | 8  | Cohort, case-control | OR | 1.58 (1.31, 1.92) | 2.0x10 <sup>-5</sup>  | 1.38 (0.91, 2.10)  | 14 | 0.22 | 1.12, 2.23 | Weak           |
| <b>Huybrechts, 2014</b> | Preterm birth                | Antidepressant during pregnancy (any time unadjusted) | NR/ 1559757 | 4  | Cohort, case-control | OR | 1.44 (1.37, 1.51) | 6.0x10 <sup>-50</sup> | 1.44 (1.37, 1.51)  | 0  | 0.50 | 1.30, 1.61 | Suggestive     |
| <b>Huybrechts, 2014</b> | Preterm birth                | Antidepressant during pregnancy (any time adjusted)   | NR/ 294792  | 17 | Cohort, case-control | OR | 1.57 (1.41, 1.75) | 3.x10 <sup>-16</sup>  | 1.21 (0.67, 2.21)  | 19 | 0.00 | 1.26, 1.97 | Suggestive     |
| <b>Myles, 2013</b>      | Major malformations          | Fluoxetine during first trimester                     | NR/ NR      | 9  | Cohort, case-control | OR | 1.14 (1.01, 1.30) | 0.04                  | 0.79 (0.56, 1.12)  | 32 | 0.58 | 0.76, 1.78 | Weak           |
| <b>Myles, 2013</b>      | Major malformations          | Paroxetine during first trimester                     | NR/ NR      | 8  | Cohort, case-control | OR | 1.29 (1.11, 1.49) | 0.001                 | 1.00 (0.06, 16.85) | 0  | 0.28 | 1.07, 1.55 | Weak           |
| <b>Myles, 2013</b>      | Major malformations          | Sertraline during first trimester                     | NR/ NR      | 6  | Cohort, case-control | OR | 1.01 (0.88, 1.17) | 0.88                  | 0.62 (0.09, 4.00)  | 0  | 0.84 | 0.83, 1.24 | No association |
| <b>Myles, 2013</b>      | Major malformations          | SRI during first trimester                            | NR/ NR      | 6  | Cohort, case-control | OR | 1.06 (0.93, 1.21) | 0.37                  | 0.97 (0.81, 1.16)  | 0  | 0.59 | 0.88, 1.28 | No association |
| <b>Myles, 2013</b>      | Cardiovascular malformations | Fluoxetine during first trimester                     | NR/ NR      | 6  | Cohort, case-control | OR | 1.21 (0.99, 1.48) | 0.07                  | 0.77 (0.19, 3.11)  | 0  | 0.57 | 0.91, 1.61 | No association |

|                     |                                |                                   |                    |    |                      |    |                   |                      |                   |    |      |             |                |
|---------------------|--------------------------------|-----------------------------------|--------------------|----|----------------------|----|-------------------|----------------------|-------------------|----|------|-------------|----------------|
| <b>Myles, 2013</b>  | Cardiovascular malformations   | Paroxetine during first trimester | NR/<br>NR          | 8  | Cohort, case-control | OR | 1.44 (1.16, 1.79) | 0.001                | 0.88 (0.21, 0.80) | 6  | 0.88 | 1.03, 2.01  | Weak           |
| <b>Myles, 2013</b>  | Cardiovascular malformations   | Sertraline during first trimester | NR/<br>NR          | 8  | Cohort, case-control | OR | 0.97 (0.64, 1.48) | 0.90                 | 0.65 (0.34, 1.25) | 63 | 0.34 | 0.25, 3.87  | No association |
| <b>Myles, 2013</b>  | Minor malformations            | SSRI during first trimester       | NR/<br>NR          | 7  | Cohort, case-control | OR | 1.18 (0.84, 1.66) | 0.34                 | 0.62 (0.20, 1.92) | 32 | 0.33 | 0.54, 2.59  | No association |
| <b>Nikfar, 2012</b> | Cardiovascular malformations   | SSRI during pregnancy,            | 25128/<br>2309472  | 19 | Cohort               | OR | 1.17 (0.44, 3.09) | 0.75                 | 2.17 (0.92, 4.35) | 98 | 0.41 | 0.02, 70.99 | No association |
| <b>Nikfar, 2012</b> | Minor malformations            | SSRI during pregnancy,            | 2435/<br>698770    | 6  | Cohort               | OR | 1.35 (0.61, 3.00) | 0.45                 | 1.06 (0.70, 1.56) | 89 | 0.78 | 0.10, 18.31 | No association |
| <b>Biffi, 2017</b>  | Acute heart disease            | TCA                               | 71838/<br>741948   | 9  | Cohort, case-control | RR | 1.29 (1.09, 1.54) | 0.00                 | 1.41 (1.37, 1.45) | 73 | 0.47 | 0.81, 2.07  | Weak           |
| <b>Biffi, 2017</b>  | Haemorrhagic stroke            | SSRI                              | 1054/<br>159014    | 3  | Cohort, case-control | RR | 1.33 (0.86, 2.06) | 0.20                 | 1.00 (0.61, 1.63) | 38 | 0.43 | 0.02, 85.96 | No association |
| <b>Biffi, 2017</b>  | Ischaemic stroke               | SSRI                              | 4281/<br>159014    | 3  | Cohort, case-control | RR | 1.15 (0.98, 1.36) | 0.09                 | 1.10 (0.88, 1.37) | 0  | 0.37 | 0.39, 3.37  | No association |
| <b>Zhang, 2017</b>  | Atrial septal defect           | SSRI during pregnancy             | 4096/<br>2041138   | 6  | Cohort               | RR | 2.06 (1.40, 3.03) | 2.3x10 <sup>-4</sup> | 2.60 (1.84, 3.68) | 58 | 0.79 | 0.67, 6.28  | Suggestive     |
| <b>Zhang, 2017</b>  | Ventricular septal defect      | SSRI during pregnancy             | 12563/<br>2990642  | 7  | Cohort               | RR | 1.15 (0.97, 1.36) | 0.11                 | 1.20 (1.04, 1.39) | 30 | 0.11 | 0.78, 1.68  | No association |
| <b>Ross, 2013</b>   | Spontaneous abortion           | SSRI during pregnancy             | 367/ 5780          | 3  | Cohort               | RR | 1.46 (0.99, 2.16) | 0.06                 | 1.48 (0.83, 2.66) | 0  | 0.75 | 0.12, 18.58 | No association |
| <b>Gao, 2017</b>    | Major congenital malformations | Fluoxetine during pregnancy       | 132646/<br>4234692 | 12 | Cohort               | RR | 1.18 (1.08, 1.29) | 3.5x10 <sup>-4</sup> | 1.25 (1.10, 1.42) | 0  | 0.49 | 1.06, 1.30  | Suggestive     |

|                      |                                          |                                            |                 |    |                      |    |                   |                      |                   |    |      |            |                |
|----------------------|------------------------------------------|--------------------------------------------|-----------------|----|----------------------|----|-------------------|----------------------|-------------------|----|------|------------|----------------|
| <b>Gao, 2017</b>     | Cardiovascular malformations             | Fluoxetine during pregnancy                | 64921/6385820   | 12 | Cohort               | RR | 1.36 (1.17, 1.59) | 9.0x10 <sup>-5</sup> | 1.34 (1.10, 1.63) | 23 | 0.12 | 0.99, 1.87 | Suggestive     |
| <b>Morales, 2018</b> | Autism spectrum disorders                | Antidepressant during pregnancy            | 28105 / 2519942 | 11 | Cohort, case-control | RR | 1.53 (1.31, 1.78) | 4.0x10 <sup>-8</sup> | 2.17 (1.20, 3.93) | 33 | 0.82 | 1.07, 2.19 | Convincing     |
| <b>Morales, 2018</b> | Attention deficit hyperactivity disorder | Antidepressant during pregnancy            | NR/ NR          | 7  | Cohort, case-control | RR | 1.38 (1.13, 1.69) | 0.002                | 0.97 (0.54, 1.73) | 53 | 0.74 | 0.80, 2.23 | Weak           |
| <b>Morales, 2018</b> | Attention deficit hyperactivity disorder | Antidepressant during preconception period | NR/ NR          | 5  | Cohort, case-control | RR | 1.38 (1.14, 1.69) | 0.001                | 1.50 (1.01, 2.22) | 25 | 0.96 | 0.86, 2.24 | Weak           |
| <b>Morales, 2018</b> | Attention deficit hyperactivity disorder | Antidepressant during pregnancy            | NR/ NR          | 3  | Sibling study design | RR | 0.88 (0.70, 1.12) | 0.296                | 0.70 (0.37, 1.31) | 0  | 0.08 | 0.19, 4.00 | No association |
| <b>Gao, 2018</b>     | Major congenital malformations           | SSRI during pregnancy                      | NR/ NR          | 9  | Cohort               | RR | 1.11 (1.03, 1.19) | 0.004                | 1.13 (1.06, 1.20) | 38 | 0.83 | 0.94, 1.31 | Weak           |
| <b>Gao, 2018</b>     | Cardiovascular malformations             | SSRI during pregnancy                      | NR/ NR          | 18 | Cohort               | RR | 1.24 (1.11, 1.37) | 6.2x10 <sup>-5</sup> | 1.03 (0.86, 1.24) | 59 | 0.45 | 0.89, 1.71 | Weak           |

TCAs– tricyclic antidepressants, SSRI – selective serotonin reuptake inhibitors, I<sup>2</sup> –heterogeneity, CI – confidence interval, OR – odds ratio, RR – relative risk, HR– hazard ratio, NA– not applicable.

**eTable 7.** List of Covariates Used for the Sensitivity Analysis Limited to Studies Adjusted for Covariates

| <b>Meta-analysis author, year, outcome</b>            | <b>Primary study author year</b> | <b>Factors considered during adjusted analysis</b>                                                                                                                                                                                                                                                                                                                 |
|-------------------------------------------------------|----------------------------------|--------------------------------------------------------------------------------------------------------------------------------------------------------------------------------------------------------------------------------------------------------------------------------------------------------------------------------------------------------------------|
| Man, 2018<br>Attention deficit hyperactivity disorder | Boukhris, 2017                   | Gender, birth year, maternal age, maternal education level, recipient of social assistance, area of residence, maternal psychiatric disorders in the year prior to or during pregnancy (depression/anxiety, other psychiatric disorders), maternal comorbidities (gestational diabetes, gestational hypertension), maternal history of ADHD                        |
|                                                       | Laugesen, 2013                   | Gender of the child, calendar time at birth, birth order, maternal age at birth, maternal smoking status, maternal psychiatric diagnoses, paternal psychiatric diagnoses, maternal diseases during pregnancy (infections, epilepsy) and maternal anxiolytics/ hypnotics/sedatives use during pregnancy                                                             |
|                                                       | Malm, 2016                       | Sex; socioeconomic status; smoking during pregnancy; neonatal care unit; maternal history of other psychiatric diagnosis; maternal history of substance abuse; paternal history of psychiatric diagnosis; parental death                                                                                                                                           |
|                                                       | Man, 2017                        | Maternal age at delivery, infant's sex, birth year, birth hospital, parity, maternal underlying medical conditions before delivery (pre-existing diabetes, epilepsy, gestational diabetes, psychiatric conditions, hypertension), use of other psychotropic drugs (antipsychotics, British National Formulary chapter 4.2.1, 4.2.2), and socioeconomic status.     |
|                                                       | Sujan, 2017                      | Parity; year of birth; country of birth; age at childbearing; highest level of completed education; history of any criminal conviction; history of severe psychiatric illnesses (inpatient diagnosis of ICD-8, ICD-9, or ICD-10 schizophrenia, bipolar disorder, or other non-drug-induced psychoses); and history of any suicide attempts.                        |
|                                                       | Clements, 2015                   | Gender, race, birth year, insurance type, median income tertile, past history of maternal depression                                                                                                                                                                                                                                                               |
|                                                       | Figueroa, 2010                   | Maternal age group, gender of the child, urban or rural metropolitan statistical area, year of birth, age at last claim and at end of eligibility, maternal and paternal mental health diagnoses, the presence or absence of maternal mental health-related visits by period of time, the use of other psychotropics during pregnancy, and perinatal complications |
| Fu, 2018<br>Cataract risk                             | Becker, 2017                     | Calendar time (same index date), age, sex, general practice, and number of years of active history in the CPRD before the index date, BMI, smoking, diabetes, hypertension, and systemic steroids                                                                                                                                                                  |
|                                                       | Chou, 2017                       | Age, sex, index date, patient's demographics, mental illness characteristics, propensity score derived from comorbid conditions, and concomitant medications                                                                                                                                                                                                       |
|                                                       | Klein, 2001                      | Age and gender                                                                                                                                                                                                                                                                                                                                                     |
| Morales, 2018<br>Autism pre-pregnancy exposure        | Boukhris, 2016                   | Gender, year of birth, maternal age, marital status, living alone, education, social assistance or care, maternal psychiatric history, paternal psychiatric history, maternal physical history, paternal physical history                                                                                                                                          |
|                                                       | Brown, 2017                      | Gender, gestational age at delivery, maternal age, maternal psychiatric history, maternal physical history, pre-pregnancy related/delivery, severity of depression, parity, drugs other than antidepressants                                                                                                                                                       |
|                                                       | Castro, 2016                     | Gender, year of birth, gestational age at delivery, maternal age, education, maternal psychiatric history, maternal physical history, severity of depression, parity, insurance type ethnicity or country of origin, maternal income                                                                                                                               |



|                                              |                       |                                                                                                                                                                                                                                                                       |
|----------------------------------------------|-----------------------|-----------------------------------------------------------------------------------------------------------------------------------------------------------------------------------------------------------------------------------------------------------------------|
|                                              | Clements, 2015        | Gender, year of birth, birth weight, gestational age at delivery, maternal age, education, maternal psychiatric history, maternal physical history, pre-pregnancy related/delivery, severity of depression, parity, insurance type ethnicity or country of origin     |
|                                              | Croen, 2011           | Gender, year of birth, birth weight, gestational age at delivery, maternal age, education, maternal psychiatric history, parity, ethnicity or country of origin                                                                                                       |
|                                              | Hviid, 2013           | Gender, year of birth, gestational age at delivery, maternal age, education, maternal psychiatric history, smoking status, parity, ethnicity or country of origin residence, employment status                                                                        |
|                                              | Sujan, 2017           | Year of birth, maternal age, education, maternal psychiatric history, parity, ethnicity or country of origin,                                                                                                                                                         |
| Laporte, 2017<br>Severe bleeding at any site | de Abajo 1999         | UGIB history, smoking status, current use of NSAID, AC, corticosteroids, aspirin                                                                                                                                                                                      |
|                                              | de Abajo 2000         | Hypertension, migraine, asthma or COPD, smoking status, BMI, current use of NSAIDs                                                                                                                                                                                    |
|                                              | Bak 2002              | Age, sex, hypertension, diabetes, smoking status, AC, antiarrhythmics, antianginal drugs                                                                                                                                                                              |
|                                              | Meijier 2004          | Bleeding history, NSAIDs, AC, glucocorticoids, estrogens, progesterones, histamine blockers, PPIs, antidiabetic agents                                                                                                                                                |
|                                              | Kurdyak 2005          | UGIB history, current use of aspirin, NSAID, glucocorticoid, PPIs, H2 reuptake inhibitors                                                                                                                                                                             |
|                                              | Tata 2005             | NR                                                                                                                                                                                                                                                                    |
|                                              | Helin-Salmivaara 2007 | Histamine-2 receptor antagonist, plain misoprostol, PPIs, warfarin, clopidogrel or inhaled glucocorticoid and tramadol, hospitalisation for arthroplasty, hypertension, angina pectoris, cardiac insufficiency, diabetes mellitus, rheumatoid arthritis, asthma       |
|                                              | Kharof 2007           | NR                                                                                                                                                                                                                                                                    |
|                                              | Vonbach 2007          | Glucocorticoids, NSAIDs, AC, SSRIs, TAI, PPIs, hypertensive disease                                                                                                                                                                                                   |
|                                              | Ziegelstein 2007      | NR                                                                                                                                                                                                                                                                    |
|                                              | de Abajo 2008         | Age, sex, calendar year, smoking status, alcohol intake, history of GI disorder, NSAIDs, systemic corticosteroids, warfarin, low-dose aspirin, antiplatelet drug                                                                                                      |
|                                              | Lewis 2008            | Age, sex, race, alcohol consumption, history of ulcer disease, hypertension, PPI use, H2RA use, ASA dose and NSAID dose                                                                                                                                               |
|                                              | Opatrny 2008          | Age, sex, BMI, blood pressure, smoking status, comorbid conditions, warfarin, clopidogrel, antidepressant                                                                                                                                                             |
|                                              | Salkeld 2008          | Previous PPH, multiple pregnancy, prolonged labor, abnormalities of the forces of labor, obstructed labor, perineal laceration or other gynecologic laceration, other obstetric trauma, placenta previa, placental abruption, and hypertensive disorders of pregnancy |
|                                              | Schalekamp 2008       | NR                                                                                                                                                                                                                                                                    |
|                                              | Vidal 2008            | History of peptic ulcer, dyspepsia, UGIB, diabetes mellitus, smoking habit, alcohol consumption and use of antacids, PPIs, sucralfate, nitrates, systemic NSAIDs, topical NSAIDs, analgesics, antiplatelet drugs, dihydropyridine calcium antagonists and statin      |

|                                      |                |                                                                                                                                                                                                                                                                                                                                                               |
|--------------------------------------|----------------|---------------------------------------------------------------------------------------------------------------------------------------------------------------------------------------------------------------------------------------------------------------------------------------------------------------------------------------------------------------|
|                                      | Barbui 2009    | Age, gender, use of antianemic preparations, use of drugs for peptic ulcer                                                                                                                                                                                                                                                                                    |
|                                      | Chen 2009      | Use of aspirin, AC, risperidone, anxiety, alcohol abuse, substance abuse, hypertension, diabetes, hypercholesterolemia, cardiac diseases                                                                                                                                                                                                                      |
|                                      | Dall 2009      | Age, gender, calendar year, low dose aspirin, PPIs, NSAIDs, alcohol abuse, cerebral ischemia, stroke, warfarin, clopidogrel, dipyridamol, steroids, helicobacter eradication, peptic ulcer, UGIB, cirrhosis                                                                                                                                                   |
|                                      | Targownik 2009 | Cardiovascular disease, respiratory disease, hepatic disease, renal disease, active malignancy, alcohol abuse, depression, schizophrenia, acute hospitalisation, upper endoscopy, H2-receptor antagonists, warfarin, clopidogrel, systemic corticosteroids, tricyclic antidepressants                                                                         |
|                                      | Carvajal 2011  | Alcohol and caffeine consumption, past history of GI disorders, family history of GI bleeding, osteoarthritis, number of medicines taken and use of NSAIDs, salicylates, PPIs, H2 antihistamines, antacids, antiplatelet agents and AC                                                                                                                        |
|                                      | Douglas 2011   | Smoking, alcohol, BMI, prior history of transient ischemic attack or other stroke, hypertension, diabetes, NSAID use, aspirin use, clopidogrel or dipyridamole use, year of first prescription, observation time                                                                                                                                              |
|                                      | Verdel 2011    | NSAIDs, oral glucocorticoids, PPI, platelet aggregation inhibitors                                                                                                                                                                                                                                                                                            |
|                                      | de Abajo 2013  | Age, gender, calendar year, smoking, peptic ulcer history, number of GP visits in the year prior to index date and concomitant use of other medications                                                                                                                                                                                                       |
|                                      | Andreasen 2006 | Age, sex, preoperative use of platelet inhibitors, NSAIDs, oral anticoagulant, place of surgery, use of extracorporeal circulation, concomitant valve surgery, Charlson comorbidity index                                                                                                                                                                     |
|                                      | Hauta-Aho 2009 | Age, sex, study ward, PPI and oral glucocorticoid medications                                                                                                                                                                                                                                                                                                 |
|                                      | Kim 2009       | NR                                                                                                                                                                                                                                                                                                                                                            |
|                                      | Gärtner 2010   | Age                                                                                                                                                                                                                                                                                                                                                           |
|                                      | Tully 2012     | Propensity score (including age, sex, urgency of surgery, previous myocardial infarction, respiratory disease, left ventricular ejection fraction, diabetes mellitus, renal disease, peripheral vascular disease, cerebrovascular disease, cardiogenic shock, heart failure, hypertension, smoking and OPCAB procedure, statin, antiplatelet, anticoagulants) |
|                                      | Basile 2013    | Age, body weight, surgery type                                                                                                                                                                                                                                                                                                                                |
|                                      | Mortensen 2013 | Propensity-matched analysis (among 5837 users and 30338 non-users) and use of other drugs during follow-up (non-SSRI, other antidepressant, blood pressure lowering drugs, platelet inhibitors, VKA, statins)                                                                                                                                                 |
|                                      | Seitz 2013     | Age, sex, Charlson score, number of medications, residence (long-term care or community)                                                                                                                                                                                                                                                                      |
|                                      | Quinn 2013     | Time varying ATRIA bleeding risk score, INR value                                                                                                                                                                                                                                                                                                             |
| Jiang, 2016<br>Postpartum hemorrhage | Salkeld 2008   | Previous postpartum hemorrhage, multiple pregnancy, prolonged labor, abnormalities of the forces of labor, obstructed labor, perineal laceration or other gynecologic laceration, other obstetric trauma, placenta previa, placental abruption, and hypertensive disorders of pregnancy                                                                       |
|                                      | Palmsten 2013  | Delivery year, age, race, multiple pregnancy, diabetes, coagulopathy, number of outpatient mood/anxiety disorder diagnoses, number of inpatient mood/anxiety disorder diagnoses, psychotic disorder, other mental health disorder, pain indication, sleep disorder, anticonvulsant dispensing, benzodiazepine dispensing, aspirin dispensing, heparin         |

|                                                   |                       |                                                                                                                                                                                                                                                                                                                                                                                                                                        |
|---------------------------------------------------|-----------------------|----------------------------------------------------------------------------------------------------------------------------------------------------------------------------------------------------------------------------------------------------------------------------------------------------------------------------------------------------------------------------------------------------------------------------------------|
|                                                   |                       | dispensing, low molecular weight heparin dispensing, warfarin dispensing, and number of outpatient visits and days in hospital during baseline.                                                                                                                                                                                                                                                                                        |
|                                                   | Lindqvist 2014        | Maternal age, parity, BMI, educational level, smoking, coagulation defects, history of previous abortion/miscarriage, placental abruption, placenta previa, and maternal depressive symptoms.                                                                                                                                                                                                                                          |
|                                                   | Lupattelli 2014       | Maternal age, marital status, BMI, smoking, placenta previa, bleeding episode in first trimester, and depressive symptoms.                                                                                                                                                                                                                                                                                                             |
|                                                   | Grzeskowiak 2015      | Delivery year, age, socio-economic status, race, multiple pregnancy, parity, smoking status, alcohol or substance abuse during pregnancy, coagulation defects, asthma, diabetes, hypertension, previous caesarean section, and use of other psychotropic medications                                                                                                                                                                   |
|                                                   | Joseph 2015           | Social assistance, residence urban, previous caesarean, multi-foetal pregnancy, placenta previa/ abruption, polyhydramnios, prolonged labour, preeclampsia/eclampsia, epidural analgesia, labour induction, uterine rupture, cervical laceration, caesarean delivery, perineal laceration, vaginal laceration, chorioamnionitis.                                                                                                       |
|                                                   | Hanley 2016           | Year of birth, maternal age, parity, preterm birth, multifetal pregnancy, diabetes (both gestational and pre-existing), coagulopathy, smoking during pregnancy, blood thinner use in the month before delivery, anxiolytic use in the month before delivery, antipsychotic use in the month before delivery, a diagnosis of mood disorder, any psychiatric visits, or any psychiatric hospitalization in the 5 months before delivery. |
|                                                   | Kim 2016              | Age, race, education, parity, comorbid anxiety to the SRI exposure variable, and depressive symptoms.                                                                                                                                                                                                                                                                                                                                  |
| Jiang, 2015<br>Upper gastrointestinal<br>bleeding | de Abajo 1999         | UGIB history, smoking status, current use of NSAID, AC, corticosteroids, aspirin                                                                                                                                                                                                                                                                                                                                                       |
|                                                   | Helin-Salmivaara 2007 | Histamine-2 receptor antagonist, plain misoprostol, PPIs, warfarin, clopidogrel or inhaled glucocorticoid and tramadol, hospitalisation for arthroplasty, hypertension, angina pectoris, cardiac insufficiency, diabetes mellitus, rheumatoid arthritis, asthma                                                                                                                                                                        |
|                                                   | de Abajo 2008         | Age, sex, calendar year, smoking status, alcohol intake, history of GI disorder, NSAIDs, systemic corticosteroids, warfarin, low-dose aspirin, antiplatelet drug                                                                                                                                                                                                                                                                       |
|                                                   | Schalekamp 2008       | NR                                                                                                                                                                                                                                                                                                                                                                                                                                     |
|                                                   | Opatrny 2008          | Age, sex, BMI, blood pressure, smoking status, comorbid conditions, warfarin, clopidogrel, antidepressant                                                                                                                                                                                                                                                                                                                              |
|                                                   | Lewis 2008            | Age, sex, race, alcohol consumption, history of ulcer disease, hypertension, PPI use, H2RA use, ASA dose and NSAID dose                                                                                                                                                                                                                                                                                                                |
|                                                   | Vidal 2008            | History of peptic ulcer, dyspepsia, UGIB, diabetes mellitus, smoking habit, alcohol consumption and use of antacids, PPIs, sucralfate, nitrates, systemic NSAIDs, topical NSAIDs, analgesics, antiplatelet drugs, dihydropyridine calcium antagonists and statin                                                                                                                                                                       |
|                                                   | Barbui 2009           | Age, gender, use of antianemic preparations, use of drugs for peptic ulcer                                                                                                                                                                                                                                                                                                                                                             |
|                                                   | Targownik 2009        | Cardiovascular disease, respiratory disease, hepatic disease, renal disease, active malignancy, alcohol abuse, depression, schizophrenia, acute hospitalisation, upper endoscopy, H2-receptor antagonists, warfarin, clopidogrel, systemic corticosteroids, tricyclic antidepressants                                                                                                                                                  |

|                                 |                  |                                                                                                                                                                                                                                                                                                                      |
|---------------------------------|------------------|----------------------------------------------------------------------------------------------------------------------------------------------------------------------------------------------------------------------------------------------------------------------------------------------------------------------|
|                                 | Dall 2009        | Age, gender, calendar year, low dose aspirin, PPIs, NSAIDs, alcohol abuse, cerebral ischemia, stroke, warfarin, clopidogrel, dipyridamol, steroids, helicobacter eradication, peptic ulcer, UGIB, cirrhosis                                                                                                          |
|                                 | Carvajal 2011    | Alcohol and caffeine consumption, past history of GI disorders, family history of GI bleeding, osteoarthritis, number of medicine taken and use of NSAIDs, salicylates, PPIs, H2 antihistamines, antacids, antiplatelet agents and AC                                                                                |
|                                 | Verdel 2011      | NSAIDs, oral glucocorticoids, PPI, platelet aggregation inhibitors                                                                                                                                                                                                                                                   |
|                                 | de Abajo 2013    | Age, gender, calendar year, smoking, peptic ulcer history, number of GP visits in the year prior to index date and concomitant use of others medications                                                                                                                                                             |
|                                 | Wang 2014        | Concurrent drug use                                                                                                                                                                                                                                                                                                  |
|                                 | Huang 2011       | Age, concurrent drug use                                                                                                                                                                                                                                                                                             |
| Huang, 2014<br>Preterm birth    | Nordeng 2012     | Depression                                                                                                                                                                                                                                                                                                           |
|                                 | Yonkers 2012     | Depression                                                                                                                                                                                                                                                                                                           |
|                                 | Latendresse 2011 | Depression                                                                                                                                                                                                                                                                                                           |
|                                 | Lewis 2010       | Depression                                                                                                                                                                                                                                                                                                           |
|                                 | Lennestal 2007   | NR                                                                                                                                                                                                                                                                                                                   |
|                                 | Suri 2007        | Depression                                                                                                                                                                                                                                                                                                           |
| Wu, 2013<br>Fracture risk, TCAs | Ensrud 2003      | Age, health status, use of $\geq 1$ medication, walking for exercise, functional impairment, fall in previous year, cognitive function, weight change, gait speed, inability to rise from chair, femoral neck BMD                                                                                                    |
|                                 | Lewis 2007       | Age, BMD                                                                                                                                                                                                                                                                                                             |
|                                 | Ziere 2008       | Age, sex, depression during follow- up period, disability category, lower- limb disability                                                                                                                                                                                                                           |
|                                 | Diem 2011        | Age, health status, IADL, ability to rise from chair, m- MMSE, smoking, alcohol use, estrogen use, bisphosphonate use, benzodiazepine use, thiazide use, PPI use, oral steroid use, weight, GDS score, walks for exercise, history of prior fracture, total- hip BMD and history of falls in previous year           |
|                                 | Coupland 2011    | Age, sex, depression, deprivation, smoking status, comorbidities (ischemic heart disease, DM, HTN, stroke, cancer, dementia, epilepsy or seizures, PD, hypothyroidism, OCD) and use of other drugs (eg, statins, NSAIDs, antipsychotics, lithium, aspirin, anti- HTN drugs, anticonvulsants, hypnotics, anxiolytics) |
|                                 | Ray 1987         | Sex, race, age, index year, and home status, diagnosis of dementia                                                                                                                                                                                                                                                   |
|                                 | Ray 1991         | Age, sex, calendar year, nursing home residence on index date, and for hospitalization and use of specific medications (narcotic analgesics, anti- HTN, and other cardiovascular drugs) in year preceding index date                                                                                                 |
|                                 | Liu 1998         | Age, sex, comorbidity (eg, depression, dementia, osteoporosis), previous drug exposure (eg, sedative, tranquilizer, cardiac drug, anti- PD agent, thyroid- replacement drug, anticonvulsant, insulin, glucocorticoid, estrogen, etidronate)                                                                          |
|                                 | Hubbard 2003     | Age, sex, general practice, duration of available GPRD data, history of falls, and history of prescriptions for hypnotics and antipsychotics                                                                                                                                                                         |

|                                        |                                |                                                                                                                                                                                                                                                                                                                                                                                                                                                                     |
|----------------------------------------|--------------------------------|---------------------------------------------------------------------------------------------------------------------------------------------------------------------------------------------------------------------------------------------------------------------------------------------------------------------------------------------------------------------------------------------------------------------------------------------------------------------|
|                                        | Vestergaard 2006               | Age, sex, psychiatric comorbidity (eg, manic depression, schizophrenia, alcoholism, eating disorder); medication use (eg, anxiolytic, sedative, neuroleptic, corticosteroid, antiepileptic, cardiovascular agent, lithium); hospital stay; prior fracture; income; working, educational, and residential status; Charlson index                                                                                                                                     |
|                                        | Van den Brand                  | Age, sex, geographical region, other antidepressant, use of benzodiazepine, antipsychotic, lithium, anti- PD agent, anticonvulsant, oral- inhaled corticosteroid, bronchodilator, HRT, antiarrhythmic, thiazide diuretic, $\beta$ - blocker, opioids, anticonvulsants, DM drug, $\geq 2$ dispensings of an NSAID, DMARDs, metoclopramide hydrochloride; history of malignant neoplasm, mental disorder, cerebrovascular disease, obstructive airway disease, or IBD |
|                                        | Verdel 2010                    | Age; sex; geographical area; calendar time; cancer; cardiovascular disease; cerebrovascular disease; IBD; mental disorder; obstructive airway disease; use of antidiabetic, antiepileptic, anti- PD drug, antipsychotic, benzodiazepine, $\beta$ - blocker, DMARD, HRT, NSAID, oral glucocorticoid, opioid                                                                                                                                                          |
| Ross, 2013<br>Apgar score at 5 minutes | Simon et al., 2002             | maternal age, year of delivery, lifetime number of antidepressant prescriptions filled or refilled, lifetime history of outpatient psychiatric treatment, lifetime history of inpatient psychiatric treatment, tobacco use, other substance use, race, number of prior births                                                                                                                                                                                       |
|                                        | Laine et al., 2003             | maternal age, gravidity, parity, gestational age, time and mode of delivery                                                                                                                                                                                                                                                                                                                                                                                         |
|                                        | Zeskind & Stephens, 2004       | maternal age ( $\pm 2$ yrs), maternal cigarette use, low socioeconomic status,                                                                                                                                                                                                                                                                                                                                                                                      |
|                                        | Pearson et al., 2007           | age ( $\pm 5$ years), parity, tobacco use, marital status                                                                                                                                                                                                                                                                                                                                                                                                           |
|                                        | Calderon-Margalit et al., 2009 | maternal age, race, marital status, education, smoking during pregnancy, preeclampsia, parity, singleton pregnancy                                                                                                                                                                                                                                                                                                                                                  |
|                                        | Lund et al., 2009              | maternal age, BMI, smoking, a previous pregnancy with prematurity, gestational age, previous birth of a low-birth- weight infant, parity, and coffee and alcohol intake                                                                                                                                                                                                                                                                                             |
|                                        | Wisner et al., 2009            | maternal age, race                                                                                                                                                                                                                                                                                                                                                                                                                                                  |
|                                        | Reis et al., 2010              | year of birth, maternal age, parity, smoking, body mass index (BMI)                                                                                                                                                                                                                                                                                                                                                                                                 |
| Oderda, 2012<br>Hip fracture           | van den Brand (2009)           | Age sex, medications, comorbidities                                                                                                                                                                                                                                                                                                                                                                                                                                 |
|                                        | Chang (2008)                   | Age, sex                                                                                                                                                                                                                                                                                                                                                                                                                                                            |
|                                        | Ensrud (2003)                  | Age, debilitation, gait speed, femoral neck, bone density                                                                                                                                                                                                                                                                                                                                                                                                           |
|                                        | Hubbard (2003)                 | History of falls, medications                                                                                                                                                                                                                                                                                                                                                                                                                                       |
|                                        | Wang (2001)                    | Age, sex, race, medications, debilitation                                                                                                                                                                                                                                                                                                                                                                                                                           |
|                                        | Jacqmin-Gadda (1998)           | Age, sex, residence                                                                                                                                                                                                                                                                                                                                                                                                                                                 |
|                                        | Guo (1998)                     | Comorbidities, medications                                                                                                                                                                                                                                                                                                                                                                                                                                          |
|                                        | Liu (1998)                     | Comorbidities, medications                                                                                                                                                                                                                                                                                                                                                                                                                                          |
|                                        | Johansson (1996)               | Sex, comorbidities                                                                                                                                                                                                                                                                                                                                                                                                                                                  |
|                                        | Lichtenstein (1994)            | Age, sex, comorbidities                                                                                                                                                                                                                                                                                                                                                                                                                                             |

|                                                |                     |                                                                                                                                                                                                                                                                                                                                                                                                                                             |
|------------------------------------------------|---------------------|---------------------------------------------------------------------------------------------------------------------------------------------------------------------------------------------------------------------------------------------------------------------------------------------------------------------------------------------------------------------------------------------------------------------------------------------|
|                                                | Cumming (1993)      | Age, sex, residence                                                                                                                                                                                                                                                                                                                                                                                                                         |
|                                                | Jensen (1991)       | Age, sex, debilitation, medications                                                                                                                                                                                                                                                                                                                                                                                                         |
|                                                | Ray (1991)          | Age, sex, debilitation, medications                                                                                                                                                                                                                                                                                                                                                                                                         |
|                                                | Ray (1987)          | Age, sex, race, residence                                                                                                                                                                                                                                                                                                                                                                                                                   |
| Barbui, 2009<br>Suicide attempt and completion | Olfson 2006         | White population, median income, number of per capita physicians pediatricians, child psychiatrists and psychiatrists                                                                                                                                                                                                                                                                                                                       |
|                                                | Olfson 2006         | Age, sex, race, substance use disorder, recent suicide attempt, treatment with antipsychotic anxiolytic, hypnotic, stimulant and mood stabilizing drugs                                                                                                                                                                                                                                                                                     |
|                                                | Sondergard 2007     | Age, sex, and socioeconomic classification                                                                                                                                                                                                                                                                                                                                                                                                  |
|                                                | Tiihonen 2006       | Age, sex, geographical location, number of suicide attempts before the index hospitalization, number of suicide attempts during follow/up, use of multiple antidepressants and number of purchased antidepressants during the previous year                                                                                                                                                                                                 |
|                                                | Gibbons 2007        | No                                                                                                                                                                                                                                                                                                                                                                                                                                          |
|                                                | Valuck 2004         | Propensity score and calendar year                                                                                                                                                                                                                                                                                                                                                                                                          |
| Khanassov, 2018<br>Fracture risk; SSRIs        | van den Brand, 2009 | Age, sex, geographical region, other than SSRIs antidepressants, benzodiazepines, antipsychotics, lithium, anti-Parkinson drugs, anticonvulsants, corticosteroids, hormone- replacement therapy, disease- modifying antirheumatic drugs, nonsteroidal antiinflammatory drugs, antiarrhythmic, thiazide diuretics, beta- blockers, opiates, metoclopramide, antidiabetic drugs; history of hospitalization                                   |
|                                                | Verdel, 2010        | Age, sex, geographical region, calendar time, other than SSRIs antidepressants, benzodiazepines, antipsychotics, lithium, anti- Parkinson drugs, anticonvulsants, corticosteroids, hormone- replacement therapy, disease- modifying antirheumatic drugs, nonsteroidal antiinflammatory drugs, antiarrhythmic, thiazide diuretics, beta- blockers, opiates, metoclopramide, antidiabetic drugs, thyroid hormones; history of hospitalization |
|                                                | Vestergaard, 2006   | Age, sex, psychiatric comorbidity (eg, schizophrenia, alcoholism), medication use such as anxiolytic, sedative, neuroleptic, corticosteroid, antiepileptic, lithium, hospitalization, prior fracture, income, working status, education, residence, Charlson index                                                                                                                                                                          |
|                                                | Bolton, 2008        | Age, sex, ethnicity, income, residence, comorbidity index of the John Hopkins Ambulatory Care Group system (diabetes, ischemic heart disease, myocardial infarction, hypertension, epilepsy, rheumatoid arthritis, organ transplantation, COPD, home care use, depression, substance abuse, dementia, schizophrenia), medication use such as anticonvulsants, diuretics, anticoagulant, thyroid hormone                                     |
|                                                | Liu, 1998           | Age, sex, comorbidities (depression, dementia and other), medications such as sedatives, tranquilizers, cardiac agents, anti- Parkinson drugs, thyroid hormones, anticonvulsants, diabetic agents, corticosteroids, estrogens, etidronate; different exposure categories and doses of antidepressant                                                                                                                                        |
|                                                | Abrahamsen, 2009    | Age, previous fracture, modified Charlson comorbidity index, groups of medications                                                                                                                                                                                                                                                                                                                                                          |
|                                                | Wang, 2016          | Age, sex, hypertension, diabetes, osteoporosis, history of falls, cardiac diseases, chronic obstructive pulmonary disease, urinary incontinence, Parkinson disease, chronic mental disorders, dementia, depression, liver disease,                                                                                                                                                                                                          |

|  |                   |                                                                                                                                                                                                                                                                                                                                                                                                                                                            |
|--|-------------------|------------------------------------------------------------------------------------------------------------------------------------------------------------------------------------------------------------------------------------------------------------------------------------------------------------------------------------------------------------------------------------------------------------------------------------------------------------|
|  |                   | peripheral vascular disease, cerebrovascular disease, arthritis, chronic kidney diseases, glaucoma; use of medications (opiates, nonopioid analgesics, antipsychotics, anxiolytics, sedatives, corticosteroids, hormone replacement therapy, antiepileptics, tricyclics)                                                                                                                                                                                   |
|  | Rabenda, 2012     | Lumbar spine, femoral neck and total hip BMD, depression, history of vertebral/ nonvertebral fracture, benzodiazepine use, antihypertensive and antiarrhythmic drugs                                                                                                                                                                                                                                                                                       |
|  | Spangler, 2008    | Age, BMD, height, weight, ethnicity, physical function, hormone replacement therapy, smoking, years since menopause, number of falls, previous fracture, use of analgesics, narcotics, cardiovascular diseases                                                                                                                                                                                                                                             |
|  | Richards, 2007    | Age, sex, education, study center, BMI, comorbidities based on modified Charlson index, self- reported general health, prior smoking and alcohol intake, history of falls and fractures, calcium and vitamin D intake, dementia based on MMSE, depression, medication use such as bisphosphonates, antihypertensive, diuretics, corticosteroids, estrogens, benzodiazepines, anticonvulsants, antipsychotics, tricyclics, BMD                              |
|  | Lewis, 2007       | Age, BMD                                                                                                                                                                                                                                                                                                                                                                                                                                                   |
|  | Schneeweiss, 2004 | BMI, current smoking status, activities of daily living, cognitive impairment                                                                                                                                                                                                                                                                                                                                                                              |
|  | Carriere, 2016    | Age, center, sex, smoking, benzodiazepines, other CNS drugs, osteo- articular pain, time since first depressive episode, antiosteoporosis drugs, corticosteroids                                                                                                                                                                                                                                                                                           |
|  | Ensrud, 2003      | Age, health status, one or more medical conditions, walking for exercise, functional impairment, fall in previous year, cognitive function, weight change, gait speed, inability to rise from chair, femoral neck bone density.                                                                                                                                                                                                                            |
|  | Ziere, 2008       | Age, sex, disability category, lower limb disability, depression                                                                                                                                                                                                                                                                                                                                                                                           |
|  | Diem, 2011        | Age, health status, instrumental daily activities, ability to rise from chair, MMSE, smoking, alcohol use, hormone replacement therapy, bisphosphonate use, benzodiazepine use, thiazide use, proton pump inhibitor use, corticosteroid use, weight, depression, walks for exercise, prior fracture, BMD                                                                                                                                                   |
|  | Coupland, 2011    | Age, sex, year of depression diagnosis, diagnosis of depression before age 65, severity of index depression, deprivation level, smoking status, comorbidities (heart conditions, diabetes, dementia, cancer, epilepsy, Parkinson's disease, hypothyroidism, obsessive- compulsive disorder, stroke), use of statins, nonsteroidal antiinflammatory drugs, antipsychotics, lithium, aspirin, antihypertensive, anticonvulsants, hypnotics), previous falls. |
|  | Bakken, 2013      | Sex, birth year, time period                                                                                                                                                                                                                                                                                                                                                                                                                               |
|  | Cheng, 2016       | Age, sex, urbanization, osteoporosis, Charlson comorbidity index                                                                                                                                                                                                                                                                                                                                                                                           |
|  | Souverein, 2016   | Age, sex, previous fracture, corticosteroids, rheumatoid arthritis, smoking, alcohol use, BMI, osteoporosis, history of bone diseases, previous use of bisphosphonates or other bone protecting drugs: raloxifene, strontium ranelate, parathyroid hormone, calcium, vitamin D, calcitonin, calcitriol                                                                                                                                                     |
|  | Sheu 2015         | Age, sex, previous fracture, corticosteroids, rheumatoid arthritis, smoking, alcohol use, BMI, osteoporosis, history of bone diseases, previous use of bisphosphonates or other bone protecting drugs: raloxifene, strontium ranelate, parathyroid hormone, calcium, vitamin D, calcitonin, calcitriol                                                                                                                                                     |
|  | Adachi,2014       | Age, BMI, parental history of hip fracture, rheumatoid arthritis, prior fracture, osteoarthritis, celiac disease, Crohn's disease, Parkinson's disease, falls in the past year, smoking, alcohol intake, anxiety, depression, general health, physical function and vitality                                                                                                                                                                               |

## **eMethods.** Supplementary Methods

### Selection between overlapping meta-analysis

At full-text assessment, we extracted relevant information to define antidepressants exposure, inclusion criteria for the population of interest and outcome definition of each meta-analysis. When two or more meta-analyses focused on the same combination of exposure, population, and outcome we selected only the meta-analysis that included the largest data set and sufficient individual data for statistical analysis.<sup>208</sup> We also examined whether the main reported conclusions were concordant regarding the direction and the significance level of the association.<sup>209</sup> If the results were concordant, then again, we selected the one that included the largest data set and sufficient individual data for statistical analysis.<sup>208</sup> If two or more meta-analyses focused on the same combination of exposure, population, and outcome, but included a different set of primary studies (for example, different set of cohort studies but the same set of case-control studies and vice versa, or only cohort studies) then we kept both or all. If two or more meta-analyses focused on the same combination of exposure, population, and outcome and included exactly the same number and set of included studies then we kept the most recent one.<sup>209</sup> We adopted this procedure not only to avoid overlapping data sets as much as possible, but also not to miss as much any valuable information. We also examined the concordance between selected and non-selected meta-analyses by sensitivity analysis limited to non-selected associations due to overlap (eTable 6).<sup>210</sup>

### Quality assessment

AMSTAR 2<sup>211</sup> assesses whether included meta-analyses clearly defined the research question and inclusion criteria, mentioned an a-priori protocol, explained inclusion criteria, conducted a comprehensive literature search, screened literature and extracted data in



duplicate, provided a list of excluded studies with reason for exclusion, described included studies in detail, assessed risk of bias of included studies, reported on the source of funding, used appropriate statistical methods, accounted for risk of bias for instance with sensitivity analyses, considered risk of bias when interpreting results, explained and discussed any heterogeneity in results, assessed and discussed publication bias, reported any potential conflict of interest. Based on the above listed items, AMSTAR 2 defines a systematic review's quality as high, moderate, low, or critically low. Compared with AMSTAR, AMSTAR 2 also assesses the quality of the studies included in a meta-analysis, without limiting the quality assessment to the technical aspects of the meta-analysis itself. Additionally, compared to ROBIS, AMSTAR has much better agreement among raters.<sup>212</sup>

#### Grading method

We assessed the credibility of the evidence using established criteria published in several umbrella reviews.<sup>208,209,210</sup> Specifically, associations had the strongest validity and were not suggestive of bias (Class I: convincing) whenever they met all the following criteria: had >1000 cases; had p-value <10<sup>-6</sup> based on random-effects meta-analysis; had no evidence of small-study effects and excess significance; had 95% prediction interval (PI) that excluded the null value; the largest study had a nominally significant effect (p<0.05); and had low or moderate between-study heterogeneity (I<sup>2</sup> <50%). Highly suggestive evidence (Class II) required >1000 cases; had p-value <10<sup>-6</sup> based on random-effects meta-analysis; and the largest study had a nominally significant effect (p<0.05). Suggestive evidence (Class III) criteria required only >1000 cases and had p-value <10<sup>-3</sup> based on random-effects meta-analysis. Weak evidence (Class IV) criteria required only all other remained associations with a p-value ≤0.05. These criteria have been proven to provide a systematic and transparent judgment of the methodological flaws that can occur in various meta-analyses. It is well known, that heterogeneity, publication bias, small-study effects, selective reporting, and excess of significant bias in the published meta-analyses can contribute to biased results of a

meta-analyses. Thus, this method appears to be more objective than other quality grading methods because it uses several statistical tests to assess different type of bias and it can work for many types of research questions.<sup>213</sup> Notably, an empirical evaluation of different grading approaches concluded that agreement was poor and that all methods had important shortcomings.<sup>214</sup>

## **eResults.** Supplementary Results

Sensitivity analysis results of convincing and highly suggestive evidence associations from the main analysis

### *Cohort studies (both prospective and retrospective)*

A sensitivity analysis limited to cohort studies showed that none of the associations within class I retained the same rank (Table 3). However, this analysis showed that six associations were supported by highly suggestive evidence (Table 3). These included the increased risk of autism during pregnancy, osteoporotic fractures, pre-term birth and lower APGAR scores at 5 minutes (antidepressants during pregnancy), and suicide attempt/completion in children and adolescents, as well as the decreased risk of suicide attempt/completion in adults and older adults.

The associations between antidepressants and attention-deficit hyperactivity disorder in children, postpartum haemorrhage, and osteoporotic fractures (TCAs) were downgraded to suggestive evidence, while the associations between antidepressants and ASD during pre-pregnancy, severe bleeding, upper gastrointestinal bleeding, and hip fracture were downgraded to weak evidence.

### *Prospective cohort studies*

A sensitivity analysis limited to prospective cohort studies showed that none of the associations within class I retained the same rank (Table 3). The most important change was for highly suggestive associations, with one being upgraded to convincing evidence (preterm birth related to any antidepressant use), while all other were downgraded to lower ranks of evidence. More analytically, the associations between antidepressants and attention-deficit hyperactivity disorder in children, and postpartum haemorrhage were downgraded to suggestive evidence, while the associations with severe bleeding and Apgar score at 5

minutes were downgraded to weak evidence. Finally, the association with autism during pre-pregnancy turned into non-significant.

#### *Studies adjusted for multiple covariates*

When the sensitivity analysis was limited to studies adjusted for multiple potential confounders beyond age and sex (as described in eTable 7 in the Supplement), the association with suicide risk in children and adolescents, the association between any antidepressant and ASD during pre-pregnancy remained at convincing evidence, while five more associations remained at highly suggestive evidence as in the main analysis (Table 5). These included, increased risk of attention-deficit hyperactivity disorder in children, osteoporotic fractures (SSRIs and TCAs), hip fracture (any antidepressant), and upper gastrointestinal bleeding. The positive associations with cataract development, severe bleeding, and postpartum haemorrhage were downgraded to suggestive evidence as well as the protective association with suicide risk in adults, whereas the association with preterm birth, and Apgar score at 5 minutes were downgraded to weak evidence. Finally, the association with autism during pregnancy included only unadjusted estimates and excluded from this analysis.

#### *Confounding by indication*

This analysis included only adjusted studies that were controlled/matched for a psychiatric condition as depicted in eTable 7 in the Supplement. This analysis showed that none of the associations within class I retained the same rank (Table 3). The association with autism during pre-pregnancy was downgraded to highly suggestive, while the association with suicide attempt/completion in children and adolescents was downgraded to weak (Table 4 in the main text). Two more associations, i.e., osteoporotic fractures (SSRIs and TCAs) remained at highly suggestive evidence as in main analysis (Table 3). The associations with attention-deficit hyperactivity disorder in children, postpartum haemorrhage, and the

protective association with suicide risk in adults, were downgraded to suggestive evidence, while the association with preterm birth was downgraded to weak evidence.

#### *High-quality primary studies*

This analysis limited to high-quality primary studies that had a Newcastle-Ottawa Scale (NOS) score bigger than seven (or defined as such by using other instruments) as reported from the original meta-analyses' authors. This analysis showed that the three associations within class I retained the same rank (Table 3). These included the increased risk of autism before and during pregnancy, and suicide attempt and completion in children and adolescents. Seven more associations remained at highly suggestive evidence as in main analysis (Table 3). These included the attention-deficit hyperactivity disorder in children, osteoporotic fractures (SSRIs and TCAs), hip fracture (any antidepressant), postpartum haemorrhage, preterm birth, and the protective association with suicide risk in adults. The remaining associations with cataract development, severe bleeding, upper gastrointestinal bleeding, and Apgar score at 5 minutes were downgraded to weak evidence.

#### *Classes of antidepressants*

A sensitivity analysis limited to SSRIs showed that the associations with increased suicide risk in children and adolescents and autism during pregnancy remained convincing, while another one was upgraded to convincing evidence (lower APGAR scores at 5 minutes). Three more associations were supported by highly suggestive evidence (Table 3). These included the osteoporotic fractures, preterm birth, and the protective association with suicide risk in adults.

When the sensitivity analysis was limited to TCAs, two associations remained at highly suggestive evidence i.e., cataract development and osteoporotic fractures.

The analysis limited to other or mixed antidepressants showed that the association between any antidepressant and autism during pre-pregnancy remained convincing, one association

was upgraded to convincing evidence (preterm birth), while one was downgraded to suggestive evidence (attention-deficit hyperactivity disorder in children). Another one turned into non-significant, i.e, APGAR scores at 5 minutes. Finally, three other associations remained at highly suggestive evidence (Table3). These included severe bleeding, postpartum haemorrhage, and upper gastrointestinal bleeding.

#### *Studies located in Europe*

When the sensitivity analysis was limited to studies located in Europe, the association between SSRIs and autism during pregnancy remained at convincing evidence (Table3), while the association with suicide attempt/completion in children and adolescents was downgraded to weak evidence. Five associations remained at highly suggestive evidence (upper gastrointestinal bleeding, preterm birth, osteoporotic fractures (SSRIs and TCAs), and hip fractures (either TCAs or SSRIs). The association with severe bleeding and the protective association with suicide risk in adults were downgraded to suggestive evidence, while the associations with attention-deficit hyperactivity disorder in children and Apgar score at 5 minutes were downgraded to weak evidence.

#### *Studies located in North America*

When the sensitivity analysis was limited to studies located in North America i.e., USA and Canada, none of the associations within class I retained the same rank (Table 3). Four more associations i.e., osteoporotic fractures (SSRIs and TCAs), hip fractures (either TCAs or SSRIs), and preterm birth remained at highly suggestive evidence as in main analysis (Table 4 in the main text). The associations with autism during pregnancy and severe bleeding were downgraded to suggestive evidence, while the associations with autism before pregnancy, suicide attempt/completion in children and adolescents, attention-deficit hyperactivity disorder in children, postpartum haemorrhage, upper gastrointestinal bleeding, Apgar score at

5 minutes, and the protective association with suicide risk in adults were downgraded to weak evidence.

#### *Studies located in other regions*

When the sensitivity analysis was limited to studies located in other regions, none of the associations within class I and II retained the same rank (Table 3). The associations with postpartum haemorrhage, upper gastrointestinal bleeding, preterm birth, and hip fracture (either TCAs or SSRIs) were downgraded to weak evidence, while the association with severe bleeding turned into non-significant. For the remaining associations within Class I and II there were no available data.

Sensitivity analysis results of non-selected meta-analyses due to overlap

The results from this analysis are presented in eTable 6. Among the 74 associations, that were overlapped between selected and non-selected meta-analyses with adequate data, only three (4.1%) had convincing evidence; the association between any antidepressant before pregnancy and SSRI/any antidepressant during pregnancy and autism spectrum disorders (ASD).<sup>29, 84, 215</sup> Three more associations (4.1%) were supported by highly suggestive evidence. These included the association between SSRI before pregnancy and autism spectrum disorders and osteoporotic fractures.<sup>57, 137, 151, 13</sup> There was suggestive evidence for eight further associations (10.8%) linked to increased risk of adverse health outcomes. For the rest of the associations, there was either weak (n=32 [43.2%]) or no evidence (n=28 [37.8%]; all associations with  $p > 0.05$ ). Overall, we found an agreement between the associations that included in the main analysis and those excluded due to overlap.

## eReferences

1. Ng QXV, N.; Ho, C. Y. X.; Sim, W. S.; Lim, D. Y.; Yeo, W. S. Selective Serotonin Reuptake Inhibitors and Persistent Pulmonary Hypertension of the Newborn: An Update Meta-Analysis. *Journal of women's health (2002)*. 2019;28(3):331-338.
2. Patel KRI, S.; Singam, V.; Rastogi, S.; Silverberg, J. I. Association between atopic dermatitis, depression, and suicidal ideation: A systematic review and meta-analysis. *Journal of the American Academy of Dermatology*. 2019;80(2):402-410.
3. Rexwinkel RZ, J.; van Etten-Jamaludin, F. S.; Benninga, M. A.; Tabbers, M. M. Side effects associated with pharmacotherapy for pediatric irritable bowel syndrome and functional abdominal pain - not otherwise specified: a systematic review. *Expert opinion on drug safety*. 2019;18(2):111-125.
4. Perlman KB, D.; Israel, S.; Rollins, C.; Brown, E.; Tunteng, J. F.; You, R.; You, E.; Tanguay-Sela, M.; Snook, E.; Miresco, M.; Berlim, M. T. A systematic meta-review of predictors of antidepressant treatment outcome in major depressive disorder. *Journal of affective disorders*. 2019;243:503-515.
5. Amare ATS, K. O.; Tekola-Ayele, F.; Hsu, Y. H.;. The association of obesity and coronary artery disease genes with response to SSRIs treatment in major depression. *Journal of neural transmission (Vienna, Austria : 1996)*. 2019;126(1):35-45.
6. Aguiar JPB, A. M.; Martins, A. P.; Leufkens, H. G. M.; Alves da Costa, F. Potentially inappropriate medications with risk of cardiovascular adverse events in the elderly: A systematic review of tools addressing inappropriate prescribing. *Journal of clinical pharmacy and therapeutics*. 2019.
7. Zhou C, Fang L, Chen Y, Zhong J, Wang H, Xie P. Effect of selective serotonin reuptake inhibitors on bone mineral density: a systematic review and meta-analysis. *Osteoporosis international : a journal established as result of cooperation between the European Foundation for Osteoporosis and the National Osteoporosis Foundation of the USA*. 2018;29(6):1243-1251.
8. Wu QL, B.; Tonmoy, S. Depression and risk of fracture and bone loss: an updated meta-analysis of prospective studies. *Osteoporosis international : a journal established as result of cooperation between the European Foundation for Osteoporosis and the National Osteoporosis Foundation of the USA*. 2018.
9. Wang SMH, C.; Bahk, W. M.; Lee, S. J.; Patkar, A. A.; Masand, P. S.; Pae, C. U. Addressing the Side Effects of Contemporary Antidepressant Drugs: A Comprehensive Review. *Chonnam medical journal*. 2018;54(2):101-112.
10. Visco DBM-d-C, R.; Chaves, W. F.; Lacerda, D. C.; Pereira, S. D. C.; Ferraz-Pereira, K. N.; Toscano, A. E. Selective serotonin reuptake inhibitors affect structure, function and metabolism of skeletal muscle: A systematic review. *Pharmacological research*. 2018;136:194-204.
11. Uguz F. Maternal antidepressant use during pregnancy and the risk of attention-deficit/hyperactivity disorder in children: A systematic review of the current literature. *Journal of clinical psychopharmacology*. 2018;38(3):254-259.
12. Tan ECKL, D.; Sandborgh-Englund, G.; Haasum, Y.; Johnell, K. Medications That Cause Dry Mouth As an Adverse Effect in Older People: A Systematic Review and Metaanalysis. *Journal of the American Geriatrics Society*. 2018;66(1):76-84.
13. Telang SW, C.; Olten, B.; Bloch, M. H. Meta-analysis: Second generation antidepressants and headache. *Journal of affective disorders*. 2018;236:60-68.
14. Sepehrpour AHE, M.; Jiskani, A.; Casula, R.; Athanasiou, T. Selective serotonin reuptake inhibitor use and outcomes following cardiac surgery-a systematic review. *Journal of thoracic disease*. 2018;10(2):1112-1120.



15. Prady SLH, I.; Fraser, L. K.; Mikocka-Walus, A. A systematic review of maternal antidepressant use in pregnancy and short- and long-term offspring's outcomes. *Archives of women's mental health*. 2018;21(2):127-140.
16. Cappelletta KB, C.; Johnson, J. A.; Bloch, M. H. Meta-analysis: Risk of dry mouth with second generation antidepressants. *Progress in neuro-psychopharmacology & biological psychiatry*. 2018;84(Pt A):282-293.
17. Steinert TF, W. Epileptic Seizures Under Antidepressive Drug Treatment: Systematic Review. *Pharmacopsychiatry*. 2018;51(4):121-135.
18. Melo GD, K. L.; Rodrigues Filho, R.; Ortega, A. O. L.; Porporatti, A. L.; Dick, B.; Flores-Mir, C.; De Luca Canto, G. Association between psychotropic medications and presence of sleep bruxism: A systematic review. *Journal of oral rehabilitation*. 2018;45(7):545-554.
19. Moncrieff J. What does the latest meta-analysis really tell us about antidepressants? *Epidemiology and psychiatric sciences*. 2018;27(5):430-432.
20. Douros AA, M.; Renoux, C. Risk of Intracranial Hemorrhage Associated with the Use of Antidepressants Inhibiting Serotonin Reuptake: A Systematic Review. *CNS drugs*. 2018;32(4):321-334.
21. Chen LWC, M. Y.; Lian, Z. P.; Lin, H. S.; Chien, C. C.; Yin, H. L.; Chu, Y. H.; Chen, K. Y. Amitriptyline and Sexual Function: A Systematic Review Updated for Sexual Health Practice. *American journal of men's health*. 2018;12(2):370-379.
22. Comoretto RIR, F.; Lucenteforte, E.; Mugelli, A.; Trifiro, G.; Cascini, S.; Roberto, G.; Chinellato, A.; Filippelli, A.; Corrao, G. Bleeding events attributable to concurrent use of warfarin and other medications in high-risk elderly: meta-analysis and Italian population-based investigation. *European journal of clinical pharmacology*. 2018.
23. Varney AW, K.; Agius, M. What are the risks associated with the use of NSAIDs as an adjunct to SSRIs for treatment of depression? An evaluation of current evidence. *Psychiatria Danubina*. 2017;29(Suppl 3):375-382.
24. Uguz F. Is There Any Association Between Use of Antidepressants and Preeclampsia or Gestational Hypertension?: A Systematic Review of Current Studies. *Journal of clinical psychopharmacology*. 2017;37(1):72-77.
25. Salvi VG, I.; Cerveri, G.; Mencacci, C.; Barone-Adesi, F. The risk of new-onset diabetes in antidepressant users - A systematic review and meta-analysis. *PLoS one*. 2017;12(7):e0182088.
26. Stubbs CM, L.; Crawford, S. A.; Wickersham, E. A.; Brockhaus, J. L.; McCarthy, L. H. Do SSRIs and SNRIs reduce the frequency and/or severity of hot flashes in menopausal women. *The Journal of the Oklahoma State Medical Association*. 2017;110(5):272-274.
27. Riediger CS, T.; Barlinn, K.; Maier, S.; Weitz, J.; Siepmann, T. Adverse Effects of Antidepressants for Chronic Pain: A Systematic Review and Meta-analysis. *Frontiers in neurology*. 2017;8:307.
28. Querido AL. Diving and antidepressants. *Diving Hyperb Med*. 2017;47(4):253-256.
29. Mezzacappa AL, P. A.; Gianfagna, F.; Cazas, O.; Hardy, P.; Falissard, B.; Sutter-Dallay, A. L.; Gressier, F. Risk for Autism Spectrum Disorders According to Period of Prenatal Antidepressant Exposure: A Systematic Review and Meta-analysis. *JAMA pediatrics*. 2017;171(6):555-563.
30. Maund EG, L. S.; Gøtzsche, P. C. Considering benefits and harms of duloxetine for treatment of stress urinary incontinence: A meta-analysis of clinical study reports. *CMAJ : Canadian Medical Association journal = journal de l'Association medicale canadienne*. 2017;189(5):E194-E203.
31. Moraros JN, C.; Patten, S. B.; Mousseau, D. D. The association of antidepressant drug usage with cognitive impairment or dementia, including Alzheimer disease: A systematic review and meta-analysis. *Depression and anxiety*. 2017;34(3):217-226.
32. Locher CK, H.; Zion, S. R.; Werner, C.; Pine, D. S.; Kirsch, I.; Kessler, R. C.; Kossowsky, J. Efficacy and Safety of Selective Serotonin Reuptake Inhibitors, Serotonin-Norepinephrine Reuptake Inhibitors, and Placebo for Common Psychiatric Disorders Among Children and Adolescents: A Systematic Review and Meta-analysis. *JAMA psychiatry*. 2017;74(10):1011-1020.

33. Laux GB, B.; Hajak, G.; Lemke, M.; Volz, H. P. Pooled Analysis of Four Non-Interventional Studies: Effectiveness and Tolerability of the Antidepressant Agomelatine in Daily Practice. *Advances in therapy*. 2017;34(4):895-914.
34. Kaplan YCK-A, E.; Acar, S.; Sozmen, K. Maternal SSRI discontinuation, use, psychiatric disorder and the risk of autism in children: a meta-analysis of cohort studies. *British journal of clinical pharmacology*. 2017;83(12):2798-2806.
35. Heller HMR, A. C. J.; Bruning, A. H. L.; de Groot, C. J. M.; Scheele, F.; van Pampus, M. G.; Honig, A. Increased postpartum haemorrhage, the possible relation with serotonergic and other psychopharmacological drugs: a matched cohort study. *BMC pregnancy and childbirth*. 2017;17(1):166.
36. Hill LLL, V. L.; Winbrock, E. L.; Li, G.; Chihuri, S.; Lee, K. C. Depression, antidepressants and driving safety. *Injury epidemiology*. 2017;4(1):10.
37. Deidda AP, C.; Micheletto, L.; Bocchetta, A.; Del Zompo, M.; Stochino, M. E. Interstitial lung disease induced by fluoxetine: Systematic review of literature and analysis of Vigibase, Eudravigilance and a national pharmacovigilance database. *Pharmacological research*. 2017;120:294-301.
38. Brunnauer AL, G. Driving Under the Influence of Antidepressants: A Systematic Review and Update of the Evidence of Experimental and Controlled Clinical Studies. *Pharmacopsychiatry*. 2017;50(5):173-181.
39. Brown HKH-S, N.; Lunsby, Y.; Dennis, C. E.; Vigod, S. N. The Association Between Antenatal Exposure to Selective Serotonin Reuptake Inhibitors and Autism: A Systematic Review and Meta-Analysis. *The Journal of clinical psychiatry*. 2017;78(1):e48-e58.
40. Beyer CC, K.; Johnson, J. A.; Bloch, M. H. Meta-analysis: Risk of hyperhidrosis with second-generation antidepressants. *Depression and anxiety*. 2017;34(12):1134-1146.
41. Andrade C. Antidepressant Exposure During Pregnancy and Risk of Autism in the Offspring, 1: Meta-Review of Meta-Analyses. *The Journal of clinical psychiatry*. 2017;78(8):e1047-e1051.
42. Allain NL, C.; Falissard, B.; Allain, J. S.; Batail, J. M.; Polard, E.; Montastruc, F.; Drapier, D.; Naudet, F. Manic switches induced by antidepressants: an umbrella review comparing randomized controlled trials and observational studies. *Acta psychiatrica Scandinavica*. 2017;135(2):106-116.
43. Vlachos KG, S.; Efremidis, M.; Sideris, A.; Letsas, K. P. An update on risk factors for drug-induced arrhythmias. *Expert review of clinical pharmacology*. 2016;9(1):117-127.
44. Werneke UJ, F.; Taylor, D. M.; Ott, M. Conundrums in neurology: diagnosing serotonin syndrome - a meta-analysis of cases. *BMC neurology*. 2016;16:97.
45. Warden SJF, R. K. Do Selective Serotonin Reuptake Inhibitors (SSRIs) Cause Fractures? *Current osteoporosis reports*. 2016;14(5):211-218.
46. Torjesen I. SSRIs double the risk of suicide and violence in healthy adults. *BMJ (Online)*. 2016;355.
47. Stone M. Suicidality and aggression during antidepressant treatment: Authors misinterpreted earlier paper from the FDA. *BMJ (Online)*. 2016;352.
48. Smit MD, K. M.; Honig, A. Mirtazapine in pregnancy and lactation - A systematic review. *European neuropsychopharmacology : the journal of the European College of Neuropsychopharmacology*. 2016;26(1):126-135.
49. Simonsen ALD, P. B.; Gotzsche, P. C. Persistent sexual dysfunction after early exposure to SSRIs: Systematic review of animal studies. *The International journal of risk & safety in medicine*. 2016;28(1):1-12.
50. Sharma TG, L. S.; Freund, N.; Gotzsche, P. C. Suicidality and aggression during antidepressant treatment: systematic review and meta-analyses based on clinical study reports. *BMJ (Clinical research ed)*. 2016;352:i65.
51. Selmer RH, B.; Furu, K.; Andersen, M.; Norgaard, M.; Zoega, H.; Kieler, H. Individual-based versus aggregate meta-analysis in multi-database studies of pregnancy outcomes: the Nordic example of selective serotonin reuptake inhibitors and venlafaxine in pregnancy. *Pharmacoepidemiology and drug safety*. 2016;25(10):1160-1169.

52. Rudisill TMZ, M.; Kelley, G. A.; Pilkerton, C.; Rudisill, B. R. Medication use and the risk of motor vehicle collisions among licensed drivers: A systematic review. *Accident; analysis and prevention*. 2016;96:255-270.
53. Pozzi MR, S.; Clementi, E.; Molteni, M.; Nobile, M. Antidepressants and, suicide and self-injury: Causal or casual association? *International journal of psychiatry in clinical practice*. 2016;20(1):47-51.
54. Potočnjak ID, V.; Vukičević Baudoin, D.; Čulig, J.; Jakovljević, M. Cardiovascular side effects of psychopharmacologic therapy. *International journal of cardiology*. 2016;219:367-372.
55. Muzik MH, S. E. Use of Antidepressants During Pregnancy?: What to Consider when Weighing Treatment with Antidepressants Against Untreated Depression. *Maternal and child health journal*. 2016;20(11):2268-2279.
56. Lassen D, Ennis ZN, Damkier P. First-Trimester Pregnancy Exposure to Venlafaxine or Duloxetine and Risk of Major Congenital Malformations: A Systematic Review. *Basic & clinical pharmacology & toxicology*. 2016;118(1):32-36.
57. Kaplan YC, Keskin-Arslan E, Acar S, Sozmen K. Prenatal selective serotonin reuptake inhibitor use and the risk of autism spectrum disorder in children: A systematic review and meta-analysis. *Reproductive toxicology (Elmsford, NY)*. 2016;66:31-43.
58. Kobayashi T, Matsuyama T, Takeuchi M, Ito S. Autism spectrum disorder and prenatal exposure to selective serotonin reuptake inhibitors: A systematic review and meta-analysis. *Reproductive toxicology (Elmsford, NY)*. 2016;65:170-178.
59. Jordan SM, J. K.; Davies, G. I.; Tucker, D.; Thayer, D. S.; Luteijn, J. M.; Morgan, M.; Garne, E.; Hansen, A. V.; Klungsoyr, K.; Engeland, A.; Boyle, B.; Dolk, H. Selective Serotonin Reuptake Inhibitor (SSRI) Antidepressants in Pregnancy and Congenital Anomalies: Analysis of Linked Databases in Wales, Norway and Funen, Denmark. *PloS one*. 2016;11(12):e0165122.
60. Jarde AM, M.; Kingston, D.; Giallo, R.; MacQueen, G. M.; Giglia, L.; Beyene, J.; Wang, Y.; McDonald, S. D. Neonatal Outcomes in Women With Untreated Antenatal Depression Compared With Women Without Depression: A Systematic Review and Meta-analysis. *JAMA psychiatry*. 2016;73(8):826-837.
61. Howland RH. Antidepressant Drugs and the Risk of Intracranial Bleeding: Parsing an Observational Study. *Journal of psychosocial nursing and mental health services*. 2016;54(2):21-24.
62. Galling BR, A.; Nielsen, R. E.; Nielsen, J.; Gerhard, T.; Carbon, M.; Stubbs, B.; Vancampfort, D.; De Hert, M.; Olfson, M.; Kahl, K. G.; Martin, A.; Guo, J. J.; Lane, H. Y.; Sung, F. C.; Liao, C. H.; Arango, C.; Correll, C. U. Type 2 Diabetes Mellitus in Youth Exposed to Antipsychotics: A Systematic Review and Meta-analysis. *JAMA psychiatry*. 2016;73(3):247-259.
63. Donneyong MMB, K.; Bosco-Levy, P.; Dong, Y. H.; Levin, R.; Gagne, J. J. Risk of mortality with concomitant use of tamoxifen and selective serotonin reuptake inhibitors: multi-database cohort study. *BMJ (Clinical research ed)*. 2016;354:i5014.
64. Cameron DHR, M. J. Antidepressants and Driving in Older Adults: A Systematic Review. *Canadian journal on aging = La revue canadienne du vieillissement*. 2016;35 Suppl 1:7-14.
65. Braun CB, T.; Franklin, J.; Baethge, C. Suicides and Suicide Attempts during Long-Term Treatment with Antidepressants: A Meta-Analysis of 29 Placebo-Controlled Studies Including 6,934 Patients with Major Depressive Disorder. *Psychotherapy and psychosomatics*. 2016;85(3):171-179.
66. Bielefeldt AOD, P. B.; Gotzsche, P. C. Precursors to suicidality and violence on antidepressants: systematic review of trials in adult healthy volunteers. *Journal of the Royal Society of Medicine*. 2016;109(10):381-392.
67. Barth MK, L.; Klostermann, S.; Barbui, C.; Cipriani, A.; Linde, K. Efficacy of selective serotonin reuptake inhibitors and adverse events: meta-regression and mediation analysis of placebo-controlled trials. *The British journal of psychiatry : the journal of mental science*. 2016;208(2):114-119.
68. Akioyamen LEM, H.; Holloway, A. C.; Taylor, V. H.; Akioyamen, N. O.; Sherifali, D. Effects of depression pharmacotherapy in fertility treatment on conception, birth, and neonatal health: A systematic review. *Journal of psychosomatic research*. 2016;84:69-80.

69. Alvares GAQ, D. S.; Hickie, I. B.; Guastella, A. J. Autonomic nervous system dysfunction in psychiatric disorders and the impact of psychotropic medications: a systematic review and meta-analysis. *Journal of psychiatry & neuroscience : JPN*. 2016;41(2):89-104.
70. Wang SY, L.; Wang, L.; Gao, L.; Xu, B.; Xiong, Y. Selective Serotonin Reuptake Inhibitors (SSRIs) and the Risk of Congenital Heart Defects: A Meta-Analysis of Prospective Cohort Studies. *Journal of the American Heart Association*. 2015;4(5).
71. Uchida MS, Andrea E.; Biederman, Joseph; Castro, Victor M.; Kenworthy, Tara; Chan, James; Rosales, Ana M.; Newton-Cheh, Christopher; Perlis, Roy H. A systematic evaluation of the QTc interval and antidepressants in youth: An electronic health record study. *Journal of Developmental and Behavioral Pediatrics*. 2015;36(6):434-439.
72. Thase MEF, R.; Cheng, R. F.; Guico-Pabia, C. J.; Sporn, J.; Boucher, M.; Tourian, K. A. Effects of desvenlafaxine on blood pressure in patients treated for major depressive disorder: a pooled analysis. *Current medical research and opinion*. 2015;31(4):809-820.
73. Teo IS, C. T. Assessing the Risks Associated with Antidepressant Use in Plastic Surgery: A Systematic Review. *Plastic and reconstructive surgery*. 2015;136(5):1107-1119.
74. Tampi RRB, M.; Carter, K. V.; Tampi, D. J.; Moca, M.; Knudsen, A.; May, J. Citalopram, QTc Prolongation, and Torsades de Pointes. *Psychosomatics*. 2015;56(1):36-43.
75. Stubbs B. A meta-analysis investigating falls in older adults taking selective serotonin reuptake inhibitors confirms an association but by no means implies causation. *The American Journal of Geriatric Psychiatry*. 2015;23(10):1098-1098.
76. Santarsieri DS, T. L. Antidepressant efficacy and side-effect burden: A quick guide for clinicians. *Drugs in Context*. 2015;4.
77. Robinson GE. Controversies about the use of antidepressants in pregnancy: Response to Dr. Casper, Dr. Osborne, and Dr. Payne. *Journal of Nervous and Mental Disease*. 2015;203(6):480-480.
78. Renoux CL, L. M.; Patenaude, V.; Bresee, L. C.; Paterson, J. M.; Lafrance, J. P.; Tamim, H.; Mahmud, S. M.; Alsabbagh, M. W.; Hemmelgarn, B.; Dormuth, C. R.; Ernst, P. Serotonin-Norepinephrine Reuptake Inhibitors and the Risk of AKI: A Cohort Study of Eight Administrative Databases and Meta-Analysis. *Clinical journal of the American Society of Nephrology : CJASN*. 2015;10(10):1716-1722.
79. Pinheiro EB, Debra L.; Hoxha, Denada; Ciolino, Jody D.; Wisner, Katherine L. Sertraline and breastfeeding: Review and meta-analysis. *Archives of women's mental health*. 2015;18(2):139-146.
80. Orsolini LB, C. Serotonin reuptake inhibitors and breastfeeding: a systematic review. *Human psychopharmacology*. 2015;30(1):4-20.
81. Olfson MG, T. Re-examining antidepressant risk of self-injury in children and adolescents. *Pharmacoepidemiology and drug safety*. 2015;24(2):215-217.
82. Nezafati MHV, M.; Nezafati, P. Antidepressants and cardiovascular adverse events: A narrative review. *ARYA atherosclerosis*. 2015;11(5):295-304.
83. Mohler JF, M.; Chen, Z.; Lee, J. K.; Thienhaus, O. J. Depression, antidepressants, and bone health in older adults: a systematic review. *Journal of the American Geriatrics Society*. 2015;63(3):623-624.
84. Man KKT, H. H.; Wong, L. Y.; Chan, E. W.; Simonoff, E.; Wong, I. C. Exposure to selective serotonin reuptake inhibitors during pregnancy and risk of autism spectrum disorder in children: a systematic review and meta-analysis of observational studies. *Neuroscience and biobehavioral reviews*. 2015;49:82-89.
85. KoKoAung E, Cavenett S, McArthur A, Aromataris E. The association between suicidality and treatment with selective serotonin reuptake inhibitors in older people with major depression: a systematic review. *JBIC database of systematic reviews and implementation reports*. 2015;13(3):174-205.
86. Gøtzsche PCY, A. H.; Crace, J. Does long term use of psychiatric drugs cause more harm than good? *BMJ (Online)*. 2015;350.
87. Gentile S. Prenatal antidepressant exposure and the risk of autism spectrum disorders in children. Are we looking at the fall of Gods? *Journal of affective disorders*. 2015;182:132-137.

88. Gentile S. Early pregnancy exposure to selective serotonin reuptake inhibitors, risks of major structural malformations, and hypothesized teratogenic mechanisms. *Expert opinion on drug metabolism & toxicology*. 2015;11(10):1585-1597.
89. Gebara MAL, K. L.; Karp, J. F.; Nash, M. C.; Iaboni, A.; Lenze, E. J. Cause or Effect? Selective Serotonin Reuptake Inhibitors and Falls in Older Adults: A Systematic Review. *The American journal of geriatric psychiatry : official journal of the American Association for Geriatric Psychiatry*. 2015;23(10):1016-1028.
90. Ennis ZND, P. Pregnancy exposure to olanzapine, quetiapine, risperidone, aripiprazole and risk of congenital malformations. A systematic review. *Basic & clinical pharmacology & toxicology*. 2015;116(4):315-320.
91. Davis JMR, C. E. Do antipsychotics cause hip fractures? Promise and pitfalls of big data. *Journal of Clinical Psychiatry*. 2015;76(9):e1155-e1156.
92. Correll CUD, J.; De Lepeleire, J.; De Hert, M. Effects of antipsychotics, antidepressants and mood stabilizers on risk for physical diseases in people with schizophrenia, depression and bipolar disorder. *World psychiatry : official journal of the World Psychiatric Association (WPA)*. 2015;14(2):119-136.
93. Bruning AHH, H. M.; Kieviet, N.; Bakker, P. C.; de Groot, C. J.; Dolman, K. M.; Honig, A. Antidepressants during pregnancy and postpartum hemorrhage: a systematic review. *European journal of obstetrics, gynecology, and reproductive biology*. 2015;189:38-47.
94. Stevenson JMW, J. L.; Burnham, T. G.; Prevost, A. T.; Schiff, R.; Erskine, S. D.; Davies, J. G. Predicting adverse drug reactions in older adults; A systematic review of the risk prediction models. *Clinical Interventions in Aging*. 2014;9:1581-1593.
95. Ross LEG, Sophie. Selected pregnancy and delivery outcomes after exposure to antidepressant medication. *JAMA psychiatry*. 2014;71(6):716-717.
96. Rais TBR, Alexandra. Association between antidepressants use during pregnancy and autistic spectrum disorders: A meta-analysis. *Innovations in clinical neuroscience*. 2014;11(5-6):18-22.
97. Park HS, H.; Miki, A.; Urushihara, H.; Sawada, Y. Medications associated with falls in older people: systematic review of publications from a recent 5-year period. *European journal of clinical pharmacology*. 2015;71(12):1429-1440.
98. Prieto-Alhambra DP, H.; Goldenberg, J. S.; Khong, T. P.; Klungel, O. H.; Robinson, N. J.; de Vries, F. Excess risk of hip fractures attributable to the use of antidepressants in five European countries and the USA. *Osteoporosis international : a journal established as result of cooperation between the European Foundation for Osteoporosis and the National Osteoporosis Foundation of the USA*. 2014;25(3):847-855.
99. Previti GP, S.; Chowdhury, S.; Aguglia, E.; Pariante, C. M. Neurodevelopmental outcome for offspring of women treated for antenatal depression: a systematic review. *Archives of women's mental health*. 2014;17(6):471-483.
100. Pereira AC, Y.; Gitlin, M. J.; Dworkin, R. H. Suicidal ideation and behavior associated with antidepressant medications: Implications for the treatment of chronic pain. *Pain*. 2014;155(12):2471-2475.
101. Pedersen LH. Meta-analysis: antidepressant exposure during pregnancy is associated with poor neonatal adaptation. *Evidence-based medicine*. 2014;19(2):76.
102. Paumgartten FJ. Developmental risks associated with use of psychoactive drugs during pregnancy are largely unknown. *Revista Brasileira de Psiquiatria*. 2014;36(4):359.
103. Okazaki R. [Fracture risk associated with drugs other than glucocorticoids]. *Clinical calcium*. 2014;24(3):357-365.
104. Oka YO, K.; Kawashita, N.; Shirakuni, Y.; Takagi, T. Meta-analysis of the risk of upper gastrointestinal hemorrhage with combination therapy of selective serotonin reuptake inhibitors and non-steroidal anti-inflammatory drugs. *Biological & pharmaceutical bulletin*. 2014;37(6):947-953.
105. McDonagh MSM, A.; Phillip, C.; Romm, J.; Peterson, K.; Thakurta, S.; Guise, J. M. Depression drug treatment outcomes in pregnancy and the postpartum period: a systematic review and meta-analysis. *Obstetrics and gynecology*. 2014;124(3):526-534.

106. Mahdanian AAR, S.; Bacon, S. L.; Ozdin, D.; Lavoie, K. L.; Looper, K. Serotonergic antidepressants and perioperative bleeding risk: a systematic review. *Expert opinion on drug safety*. 2014;13(6):695-704.
107. Mago RT, N.; Andrade, C. Cardiovascular adverse effects of newer antidepressants. *Expert review of neurotherapeutics*. 2014;14(5):539-551.
108. Lorenzo LE, A. Antidepressant use in pregnancy: an evaluation of adverse outcomes excluding malformation. *The Israel journal of psychiatry and related sciences*. 2014;51(2):94-104.
109. Li WL, W.; Wan, Y.; Ren, J.; Li, T.; Li, C. Appraisal of the methodological quality and summary of the findings of systematic reviews on the relationship between SSRIs and suicidality. *Shanghai archives of psychiatry*. 2014;26(5):248-258.
110. Isacson GR, C. L. Antidepressant drugs and the risk of suicide in children and adolescents. *Paediatric drugs*. 2014;16(2):115-122.
111. Grigoriadis S. The effects of antidepressant medications on mothers and babies. *Journal of population therapeutics and clinical pharmacology = Journal de la therapeutique des populations et de la pharmacologie clinique*. 2014;21(3):e533-541.
112. Gebara MAS, M. L.; Lipsey, K. L.; Teitelbaum, S. L.; Civitelli, R.; Muller, D. J.; Reynolds, C. F., 3rd; Mulsant, B. H.; Lenze, E. J. Depression, antidepressants, and bone health in older adults: a systematic review. *Journal of the American Geriatrics Society*. 2014;62(8):1434-1441.
113. Fanoë SK, D.; Fink-Jensen, A.; Jensen, H. K.; Toft, E.; Nielsen, J.; Videbech, P.; Pehrson, S.; Bundgaard, H. Risk of arrhythmia induced by psychotropic medications: A proposal for clinical management. *European Heart Journal*. 2014;35(20):1306-1315b.
114. El Marroun HW, T.; Verhulst, F. C.; Tiemeier, H. Maternal use of antidepressant or anxiolytic medication during pregnancy and childhood neurodevelopmental outcomes: a systematic review. *European child & adolescent psychiatry*. 2014;23(10):973-992.
115. Costoloni GP, E.; Goracci, A.; Bolognesi, S.; Fagiolini, A. [Mood stabilisers and pregnancy outcomes - a review]. *Psychiatria polska*. 2014;48(5):865-887.
116. Clayton AHC, H. A.; Handiwala, L. Antidepressants and sexual dysfunction: Mechanisms and clinical implications. *Postgraduate medicine*. 2014;126(2):91-99.
117. Beach SRK, W. J.; Celano, C. M.; Januzzi, J. L.; Ruskin, J. N.; Noseworthy, P. A.; Huffman, J. C. Meta-analysis of selective serotonin reuptake inhibitor-associated QTc prolongation. *The Journal of clinical psychiatry*. 2014;75(5):e441-449.
118. Anglin RY, Y.; Moayyedi, P.; Tse, F.; Armstrong, D.; Leontiadis, G. I. Risk of upper gastrointestinal bleeding with selective serotonin reuptake inhibitors with or without concurrent nonsteroidal anti-inflammatory use: a systematic review and meta-analysis. *The American journal of gastroenterology*. 2014;109(6):811-819.
119. Andrade C. Antidepressants and testicular cancer: cause versus association. *The Journal of clinical psychiatry*. 2014;75(3):e198-200.
120. Rotella FM, E. Depression as a risk factor for diabetes: a meta-analysis of longitudinal studies. *The Journal of clinical psychiatry*. 2013;74(1):31-37.
121. Rabenda VN, D.; Beaudart, C.; Bruyere, O.; Reginster, J. Y. Relationship between use of antidepressants and risk of fractures: a meta-analysis. *Osteoporosis international : a journal established as result of cooperation between the European Foundation for Osteoporosis and the National Osteoporosis Foundation of the USA*. 2013;24(1):121-137.
122. Painuly NP, Ritu; Heun, Reinhard; Sharan, Pratap. Risk of cardiovascular malformations after exposure to paroxetine in pregnancy: Meta-analysis. *The Psychiatrist*. 2013;37(6):198-203.
123. Nassir Ghaemi SV, P. A.; Whitham, E. A. Antidepressants from a public health perspective: Re-examining effectiveness, suicide, and carcinogenicity. *Acta psychiatrica Scandinavica*. 2013;127(2):89-93.
124. Myles NN, H.; Ward, H.; Large, M. Systematic meta-analysis of individual selective serotonin reuptake inhibitor medications and congenital malformations. *The Australian and New Zealand journal of psychiatry*. 2013;47(11):1002-1012.
125. Mintzes B. A leap of faith in antidepressant treatment? *JAMA psychiatry*. 2013;70(12):1-1.
126. Kennedy D. Choosing an SSRI in pregnancy: Clinical context versus statistical significance. *Australian and New Zealand Journal of Psychiatry*. 2013;47(12):1101-1103.

127. Howland RH. Antidepressant medication and pregnancy: time for randomized controlled trials. *J Psychosoc Nurs Ment Health Serv.* 2013;51(2):11-14.
128. Grigoriadis SV, E. H.; Mamisashvili, L.; Roerecke, M.; Rehm, J.; Dennis, C. L.; Koren, G.; Steiner, M.; Mousmanis, P.; Cheung, A.; Ross, L. E. Antidepressant exposure during pregnancy and congenital malformations: is there an association? A systematic review and meta-analysis of the best evidence. *The Journal of clinical psychiatry.* 2013;74(4):e293-308.
129. Grigoriadis SM, L.; Ross, L. E. Achieving the balance: treating depressed pregnant women with antidepressants. *The Journal of clinical psychiatry.* 2013;74(4):375-376.
130. Gahr MS-L, C.; Kölle, M. A.; Freudenmann, R. W. Intoxications with the monoamine oxidase inhibitor tranylcypromine: An analysis of fatal and non-fatal events. *European Neuropsychopharmacology.* 2013;23(11):1364-1372.
131. de Jong MRVDE, M.; Hartholt, K. A. Drug-related falls in older patients: Implicated drugs, consequences, and possible prevention strategies. *Therapeutic Advances in Drug Safety.* 2013;4(4):147-154.
132. de Groot MHvC, J. P.; Moek, M. A.; Tulner, L. R.; Beijnen, J. H.; Lamoth, C. J. The effects of fall-risk-increasing drugs on postural control: a literature review. *Drugs & aging.* 2013;30(11):901-920.
133. Brunnauer AL, G. The effects of most commonly prescribed second generation antidepressants on driving ability: A systematic review: 70th Birthday Prof. Riederer. *Journal of Neural Transmission.* 2013;120(1):225-232.
134. Bhattacharjee SB, R.; Kelley, G. A.; Sambamoorthi, U. Antidepressant use and new-onset diabetes: a systematic review and meta-analysis. *Diabetes/metabolism research and reviews.* 2013;29(4):273-284.
135. Barnard KP, R. C.; Holt, R. I. Antidepressant medication as a risk factor for type 2 diabetes and impaired glucose regulation: systematic review. *Diabetes care.* 2013;36(10):3337-3345.
136. Al-Zoairy RR, C.; Tschoner, A.; Kaser, S.; Ebenbichler, C. The effects of psychotropic drugs on the regulation of glucose metabolism. *Current diabetes reviews.* 2013;9(5):362-370.
137. Wu QB, A. F.; Hentz, J. G.; Crowell, M. D. Selective serotonin reuptake inhibitor treatment and risk of fractures: a meta-analysis of cohort and case-control studies. *Osteoporosis international : a journal established as result of cooperation between the European Foundation for Osteoporosis and the National Osteoporosis Foundation of the USA.* 2012;23(1):365-375.
138. t Jong GWE, T.; Koren, G.; Einarson, A. Antidepressant use in pregnancy and persistent pulmonary hypertension of the newborn (PPHN): a systematic review. *Reproductive toxicology (Elmsford, NY).* 2012;34(3):293-297.
139. Sansone RAS, L. A. SSRIs: bad to the bone? *Innovations in clinical neuroscience.* 2012;9(7-8):42-47.
140. Pan AS, Q.; Okereke, O. I.; Rexrode, K. M.; Rubin, R. R.; Lucas, M.; Willett, W. C.; Manson, J. E.; Hu, F. B. Use of antidepressant medication and risk of type 2 diabetes: results from three cohorts of US adults. *Diabetologia.* 2012;55(1):63-72.
141. Oyebo FR, A.; Berrisford, G.; Coccia, F. Psychotropics in pregnancy: safety and other considerations. *Pharmacology & therapeutics.* 2012;135(1):71-77.
142. Nischal AT, A.; Nischal, A.; Trivedi, J. K. Suicide and antidepressants: What current evidence indicates. *Mens sana monographs.* 2012;10(1):33-44.
143. Malm H. Prenatal exposure to selective serotonin reuptake inhibitors and infant outcome. *Therapeutic drug monitoring.* 2012;34(6):607-614.
144. Lopez-Yarto MR-M, E.; Holloway, A. C.; Taylor, V. H.; McDonald, S. D. Do psychiatric medications, especially antidepressants, adversely impact maternal metabolic outcomes? *Journal of affective disorders.* 2012;141(2-3):120-129.
145. Kucukaycan MVDE, F.; Moreels, T.; Sabbe, B. G. [Antidepressants and the risk of bleeding]. *Tijdschrift voor psychiatrie.* 2012;54(3):225-234.
146. KoKoAung EA, E. The association between suicidality and treatment with selective serotonin reuptake inhibitors in older people with major depression: A systematic review. *JBI library of systematic reviews.* 2012;10(56 SUPPL):S313-S324.

147. Hennings JMS, L.; Fulda, S. Glucose metabolism and antidepressant medication. *Current pharmaceutical design*. 2012;18(32):5900-5919.
148. Hackam DGM, M. Selective serotonin reuptake inhibitors and brain hemorrhage: a meta-analysis. *Neurology*. 2012;79(18):1862-1865.
149. Grzeskowiak LEG, A. L.; Morrison, J. L. Exposed or not exposed? Exploring exposure classification in studies using administrative data to investigate outcomes following medication use during pregnancy. *European journal of clinical pharmacology*. 2012;68(5):459-467.
150. Einarson A. Publishing statistically significant results with questionable clinical importance: focus on antidepressant use in pregnancy. *The Journal of clinical psychiatry*. 2012;73(11):1443-1446.
151. Eom CS, Lee HK, Ye S, Park SM, Cho KH. Use of selective serotonin reuptake inhibitors and risk of fracture: a systematic review and meta-analysis. *J Bone Miner Res*. 2012;27(5):1186-1195.
152. Colotto MV, F.; Vo Hong, N.; Raimo, O.; Castello, A.; Carnovale, A.; Paciaroni, A.; Coletta, P. [Effect of treatment with selective serotonin reuptake inhibitors on lipid profile: state of the art]. *La Clinica terapeutica*. 2012;163(1):e41-45.
153. Bromley RLW, A.; Makarova, D.; Tower, C.; Wood, A.; Clayton-Smith, J. Fetal effects of selective serotonin reuptake inhibitor treatment during pregnancy: Immediate and longer term child outcomes. *Fetal and Maternal Medicine Review*. 2012;23(3-4):230-275.
154. Adams KB, C.; van der Heijde, D. M. Safety of pain therapy during pregnancy and lactation in patients with inflammatory arthritis: a systematic literature review. *The Journal of rheumatology Supplement*. 2012;90:59-61.
155. Gentile SG, M. Prenatal exposure to antidepressant medications and neurodevelopmental outcomes: a systematic review. *Journal of affective disorders*. 2011;128(1-2):1-9.
156. Gentile S. Neonatal withdrawal reactions following late in utero exposure to antidepressant medications. *Current Women's Health Reviews*. 2011;7(1):18-27.
157. Fenger-Gron JT, M.; Andersen, K. S.; Nielsen, R. G. Paediatric outcomes following intrauterine exposure to serotonin reuptake inhibitors: a systematic review. *Danish medical bulletin*. 2011;58(9):A4303.
158. Davanzo RC, M.; De Cunto, A.; Minen, F.; Amaddeo, A. Antidepressant drugs and breastfeeding: a review of the literature. *Breastfeeding medicine : the official journal of the Academy of Breastfeeding Medicine*. 2011;6(2):89-98.
159. Dassanayake TM, P.; Carter, G.; Jones, A. Effects of benzodiazepines, antidepressants and opioids on driving: a systematic review and meta-analysis of epidemiological and experimental evidence. *Drug safety*. 2011;34(2):125-156.
160. Berkowitz RIF, A. N. Obesity, psychiatric status, and psychiatric medications. *Psychiatric Clinics of North America*. 2011;34(4):747-764.
161. Barbui C. Getting through the quicksand of the relationship between drugs and suicide. *Drug safety*. 2011;34(5):397-401.
162. Wurst KEP, C.; Ephross, S. A.; Olshan, A. F. First trimester paroxetine use and the prevalence of congenital, specifically cardiac, defects: a meta-analysis of epidemiological studies. *Birth defects research Part A, Clinical and molecular teratology*. 2010;88(3):159-170.
163. Wu QL, J.; Gallegos-Orozco, J. F.; Hentz, J. G. Depression, fracture risk, and bone loss: a meta-analysis of cohort studies. *Osteoporosis international : a journal established as result of cooperation between the European Foundation for Osteoporosis and the National Osteoporosis Foundation of the USA*. 2010;21(10):1627-1635.
164. van Driel JJW, J. H.; Heres, M. H.; Honig, A. [Intrauterine exposure to SSRIs: no reason for routine hypoglycaemia screening]. *Nederlands tijdschrift voor geneeskunde*. 2010;154(8):A339.
165. Udechuku AN, T.; Hill, R.; Szego, K. Antidepressants in pregnancy: a systematic review. *The Australian and New Zealand journal of psychiatry*. 2010;44(11):978-996.
166. Tuccori MM, S.; Testi, A.; Ruggiero, E.; Mantarro, S.; Scollo, C.; Pergola, A.; Fornai, M.; Antonioli, L.; Colucci, R.; Corona, T.; Blandizzi, C. Use of selective serotonin reuptake



- inhibitors during pregnancy and risk of major and cardiovascular malformations: an update. *Postgraduate medicine*. 2010;122(4):49-65.
167. Simoncelli MM, B. Z.; Berard, A. Antidepressant use during pregnancy: a critical systematic review of the literature. *Current drug safety*. 2010;5(2):153-170.
  168. Scialli AR. Paroxetine exposure during pregnancy and cardiac malformations. *Birth defects research Part A, Clinical and molecular teratology*. 2010;88(3):175-177.
  169. Kemp AH, Quintana DS, Gray MA, Felmingham KL, Brown K, Gatt JM. Impact of depression and antidepressant treatment on heart rate variability: a review and meta-analysis. *Biological psychiatry*. 2010;67(11):1067-1074.
  170. Kölch MP, P.; Allroggen, M.; Fegert, J. M. Does behavioural toxicity of SSRI increased risk for school shootings? *Nervenheilkunde*. 2010;29(7-8):451-455.
  171. Kontakioti EB, Z.; Tsiaousi, M.; Mironidou-Tzouveleki, M. Selective serotonin reuptake inhibitors in pregnancy and breastfeeding. *Epitheorese Klinikes Farmakologias kai Farmakokinetikes*. 2010;28(3):249-268.
  172. Einarson AK, G. First trimester exposure to paroxetine and prevalence of cardiac defects: Meta-analysis of the literature: Unfortunately incomplete. *Birth defects research Part A, Clinical and molecular teratology*. 2010;88(7):588; author reply 589.
  173. Einarson A. Paroxetine use in pregnancy and increased risk of heart defects: Evaluating the evidence. *Canadian family physician Medecin de famille canadien*. 2010;56(8):767-768.
  174. Berard A. Paroxetine exposure during pregnancy and the risk of cardiac malformations: what is the evidence? *Birth defects research Part A, Clinical and molecular teratology*. 2010;88(3):171-174.
  175. Woolcott JCR, K. J.; Wiens, M. O.; Patel, B.; Marin, J.; Khan, K. M.; Marra, C. A. Meta-analysis of the impact of 9 medication classes on falls in elderly persons. *Archives of internal medicine*. 2009;169(21):1952-1960.
  176. Fortinguerra FC, A.; Bonati, M. Psychotropic drug use during breastfeeding: A review of the evidence. *Pediatrics*. 2009;124(4):e547-e556.
  177. Bergemann N. Antidepressant use during pregnancy. *Journal fur Neurologie, Neurochirurgie und Psychiatrie*. 2009;10(1):41-47.
  178. Taylor D. Antidepressant drugs and cardiovascular pathology: A clinical overview of effectiveness and safety. *Acta psychiatrica Scandinavica*. 2008;118(6):434-442.
  179. Sterke CSV, A. P.; van Beeck, E. F.; van der Cammen, T. J. The influence of drug use on fall incidents among nursing home residents: a systematic review. *International psychogeriatrics*. 2008;20(5):890-910.
  180. O'Brien LE, T. R.; Sarkar, M.; Einarson, A.; Koren, G. Does paroxetine cause cardiac malformations? *Journal of obstetrics and gynaecology Canada : JOGC = Journal d'obstetrique et gynecologie du Canada : JOGC*. 2008;30(8):696-701.
  181. Loke YKT, A. N.; Singh, S. Meta-analysis: gastrointestinal bleeding due to interaction between selective serotonin uptake inhibitors and non-steroidal anti-inflammatory drugs. *Alimentary pharmacology & therapeutics*. 2008;27(1):31-40.
  182. Kongkaew CN, P. R.; Ashcroft, D. M. Hospital admissions associated with adverse drug reactions: A systematic review of prospective observational studies. *Annals of Pharmacotherapy*. 2008;42(7-8):1017-1025.
  183. Bond DJN, M. M.; Kauer-Sant'Anna, M.; Lam, R. W.; Yatham, L. N. Antidepressant-associated mood elevations in bipolar II disorder compared with bipolar I disorder and major depressive disorder: a systematic review and meta-analysis. *The Journal of clinical psychiatry*. 2008;69(10):1589-1601.
  184. Takkouche BM-M, A.; Gill, S. S.; Etmnan, M. Psychotropic medications and the risk of fracture: a meta-analysis. *Drug safety*. 2007;30(2):171-184.
  185. Howard RL, Avery AJ, Slavenburg S, et al. Which drugs cause preventable admissions to hospital? A systematic review. *British journal of clinical pharmacology*. 2007;63(2):136-147.
  186. Hartikainen SL, E.; Louhivuori, K. Medication as a risk factor for falls: critical systematic review. *The journals of gerontology Series A, Biological sciences and medical sciences*. 2007;62(10):1172-1181.

187. Bellantuono CM, G.; Gentile, S. Serotonin reuptake inhibitors in pregnancy and the risk of major malformations: a systematic review. *Human psychopharmacology*. 2007;22(3):121-128.
188. Bar-Oz BE, T.; Einarson, A.; Boskovic, R.; O'Brien, L.; Malm, H.; Berard, A.; Koren, G. Paroxetine and congenital malformations: meta-Analysis and consideration of potential confounding factors. *Clinical therapeutics*. 2007;29(5):918-926.
189. Swenson JRD, S.; Fergusson, D. Adverse cardiovascular events in antidepressant trials involving high-risk patients: a systematic review of randomized trials. *Canadian journal of psychiatry Revue canadienne de psychiatrie*. 2006;51(14):923-929.
190. Sala MC, F.; Cappucciati, C.; Brambilla, P.; d'Allio, G.; Caverzasi, E.; Barale, F.; De Ferrari, G. Antidepressants: Their effects on cardiac channels, QT prolongation and Torsade de Pointes. *Current Opinion in Investigational Drugs*. 2006;7(3):256-263.
191. Rahimi RN, S.; Abdollahi, M. Pregnancy outcomes following exposure to serotonin reuptake inhibitors: a meta-analysis of clinical trials. *Reproductive toxicology (Elmsford, NY)*. 2006;22(4):571-575.
192. McIntyre RSS, J. K.; Konarski, J. Z.; Kennedy, S. H. The effect of antidepressants on lipid homeostasis: a cardiac safety concern? *Expert opinion on drug safety*. 2006;5(4):523-537.
193. McClintock SMH, M. M. Association of suicide in the elderly and SSRI antidepressants: Information from a population-based study. *Aging Health*. 2006;2(6):917-918.
194. Hall WDL, J. How have the selective serotonin reuptake inhibitor antidepressants affected suicide mortality? *The Australian and New Zealand journal of psychiatry*. 2006;40(11-12):941-950.
195. Lattimore KAD, S. M.; Kaciroti, N.; Kemper, A. R.; Neal, C. R., Jr.; Vazquez, D. M. Selective serotonin reuptake inhibitor (SSRI) use during pregnancy and effects on the fetus and newborn: a meta-analysis. *Journal of perinatology : official journal of the California Perinatal Association*. 2005;25(9):595-604.
196. Gentile S. The safety of newer antidepressants in pregnancy and breastfeeding. *Drug safety*. 2005;28(2):137-152.
197. Einarson TRE, A. Newer antidepressants in pregnancy and rates of major malformations: a meta-analysis of prospective comparative studies. *Pharmacoepidemiology and drug safety*. 2005;14(12):823-827.
198. Wen SWW, M. Risk of fetal exposure to tricyclic antidepressants. *Journal of obstetrics and gynaecology Canada : JOGC = Journal d'obstetrique et gynecologie du Canada : JOGC*. 2004;26(10):887-892.
199. Weissman AML, B. T.; Hartz, A. J.; Bentler, S.; Donohue, M.; Ellingrod, V. L.; Wisner, K. L. Pooled analysis of antidepressant levels in lactating mothers, breast milk, and nursing infants. *The American journal of psychiatry*. 2004;161(6):1066-1078.
200. Ramasubbu R. Cerebrovascular effects of selective serotonin reuptake inhibitors: a systematic review. *The Journal of clinical psychiatry*. 2004;65(12):1642-1653.
201. Newman TB. A black-box warning for antidepressants in children? *The New England journal of medicine*. 2004;351(16):1595-1598.
202. McIntosh HMW, N. F.; Bagnall, A. M. Assessing harmful effects in systematic reviews. *BMC medical research methodology*. 2004;4:19.
203. Bailey BB, N. A.; Amre, D. K. A meta-analysis of prognostic indicators to predict seizures, arrhythmias or death after tricyclic antidepressant overdose. *Journal of toxicology Clinical toxicology*. 2004;42(6):877-888.
204. Weinrieb RMA, Marc; Lynch, Kevin G.; Chang, Kyong-Mi; Lewis, James D. A critical review of selective serotonin reuptake inhibitor-associated bleeding: Balancing the risk of treating Hepatitis C-infected patients. *The Journal of clinical psychiatry*. 2003;64(12):1502-1510.
205. Addis AK, G. Safety of fluoxetine during the first trimester of pregnancy: a meta-analytical review of epidemiological studies. *Psychological medicine*. 2000;30(1):89-94.
206. Thase ME. Effects of venlafaxine on blood pressure: a meta-analysis of original data from 3744 depressed patients. *The Journal of clinical psychiatry*. 1998;59(10):502-508.
207. Wilens TEB, Joseph; Baldessarini, Ross J.; Geller, Barbara; Schleifer, David; Spencer, Thomas J.; Birmaher, Boris; Goldblatt, Alan. Cardiovascular effects of therapeutic doses of tricyclic

- antidepressants in children and adolescents. *Journal of the American Academy of Child & Adolescent Psychiatry*. 1996;35(11):1491-1501.
1. Ng QXV, N.; Ho, C. Y. X.; Sim, W. S.; Lim, D. Y.; Yeo, W. S. Selective Serotonin Reuptake Inhibitors and Persistent Pulmonary Hypertension of the Newborn: An Update Meta-Analysis. *Journal of women's health (2002)*. 2019;28(3):331-338.
  2. Patel KRI, S.; Singam, V.; Rastogi, S.; Silverberg, J. I. Association between atopic dermatitis, depression, and suicidal ideation: A systematic review and meta-analysis. *Journal of the American Academy of Dermatology*. 2019;80(2):402-410.
  3. Rexwinkel RZ, J.; van Etten-Jamaludin, F. S.; Benninga, M. A.; Tabbers, M. M. Side effects associated with pharmacotherapy for pediatric irritable bowel syndrome and functional abdominal pain - not otherwise specified: a systematic review. *Expert opinion on drug safety*. 2019;18(2):111-125.
  4. Perlman KB, D.; Israel, S.; Rollins, C.; Brown, E.; Tunteng, J. F.; You, R.; You, E.; Tanguay-Sela, M.; Snook, E.; Miresco, M.; Berlim, M. T. A systematic meta-review of predictors of antidepressant treatment outcome in major depressive disorder. *Journal of affective disorders*. 2019;243:503-515.
  5. Amare ATS, K. O.; Tekola-Ayele, F.; Hsu, Y. H.;. The association of obesity and coronary artery disease genes with response to SSRIs treatment in major depression. *Journal of neural transmission (Vienna, Austria : 1996)*. 2019;126(1):35-45.
  6. Aguiar JPB, A. M.; Martins, A. P.; Leufkens, H. G. M.; Alves da Costa, F. Potentially inappropriate medications with risk of cardiovascular adverse events in the elderly: A systematic review of tools addressing inappropriate prescribing. *Journal of clinical pharmacy and therapeutics*. 2019.
  7. Zhou C, Fang L, Chen Y, Zhong J, Wang H, Xie P. Effect of selective serotonin reuptake inhibitors on bone mineral density: a systematic review and meta-analysis. *Osteoporosis international : a journal established as result of cooperation between the European Foundation for Osteoporosis and the National Osteoporosis Foundation of the USA*. 2018;29(6):1243-1251.
  8. Wu QL, B.; Tonmoy, S. Depression and risk of fracture and bone loss: an updated meta-analysis of prospective studies. *Osteoporosis international : a journal established as result of cooperation between the European Foundation for Osteoporosis and the National Osteoporosis Foundation of the USA*. 2018.
  9. Wang SMH, C.; Bahk, W. M.; Lee, S. J.; Patkar, A. A.; Masand, P. S.; Pae, C. U. Addressing the Side Effects of Contemporary Antidepressant Drugs: A Comprehensive Review. *Chonnam medical journal*. 2018;54(2):101-112.
  10. Visco DBM-d-C, R.; Chaves, W. F.; Lacerda, D. C.; Pereira, S. D. C.; Ferraz-Pereira, K. N.; Toscano, A. E. Selective serotonin reuptake inhibitors affect structure, function and metabolism of skeletal muscle: A systematic review. *Pharmacological research*. 2018;136:194-204.
  11. Uguz F. Maternal antidepressant use during pregnancy and the risk of attention-deficit/hyperactivity disorder in children: A systematic review of the current literature. *Journal of clinical psychopharmacology*. 2018;38(3):254-259.
  12. Tan ECKL, D.; Sandborgh-Englund, G.; Haasum, Y.; Johnell, K. Medications That Cause Dry Mouth As an Adverse Effect in Older People: A Systematic Review and Metaanalysis. *Journal of the American Geriatrics Society*. 2018;66(1):76-84.
  13. Telang SW, C.; Olten, B.; Bloch, M. H. Meta-analysis: Second generation antidepressants and headache. *Journal of affective disorders*. 2018;236:60-68.
  14. Sepehrpour AHE, M.; Jiskani, A.; Casula, R.; Athanasiou, T. Selective serotonin reuptake inhibitor use and outcomes following cardiac surgery-a systematic review. *Journal of thoracic disease*. 2018;10(2):1112-1120.
  15. Prady SLH, I.; Fraser, L. K.; Mikocka-Walus, A. A systematic review of maternal antidepressant use in pregnancy and short- and long-term offspring's outcomes. *Archives of women's mental health*. 2018;21(2):127-140.

16. Cappetta KB, C.; Johnson, J. A.; Bloch, M. H. Meta-analysis: Risk of dry mouth with second generation antidepressants. *Progress in neuro-psychopharmacology & biological psychiatry*. 2018;84(Pt A):282-293.
17. Steinert TF, W. Epileptic Seizures Under Antidepressive Drug Treatment: Systematic Review. *Pharmacopsychiatry*. 2018;51(4):121-135.
18. Melo GD, K. L.; Rodrigues Filho, R.; Ortega, A. O. L.; Porporatti, A. L.; Dick, B.; Flores-Mir, C.; De Luca Canto, G. Association between psychotropic medications and presence of sleep bruxism: A systematic review. *Journal of oral rehabilitation*. 2018;45(7):545-554.
19. Moncrieff J. What does the latest meta-analysis really tell us about antidepressants? *Epidemiology and psychiatric sciences*. 2018;27(5):430-432.
20. Douros AA, M.; Renoux, C. Risk of Intracranial Hemorrhage Associated with the Use of Antidepressants Inhibiting Serotonin Reuptake: A Systematic Review. *CNS drugs*. 2018;32(4):321-334.
21. Chen LWC, M. Y.; Lian, Z. P.; Lin, H. S.; Chien, C. C.; Yin, H. L.; Chu, Y. H.; Chen, K. Y. Amitriptyline and Sexual Function: A Systematic Review Updated for Sexual Health Practice. *American journal of men's health*. 2018;12(2):370-379.
22. Comoretto RIR, F.; Lucenteforte, E.; Mugelli, A.; Trifiro, G.; Cascini, S.; Roberto, G.; Chinellato, A.; Filippelli, A.; Corrao, G. Bleeding events attributable to concurrent use of warfarin and other medications in high-risk elderly: meta-analysis and Italian population-based investigation. *European journal of clinical pharmacology*. 2018.
23. Varney AW, K.; Agius, M. What are the risks associated with the use of NSAIDs as an adjunct to SSRIs for treatment of depression? An evaluation of current evidence. *Psychiatra Danubina*. 2017;29(Suppl 3):375-382.
24. Uguz F. Is There Any Association Between Use of Antidepressants and Preeclampsia or Gestational Hypertension?: A Systematic Review of Current Studies. *Journal of clinical psychopharmacology*. 2017;37(1):72-77.
25. Salvi VG, I.; Cerveri, G.; Mencacci, C.; Barone-Adesi, F. The risk of new-onset diabetes in antidepressant users - A systematic review and meta-analysis. *PloS one*. 2017;12(7):e0182088.
26. Stubbs CM, L.; Crawford, S. A.; Wickersham, E. A.; Brockhaus, J. L.; McCarthy, L. H. Do SSRIs and SNRIs reduce the frequency and/or severity of hot flashes in menopausal women. *The Journal of the Oklahoma State Medical Association*. 2017;110(5):272-274.
27. Riediger CS, T.; Barlinn, K.; Maier, S.; Weitz, J.; Siepmann, T. Adverse Effects of Antidepressants for Chronic Pain: A Systematic Review and Meta-analysis. *Frontiers in neurology*. 2017;8:307.
28. Querido AL. Diving and antidepressants. *Diving Hyperb Med*. 2017;47(4):253-256.
29. Mezzacappa AL, P. A.; Gianfagna, F.; Cazas, O.; Hardy, P.; Falissard, B.; Sutter-Dallay, A. L.; Gressier, F. Risk for Autism Spectrum Disorders According to Period of Prenatal Antidepressant Exposure: A Systematic Review and Meta-analysis. *JAMA pediatrics*. 2017;171(6):555-563.
30. Maund EG, L. S.; Gøtzsche, P. C. Considering benefits and harms of duloxetine for treatment of stress urinary incontinence: A meta-analysis of clinical study reports. *CMAJ : Canadian Medical Association journal = journal de l'Association medicale canadienne*. 2017;189(5):E194-E203.
31. Moraros JN, C.; Patten, S. B.; Mousseau, D. D. The association of antidepressant drug usage with cognitive impairment or dementia, including Alzheimer disease: A systematic review and meta-analysis. *Depression and anxiety*. 2017;34(3):217-226.
32. Locher CK, H.; Zion, S. R.; Werner, C.; Pine, D. S.; Kirsch, I.; Kessler, R. C.; Kossowsky, J. Efficacy and Safety of Selective Serotonin Reuptake Inhibitors, Serotonin-Norepinephrine Reuptake Inhibitors, and Placebo for Common Psychiatric Disorders Among Children and Adolescents: A Systematic Review and Meta-analysis. *JAMA psychiatry*. 2017;74(10):1011-1020.
33. Laux GB, B.; Hajak, G.; Lemke, M.; Volz, H. P. Pooled Analysis of Four Non-Interventional Studies: Effectiveness and Tolerability of the Antidepressant Agomelatine in Daily Practice. *Advances in therapy*. 2017;34(4):895-914.

34. Kaplan YCK-A, E.; Acar, S.; Sozmen, K. Maternal SSRI discontinuation, use, psychiatric disorder and the risk of autism in children: a meta-analysis of cohort studies. *British journal of clinical pharmacology*. 2017;83(12):2798-2806.
35. Heller HMR, A. C. J.; Bruning, A. H. L.; de Groot, C. J. M.; Scheele, F.; van Pampus, M. G.; Honig, A. Increased postpartum haemorrhage, the possible relation with serotonergic and other psychopharmacological drugs: a matched cohort study. *BMC pregnancy and childbirth*. 2017;17(1):166.
36. Hill LLL, V. L.; Winbrock, E. L.; Li, G.; Chihuri, S.; Lee, K. C. Depression, antidepressants and driving safety. *Injury epidemiology*. 2017;4(1):10.
37. Deidda AP, C.; Micheletto, L.; Bocchetta, A.; Del Zompo, M.; Stochino, M. E. Interstitial lung disease induced by fluoxetine: Systematic review of literature and analysis of Vigibase, Eudravigilance and a national pharmacovigilance database. *Pharmacological research*. 2017;120:294-301.
38. Brunnauer AL, G. Driving Under the Influence of Antidepressants: A Systematic Review and Update of the Evidence of Experimental and Controlled Clinical Studies. *Pharmacopsychiatry*. 2017;50(5):173-181.
39. Brown HKH-S, N.; Lunskey, Y.; Dennis, C. E.; Vigod, S. N. The Association Between Antenatal Exposure to Selective Serotonin Reuptake Inhibitors and Autism: A Systematic Review and Meta-Analysis. *The Journal of clinical psychiatry*. 2017;78(1):e48-e58.
40. Beyer CC, K.; Johnson, J. A.; Bloch, M. H. Meta-analysis: Risk of hyperhidrosis with second-generation antidepressants. *Depression and anxiety*. 2017;34(12):1134-1146.
41. Andrade C. Antidepressant Exposure During Pregnancy and Risk of Autism in the Offspring, 1: Meta-Review of Meta-Analyses. *The Journal of clinical psychiatry*. 2017;78(8):e1047-e1051.
42. Allain NL, C.; Falissard, B.; Allain, J. S.; Batail, J. M.; Polard, E.; Montastruc, F.; Drapier, D.; Naudet, F. Manic switches induced by antidepressants: an umbrella review comparing randomized controlled trials and observational studies. *Acta psychiatrica Scandinavica*. 2017;135(2):106-116.
43. Vlachos KG, S.; Efremidis, M.; Sideris, A.; Letsas, K. P. An update on risk factors for drug-induced arrhythmias. *Expert review of clinical pharmacology*. 2016;9(1):117-127.
44. Werneke UJ, F.; Taylor, D. M.; Ott, M. Conundrums in neurology: diagnosing serotonin syndrome - a meta-analysis of cases. *BMC neurology*. 2016;16:97.
45. Warden SJF, R. K. Do Selective Serotonin Reuptake Inhibitors (SSRIs) Cause Fractures? *Current osteoporosis reports*. 2016;14(5):211-218.
46. Torjesen I. SSRIs double the risk of suicide and violence in healthy adults. *BMJ (Online)*. 2016;355.
47. Stone M. Suicidality and aggression during antidepressant treatment: Authors misinterpreted earlier paper from the FDA. *BMJ (Online)*. 2016;352.
48. Smit MD, K. M.; Honig, A. Mirtazapine in pregnancy and lactation - A systematic review. *European neuropsychopharmacology : the journal of the European College of Neuropsychopharmacology*. 2016;26(1):126-135.
49. Simonsen ALD, P. B.; Gotzsche, P. C. Persistent sexual dysfunction after early exposure to SSRIs: Systematic review of animal studies. *The International journal of risk & safety in medicine*. 2016;28(1):1-12.
50. Sharma TG, L. S.; Freund, N.; Gotzsche, P. C. Suicidality and aggression during antidepressant treatment: systematic review and meta-analyses based on clinical study reports. *BMJ (Clinical research ed)*. 2016;352:i65.
51. Selmer RH, B.; Furu, K.; Andersen, M.; Norgaard, M.; Zoega, H.; Kieler, H. Individual-based versus aggregate meta-analysis in multi-database studies of pregnancy outcomes: the Nordic example of selective serotonin reuptake inhibitors and venlafaxine in pregnancy. *Pharmacoepidemiology and drug safety*. 2016;25(10):1160-1169.
52. Rudisill TMZ, M.; Kelley, G. A.; Pilkerton, C.; Rudisill, B. R. Medication use and the risk of motor vehicle collisions among licensed drivers: A systematic review. *Accident; analysis and prevention*. 2016;96:255-270.

53. Pozzi MR, S.; Clementi, E.; Molteni, M.; Nobile, M. Antidepressants and, suicide and self-injury: Causal or casual association? *International journal of psychiatry in clinical practice*. 2016;20(1):47-51.
54. Potočnjak ID, V.; Vukičević Baudoin, D.; Čulig, J.; Jakovljević, M. Cardiovascular side effects of psychopharmacologic therapy. *International journal of cardiology*. 2016;219:367-372.
55. Muzik MH, S. E. Use of Antidepressants During Pregnancy?: What to Consider when Weighing Treatment with Antidepressants Against Untreated Depression. *Maternal and child health journal*. 2016;20(11):2268-2279.
56. Lassen D, Ennis ZN, Damkier P. First-Trimester Pregnancy Exposure to Venlafaxine or Duloxetine and Risk of Major Congenital Malformations: A Systematic Review. *Basic & clinical pharmacology & toxicology*. 2016;118(1):32-36.
57. Kaplan YC, Keskin-Arslan E, Acar S, Sozmen K. Prenatal selective serotonin reuptake inhibitor use and the risk of autism spectrum disorder in children: A systematic review and meta-analysis. *Reproductive toxicology (Elmsford, NY)*. 2016;66:31-43.
58. Kobayashi T, Matsuyama T, Takeuchi M, Ito S. Autism spectrum disorder and prenatal exposure to selective serotonin reuptake inhibitors: A systematic review and meta-analysis. *Reproductive toxicology (Elmsford, NY)*. 2016;65:170-178.
59. Jordan SM, J. K.; Davies, G. I.; Tucker, D.; Thayer, D. S.; Luteijn, J. M.; Morgan, M.; Garne, E.; Hansen, A. V.; Klungsoyr, K.; Engeland, A.; Boyle, B.; Dolk, H. Selective Serotonin Reuptake Inhibitor (SSRI) Antidepressants in Pregnancy and Congenital Anomalies: Analysis of Linked Databases in Wales, Norway and Funen, Denmark. *PLoS one*. 2016;11(12):e0165122.
60. Jarde AM, M.; Kingston, D.; Giallo, R.; MacQueen, G. M.; Giglia, L.; Beyene, J.; Wang, Y.; McDonald, S. D. Neonatal Outcomes in Women With Untreated Antenatal Depression Compared With Women Without Depression: A Systematic Review and Meta-analysis. *JAMA psychiatry*. 2016;73(8):826-837.
61. Howland RH. Antidepressant Drugs and the Risk of Intracranial Bleeding: Parsing an Observational Study. *Journal of psychosocial nursing and mental health services*. 2016;54(2):21-24.
62. Galling BR, A.; Nielsen, R. E.; Nielsen, J.; Gerhard, T.; Carbon, M.; Stubbs, B.; Vancampfort, D.; De Hert, M.; Olfson, M.; Kahl, K. G.; Martin, A.; Guo, J. J.; Lane, H. Y.; Sung, F. C.; Liao, C. H.; Arango, C.; Correll, C. U. Type 2 Diabetes Mellitus in Youth Exposed to Antipsychotics: A Systematic Review and Meta-analysis. *JAMA psychiatry*. 2016;73(3):247-259.
63. Donneyong MMB, K.; Bosco-Levy, P.; Dong, Y. H.; Levin, R.; Gagne, J. J. Risk of mortality with concomitant use of tamoxifen and selective serotonin reuptake inhibitors: multi-database cohort study. *BMJ (Clinical research ed)*. 2016;354:i5014.
64. Cameron DHR, M. J. Antidepressants and Driving in Older Adults: A Systematic Review. *Canadian journal on aging = La revue canadienne du vieillissement*. 2016;35 Suppl 1:7-14.
65. Braun CB, T.; Franklin, J.; Baethge, C. Suicides and Suicide Attempts during Long-Term Treatment with Antidepressants: A Meta-Analysis of 29 Placebo-Controlled Studies Including 6,934 Patients with Major Depressive Disorder. *Psychotherapy and psychosomatics*. 2016;85(3):171-179.
66. Bielefeldt AOD, P. B.; Gotzsche, P. C. Precursors to suicidality and violence on antidepressants: systematic review of trials in adult healthy volunteers. *Journal of the Royal Society of Medicine*. 2016;109(10):381-392.
67. Barth MK, L.; Klostermann, S.; Barbui, C.; Cipriani, A.; Linde, K. Efficacy of selective serotonin reuptake inhibitors and adverse events: meta-regression and mediation analysis of placebo-controlled trials. *The British journal of psychiatry : the journal of mental science*. 2016;208(2):114-119.
68. Akioyamen LEM, H.; Holloway, A. C.; Taylor, V. H.; Akioyamen, N. O.; Sherifali, D. Effects of depression pharmacotherapy in fertility treatment on conception, birth, and neonatal health: A systematic review. *Journal of psychosomatic research*. 2016;84:69-80.
69. Alvares GAQ, D. S.; Hickie, I. B.; Guastella, A. J. Autonomic nervous system dysfunction in psychiatric disorders and the impact of psychotropic medications: a systematic review and meta-analysis. *Journal of psychiatry & neuroscience : JPN*. 2016;41(2):89-104.

70. Wang SY, L.; Wang, L.; Gao, L.; Xu, B.; Xiong, Y. Selective Serotonin Reuptake Inhibitors (SSRIs) and the Risk of Congenital Heart Defects: A Meta-Analysis of Prospective Cohort Studies. *Journal of the American Heart Association*. 2015;4(5).
71. Uchida MS, Andrea E.; Biederman, Joseph; Castro, Victor M.; Kenworthy, Tara; Chan, James; Rosales, Ana M.; Newton-Cheh, Christopher; Perlis, Roy H. A systematic evaluation of the QTc interval and antidepressants in youth: An electronic health record study. *Journal of Developmental and Behavioral Pediatrics*. 2015;36(6):434-439.
72. Thase MEF, R.; Cheng, R. F.; Guico-Pabia, C. J.; Sporn, J.; Boucher, M.; Tourian, K. A. Effects of desvenlafaxine on blood pressure in patients treated for major depressive disorder: a pooled analysis. *Current medical research and opinion*. 2015;31(4):809-820.
73. Teo IS, C. T. Assessing the Risks Associated with Antidepressant Use in Plastic Surgery: A Systematic Review. *Plastic and reconstructive surgery*. 2015;136(5):1107-1119.
74. Tampi RRB, M.; Carter, K. V.; Tampi, D. J.; Moca, M.; Knudsen, A.; May, J. Citalopram, QTc Prolongation, and Torsades de Pointes. *Psychosomatics*. 2015;56(1):36-43.
75. Stubbs B. A meta-analysis investigating falls in older adults taking selective serotonin reuptake inhibitors confirms an association but by no means implies causation. *The American Journal of Geriatric Psychiatry*. 2015;23(10):1098-1098.
76. Santarsieri DS, T. L. Antidepressant efficacy and side-effect burden: A quick guide for clinicians. *Drugs in Context*. 2015;4.
77. Robinson GE. Controversies about the use of antidepressants in pregnancy: Response to Dr. Casper, Dr. Osborne, and Dr. Payne. *Journal of Nervous and Mental Disease*. 2015;203(6):480-480.
78. Renoux CL, L. M.; Patenaude, V.; Bresee, L. C.; Paterson, J. M.; Lafrance, J. P.; Tamim, H.; Mahmud, S. M.; Alsabbagh, M. W.; Hemmelgarn, B.; Dormuth, C. R.; Ernst, P. Serotonin-Norepinephrine Reuptake Inhibitors and the Risk of AKI: A Cohort Study of Eight Administrative Databases and Meta-Analysis. *Clinical journal of the American Society of Nephrology : CJASN*. 2015;10(10):1716-1722.
79. Pinheiro EB, Debra L.; Hoxha, Denada; Ciolino, Jody D.; Wisner, Katherine L. Sertraline and breastfeeding: Review and meta-analysis. *Archives of women's mental health*. 2015;18(2):139-146.
80. Orsolini LB, C. Serotonin reuptake inhibitors and breastfeeding: a systematic review. *Human psychopharmacology*. 2015;30(1):4-20.
81. Olfson MG, T. Re-examining antidepressant risk of self-injury in children and adolescents. *Pharmacoepidemiology and drug safety*. 2015;24(2):215-217.
82. Nezafati MHV, M.; Nezafati, P. Antidepressants and cardiovascular adverse events: A narrative review. *ARYA atherosclerosis*. 2015;11(5):295-304.
83. Mohler JF, M.; Chen, Z.; Lee, J. K.; Thienhaus, O. J. Depression, antidepressants, and bone health in older adults: a systematic review. *Journal of the American Geriatrics Society*. 2015;63(3):623-624.
84. Man KKT, H. H.; Wong, L. Y.; Chan, E. W.; Simonoff, E.; Wong, I. C. Exposure to selective serotonin reuptake inhibitors during pregnancy and risk of autism spectrum disorder in children: a systematic review and meta-analysis of observational studies. *Neuroscience and biobehavioral reviews*. 2015;49:82-89.
85. KoKoAung E, Cavenett S, McArthur A, Aromataris E. The association between suicidality and treatment with selective serotonin reuptake inhibitors in older people with major depression: a systematic review. *JBI database of systematic reviews and implementation reports*. 2015;13(3):174-205.
86. Gøtzsche PCY, A. H.; Crace, J. Does long term use of psychiatric drugs cause more harm than good? *BMJ (Online)*. 2015;350.
87. Gentile S. Prenatal antidepressant exposure and the risk of autism spectrum disorders in children. Are we looking at the fall of Gods? *Journal of affective disorders*. 2015;182:132-137.
88. Gentile S. Early pregnancy exposure to selective serotonin reuptake inhibitors, risks of major structural malformations, and hypothesized teratogenic mechanisms. *Expert opinion on drug metabolism & toxicology*. 2015;11(10):1585-1597.

89. Gebara MAL, K. L.; Karp, J. F.; Nash, M. C.; Iaboni, A.; Lenze, E. J. Cause or Effect? Selective Serotonin Reuptake Inhibitors and Falls in Older Adults: A Systematic Review. *The American journal of geriatric psychiatry : official journal of the American Association for Geriatric Psychiatry*. 2015;23(10):1016-1028.
90. Ennis ZND, P. Pregnancy exposure to olanzapine, quetiapine, risperidone, aripiprazole and risk of congenital malformations. A systematic review. *Basic & clinical pharmacology & toxicology*. 2015;116(4):315-320.
91. Davis JMR, C. E. Do antipsychotics cause hip fractures? Promise and pitfalls of big data. *Journal of Clinical Psychiatry*. 2015;76(9):e1155-e1156.
92. Correll CUD, J.; De Lepeleire, J.; De Hert, M. Effects of antipsychotics, antidepressants and mood stabilizers on risk for physical diseases in people with schizophrenia, depression and bipolar disorder. *World psychiatry : official journal of the World Psychiatric Association (WPA)*. 2015;14(2):119-136.
93. Bruning AHH, H. M.; Kieviet, N.; Bakker, P. C.; de Groot, C. J.; Dolman, K. M.; Honig, A. Antidepressants during pregnancy and postpartum hemorrhage: a systematic review. *European journal of obstetrics, gynecology, and reproductive biology*. 2015;189:38-47.
94. Stevenson JMW, J. L.; Burnham, T. G.; Prevost, A. T.; Schiff, R.; Erskine, S. D.; Davies, J. G. Predicting adverse drug reactions in older adults; A systematic review of the risk prediction models. *Clinical Interventions in Aging*. 2014;9:1581-1593.
95. Ross LEG, Sophie. Selected pregnancy and delivery outcomes after exposure to antidepressant medication. *JAMA psychiatry*. 2014;71(6):716-717.
96. Rais TBR, Alexandra. Association between antidepressants use during pregnancy and autistic spectrum disorders: A meta-analysis. *Innovations in clinical neuroscience*. 2014;11(5-6):18-22.
97. Park HS, H.; Miki, A.; Urushihara, H.; Sawada, Y. Medications associated with falls in older people: systematic review of publications from a recent 5-year period. *European journal of clinical pharmacology*. 2015;71(12):1429-1440.
98. Prieto-Alhambra DP, H.; Goldenberg, J. S.; Khong, T. P.; Klungel, O. H.; Robinson, N. J.; de Vries, F. Excess risk of hip fractures attributable to the use of antidepressants in five European countries and the USA. *Osteoporosis international : a journal established as result of cooperation between the European Foundation for Osteoporosis and the National Osteoporosis Foundation of the USA*. 2014;25(3):847-855.
99. Previti GP, S.; Chowdhury, S.; Aguglia, E.; Pariante, C. M. Neurodevelopmental outcome for offspring of women treated for antenatal depression: a systematic review. *Archives of women's mental health*. 2014;17(6):471-483.
100. Pereira AC, Y.; Gitlin, M. J.; Dworkin, R. H. Suicidal ideation and behavior associated with antidepressant medications: Implications for the treatment of chronic pain. *Pain*. 2014;155(12):2471-2475.
101. Pedersen LH. Meta-analysis: antidepressant exposure during pregnancy is associated with poor neonatal adaptation. *Evidence-based medicine*. 2014;19(2):76.
102. Paumgartten FJ. Developmental risks associated with use of psychoactive drugs during pregnancy are largely unknown. *Revista Brasileira de Psiquiatria*. 2014;36(4):359.
103. Okazaki R. [Fracture risk associated with drugs other than glucocorticoids]. *Clinical calcium*. 2014;24(3):357-365.
104. Oka YO, K.; Kawashita, N.; Shirakuni, Y.; Takagi, T. Meta-analysis of the risk of upper gastrointestinal hemorrhage with combination therapy of selective serotonin reuptake inhibitors and non-steroidal anti-inflammatory drugs. *Biological & pharmaceutical bulletin*. 2014;37(6):947-953.
105. McDonagh MSM, A.; Phillipi, C.; Romm, J.; Peterson, K.; Thakurta, S.; Guise, J. M. Depression drug treatment outcomes in pregnancy and the postpartum period: a systematic review and meta-analysis. *Obstetrics and gynecology*. 2014;124(3):526-534.
106. Mahdanian AAR, S.; Bacon, S. L.; Ozdin, D.; Lavoie, K. L.; Looper, K. Serotonergic antidepressants and perioperative bleeding risk: a systematic review. *Expert opinion on drug safety*. 2014;13(6):695-704.



107. Mago RT, N.; Andrade, C. Cardiovascular adverse effects of newer antidepressants. *Expert review of neurotherapeutics*. 2014;14(5):539-551.
108. Lorenzo LE, A. Antidepressant use in pregnancy: an evaluation of adverse outcomes excluding malformation. *The Israel journal of psychiatry and related sciences*. 2014;51(2):94-104.
109. Li WL, W.; Wan, Y.; Ren, J.; Li, T.; Li, C. Appraisal of the methodological quality and summary of the findings of systematic reviews on the relationship between SSRIs and suicidality. *Shanghai archives of psychiatry*. 2014;26(5):248-258.
110. Isacsson GR, C. L. Antidepressant drugs and the risk of suicide in children and adolescents. *Paediatric drugs*. 2014;16(2):115-122.
111. Grigoriadis S. The effects of antidepressant medications on mothers and babies. *Journal of population therapeutics and clinical pharmacology = Journal de la therapeutique des populations et de la pharmacologie clinique*. 2014;21(3):e533-541.
112. Gebara MAS, M. L.; Lipsey, K. L.; Teitelbaum, S. L.; Civitelli, R.; Muller, D. J.; Reynolds, C. F., 3rd; Mulsant, B. H.; Lenze, E. J. Depression, antidepressants, and bone health in older adults: a systematic review. *Journal of the American Geriatrics Society*. 2014;62(8):1434-1441.
113. Fanoie SK, D.; Fink-Jensen, A.; Jensen, H. K.; Toft, E.; Nielsen, J.; Videbech, P.; Pehrson, S.; Bundgaard, H. Risk of arrhythmia induced by psychotropic medications: A proposal for clinical management. *European Heart Journal*. 2014;35(20):1306-1315b.
114. El Marroun HW, T.; Verhulst, F. C.; Tiemeier, H. Maternal use of antidepressant or anxiolytic medication during pregnancy and childhood neurodevelopmental outcomes: a systematic review. *European child & adolescent psychiatry*. 2014;23(10):973-992.
115. Costoloni GP, E.; Goracci, A.; Bolognesi, S.; Fagiolini, A. [Mood stabilisers and pregnancy outcomes - a review]. *Psychiatria polska*. 2014;48(5):865-887.
116. Clayton AHC, H. A.; Handiwala, L. Antidepressants and sexual dysfunction: Mechanisms and clinical implications. *Postgraduate medicine*. 2014;126(2):91-99.
117. Beach SRK, W. J.; Celano, C. M.; Januzzi, J. L.; Ruskin, J. N.; Noseworthy, P. A.; Huffman, J. C. Meta-analysis of selective serotonin reuptake inhibitor-associated QTc prolongation. *The Journal of clinical psychiatry*. 2014;75(5):e441-449.
118. Anglin RY, Y.; Moayyedi, P.; Tse, F.; Armstrong, D.; Leontiadis, G. I. Risk of upper gastrointestinal bleeding with selective serotonin reuptake inhibitors with or without concurrent nonsteroidal anti-inflammatory use: a systematic review and meta-analysis. *The American journal of gastroenterology*. 2014;109(6):811-819.
119. Andrade C. Antidepressants and testicular cancer: cause versus association. *The Journal of clinical psychiatry*. 2014;75(3):e198-200.
120. Rotella FM, E. Depression as a risk factor for diabetes: a meta-analysis of longitudinal studies. *The Journal of clinical psychiatry*. 2013;74(1):31-37.
121. Rabenda VN, D.; Beaudart, C.; Bruyere, O.; Reginster, J. Y. Relationship between use of antidepressants and risk of fractures: a meta-analysis. *Osteoporosis international : a journal established as result of cooperation between the European Foundation for Osteoporosis and the National Osteoporosis Foundation of the USA*. 2013;24(1):121-137.
122. Painuly NP, Ritu; Heun, Reinhard; Sharan, Pratap. Risk of cardiovascular malformations after exposure to paroxetine in pregnancy: Meta-analysis. *The Psychiatrist*. 2013;37(6):198-203.
123. Nassir Ghaemi SV, P. A.; Whitham, E. A. Antidepressants from a public health perspective: Re-examining effectiveness, suicide, and carcinogenicity. *Acta psychiatrica Scandinavica*. 2013;127(2):89-93.
124. Myles NN, H.; Ward, H.; Large, M. Systematic meta-analysis of individual selective serotonin reuptake inhibitor medications and congenital malformations. *The Australian and New Zealand journal of psychiatry*. 2013;47(11):1002-1012.
125. Mintzes B. A leap of faith in antidepressant treatment? *JAMA psychiatry*. 2013;70(12):1-1.
126. Kennedy D. Choosing an SSRI in pregnancy: Clinical context versus statistical significance. *Australian and New Zealand Journal of Psychiatry*. 2013;47(12):1101-1103.
127. Howland RH. Antidepressant medication and pregnancy: time for randomized controlled trials. *J Psychosoc Nurs Ment Health Serv*. 2013;51(2):11-14.

128. Grigoriadis SV, E. H.; Mamisashvili, L.; Roerecke, M.; Rehm, J.; Dennis, C. L.; Koren, G.; Steiner, M.; Mousmanis, P.; Cheung, A.; Ross, L. E. Antidepressant exposure during pregnancy and congenital malformations: is there an association? A systematic review and meta-analysis of the best evidence. *The Journal of clinical psychiatry*. 2013;74(4):e293-308.
129. Grigoriadis SM, L.; Ross, L. E. Achieving the balance: treating depressed pregnant women with antidepressants. *The Journal of clinical psychiatry*. 2013;74(4):375-376.
130. Gahr MS-L, C.; Kölle, M. A.; Freudenmann, R. W. Intoxications with the monoamine oxidase inhibitor tranylcypromine: An analysis of fatal and non-fatal events. *European Neuropsychopharmacology*. 2013;23(11):1364-1372.
131. de Jong MRVDE, M.; Hartholt, K. A. Drug-related falls in older patients: Implicated drugs, consequences, and possible prevention strategies. *Therapeutic Advances in Drug Safety*. 2013;4(4):147-154.
132. de Groot MHvC, J. P.; Moek, M. A.; Tulner, L. R.; Beijnen, J. H.; Lamoth, C. J. The effects of fall-risk-increasing drugs on postural control: a literature review. *Drugs & aging*. 2013;30(11):901-920.
133. Brunbauer AL, G. The effects of most commonly prescribed second generation antidepressants on driving ability: A systematic review: 70th Birthday Prof. Riederer. *Journal of Neural Transmission*. 2013;120(1):225-232.
134. Bhattacharjee SB, R.; Kelley, G. A.; Sambamoorthi, U. Antidepressant use and new-onset diabetes: a systematic review and meta-analysis. *Diabetes/metabolism research and reviews*. 2013;29(4):273-284.
135. Barnard KP, R. C.; Holt, R. I. Antidepressant medication as a risk factor for type 2 diabetes and impaired glucose regulation: systematic review. *Diabetes care*. 2013;36(10):3337-3345.
136. Al-Zoairy RR, C.; Tschoner, A.; Kaser, S.; Ebenbichler, C. The effects of psychotropic drugs on the regulation of glucose metabolism. *Current diabetes reviews*. 2013;9(5):362-370.
137. Wu QB, A. F.; Hentz, J. G.; Crowell, M. D. Selective serotonin reuptake inhibitor treatment and risk of fractures: a meta-analysis of cohort and case-control studies. *Osteoporosis international : a journal established as result of cooperation between the European Foundation for Osteoporosis and the National Osteoporosis Foundation of the USA*. 2012;23(1):365-375.
138. de Jong GWE, T.; Koren, G.; Einarson, A. Antidepressant use in pregnancy and persistent pulmonary hypertension of the newborn (PPHN): a systematic review. *Reproductive toxicology (Elmsford, NY)*. 2012;34(3):293-297.
139. Sansone RAS, L. A. SSRIs: bad to the bone? *Innovations in clinical neuroscience*. 2012;9(7-8):42-47.
140. Pan AS, Q.; Okereke, O. I.; Rexrode, K. M.; Rubin, R. R.; Lucas, M.; Willett, W. C.; Manson, J. E.; Hu, F. B. Use of antidepressant medication and risk of type 2 diabetes: results from three cohorts of US adults. *Diabetologia*. 2012;55(1):63-72.
141. Oyebo FR, A.; Berrisford, G.; Coccia, F. Psychotropics in pregnancy: safety and other considerations. *Pharmacology & therapeutics*. 2012;135(1):71-77.
142. Nischal AT, A.; Nischal, A.; Trivedi, J. K. Suicide and antidepressants: What current evidence indicates. *Mens sana monographs*. 2012;10(1):33-44.
143. Malm H. Prenatal exposure to selective serotonin reuptake inhibitors and infant outcome. *Therapeutic drug monitoring*. 2012;34(6):607-614.
144. Lopez-Yarto MR-M, E.; Holloway, A. C.; Taylor, V. H.; McDonald, S. D. Do psychiatric medications, especially antidepressants, adversely impact maternal metabolic outcomes? *Journal of affective disorders*. 2012;141(2-3):120-129.
145. Kucukaycan MVDE, F.; Moreels, T.; Sabbe, B. G. [Antidepressants and the risk of bleeding]. *Tijdschrift voor psychiatrie*. 2012;54(3):225-234.
146. KoKoAung EA, E. The association between suicidality and treatment with selective serotonin reuptake inhibitors in older people with major depression: A systematic review. *JBI library of systematic reviews*. 2012;10(56 SUPPL):S313-S324.
147. Hennings JMS, L.; Fulda, S. Glucose metabolism and antidepressant medication. *Current pharmaceutical design*. 2012;18(32):5900-5919.

148. Hackam DGM, M. Selective serotonin reuptake inhibitors and brain hemorrhage: a meta-analysis. *Neurology*. 2012;79(18):1862-1865.
149. Grzeskowiak LEG, A. L.; Morrison, J. L. Exposed or not exposed? Exploring exposure classification in studies using administrative data to investigate outcomes following medication use during pregnancy. *European journal of clinical pharmacology*. 2012;68(5):459-467.
150. Einarson A. Publishing statistically significant results with questionable clinical importance: focus on antidepressant use in pregnancy. *The Journal of clinical psychiatry*. 2012;73(11):1443-1446.
151. Eom CS, Lee HK, Ye S, Park SM, Cho KH. Use of selective serotonin reuptake inhibitors and risk of fracture: a systematic review and meta-analysis. *J Bone Miner Res*. 2012;27(5):1186-1195.
152. Colotto MV, F.; Vo Hong, N.; Raimo, O.; Castello, A.; Carnovale, A.; Paciaroni, A.; Coletta, P. [Effect of treatment with selective serotonin reuptake inhibitors on lipid profile: state of the art]. *La Clinica terapeutica*. 2012;163(1):e41-45.
153. Bromley RLW, A.; Makarova, D.; Tower, C.; Wood, A.; Clayton-Smith, J. Fetal effects of selective serotonin reuptake inhibitor treatment during pregnancy: Immediate and longer term child outcomes. *Fetal and Maternal Medicine Review*. 2012;23(3-4):230-275.
154. Adams KB, C.; van der Heijde, D. M. Safety of pain therapy during pregnancy and lactation in patients with inflammatory arthritis: a systematic literature review. *The Journal of rheumatology Supplement*. 2012;90:59-61.
155. Gentile SG, M. Prenatal exposure to antidepressant medications and neurodevelopmental outcomes: a systematic review. *Journal of affective disorders*. 2011;128(1-2):1-9.
156. Gentile S. Neonatal withdrawal reactions following late in utero exposure to antidepressant medications. *Current Women's Health Reviews*. 2011;7(1):18-27.
157. Fenger-Gron JT, M.; Andersen, K. S.; Nielsen, R. G. Paediatric outcomes following intrauterine exposure to serotonin reuptake inhibitors: a systematic review. *Danish medical bulletin*. 2011;58(9):A4303.
158. Davanzo RC, M.; De Cunto, A.; Minen, F.; Amaddeo, A. Antidepressant drugs and breastfeeding: a review of the literature. *Breastfeeding medicine : the official journal of the Academy of Breastfeeding Medicine*. 2011;6(2):89-98.
159. Dassanayake TM, P.; Carter, G.; Jones, A. Effects of benzodiazepines, antidepressants and opioids on driving: a systematic review and meta-analysis of epidemiological and experimental evidence. *Drug safety*. 2011;34(2):125-156.
160. Berkowitz RIF, A. N. Obesity, psychiatric status, and psychiatric medications. *Psychiatric Clinics of North America*. 2011;34(4):747-764.
161. Barbui C. Getting through the quicksand of the relationship between drugs and suicide. *Drug safety*. 2011;34(5):397-401.
162. Wurst KEP, C.; Ephross, S. A.; Olshan, A. F. First trimester paroxetine use and the prevalence of congenital, specifically cardiac, defects: a meta-analysis of epidemiological studies. *Birth defects research Part A, Clinical and molecular teratology*. 2010;88(3):159-170.
163. Wu QL, J.; Gallegos-Orozco, J. F.; Hentz, J. G. Depression, fracture risk, and bone loss: a meta-analysis of cohort studies. *Osteoporosis international : a journal established as result of cooperation between the European Foundation for Osteoporosis and the National Osteoporosis Foundation of the USA*. 2010;21(10):1627-1635.
164. van Driel JJW, J. H.; Heres, M. H.; Honig, A. [Intrauterine exposure to SSRIs: no reason for routine hypoglycaemia screening]. *Nederlands tijdschrift voor geneeskunde*. 2010;154(8):A339.
165. Udechuku AN, T.; Hill, R.; Szego, K. Antidepressants in pregnancy: a systematic review. *The Australian and New Zealand journal of psychiatry*. 2010;44(11):978-996.
166. Tuccori MM, S.; Testi, A.; Ruggiero, E.; Mantarro, S.; Scollo, C.; Pergola, A.; Fornai, M.; Antonioli, L.; Colucci, R.; Corona, T.; Blandizzi, C. Use of selective serotonin reuptake inhibitors during pregnancy and risk of major and cardiovascular malformations: an update. *Postgraduate medicine*. 2010;122(4):49-65.

167. Simoncelli MM, B. Z.; Berard, A. Antidepressant use during pregnancy: a critical systematic review of the literature. *Current drug safety*. 2010;5(2):153-170.
168. Scialli AR. Paroxetine exposure during pregnancy and cardiac malformations. *Birth defects research Part A, Clinical and molecular teratology*. 2010;88(3):175-177.
169. Kemp AH, Quintana DS, Gray MA, Felmingham KL, Brown K, Gatt JM. Impact of depression and antidepressant treatment on heart rate variability: a review and meta-analysis. *Biological psychiatry*. 2010;67(11):1067-1074.
170. Kölch MP, P.; Allroggen, M.; Fegert, J. M. Does behavioural toxicity of SSRI increased risk for school shootings? *Nervenheilkunde*. 2010;29(7-8):451-455.
171. Kontakioti EB, Z.; Tsiaousi, M.; Mironidou-Tzouveleki, M. Selective serotonin reuptake inhibitors in pregnancy and breastfeeding. *Epitheorese Klinikes Farmakologias kai Farmakokinetikes*. 2010;28(3):249-268.
172. Einarson AK, G. First trimester exposure to paroxetine and prevalence of cardiac defects: Meta-analysis of the literature: Unfortunately incomplete. *Birth defects research Part A, Clinical and molecular teratology*. 2010;88(7):588; author reply 589.
173. Einarson A. Paroxetine use in pregnancy and increased risk of heart defects: Evaluating the evidence. *Canadian family physician Medecin de famille canadien*. 2010;56(8):767-768.
174. Berard A. Paroxetine exposure during pregnancy and the risk of cardiac malformations: what is the evidence? *Birth defects research Part A, Clinical and molecular teratology*. 2010;88(3):171-174.
175. Woolcott JCR, K. J.; Wiens, M. O.; Patel, B.; Marin, J.; Khan, K. M.; Marra, C. A. Meta-analysis of the impact of 9 medication classes on falls in elderly persons. *Archives of internal medicine*. 2009;169(21):1952-1960.
176. Fortinguerra FC, A.; Bonati, M. Psychotropic drug use during breastfeeding: A review of the evidence. *Pediatrics*. 2009;124(4):e547-e556.
177. Bergemann N. Antidepressant use during pregnancy. *Journal fur Neurologie, Neurochirurgie und Psychiatrie*. 2009;10(1):41-47.
178. Taylor D. Antidepressant drugs and cardiovascular pathology: A clinical overview of effectiveness and safety. *Acta psychiatrica Scandinavica*. 2008;118(6):434-442.
179. Sterke CSV, A. P.; van Beeck, E. F.; van der Cammen, T. J. The influence of drug use on fall incidents among nursing home residents: a systematic review. *International psychogeriatrics*. 2008;20(5):890-910.
180. O'Brien LE, T. R.; Sarkar, M.; Einarson, A.; Koren, G. Does paroxetine cause cardiac malformations? *Journal of obstetrics and gynaecology Canada : JOGC = Journal d'obstetrique et gynecologie du Canada : JOGC*. 2008;30(8):696-701.
181. Loke YKT, A. N.; Singh, S. Meta-analysis: gastrointestinal bleeding due to interaction between selective serotonin uptake inhibitors and non-steroidal anti-inflammatory drugs. *Alimentary pharmacology & therapeutics*. 2008;27(1):31-40.
182. Kongkaew CN, P. R.; Ashcroft, D. M. Hospital admissions associated with adverse drug reactions: A systematic review of prospective observational studies. *Annals of Pharmacotherapy*. 2008;42(7-8):1017-1025.
183. Bond DJN, M. M.; Kauer-Sant'Anna, M.; Lam, R. W.; Yatham, L. N. Antidepressant-associated mood elevations in bipolar II disorder compared with bipolar I disorder and major depressive disorder: a systematic review and meta-analysis. *The Journal of clinical psychiatry*. 2008;69(10):1589-1601.
184. Takkouche BM-M, A.; Gill, S. S.; Etminan, M. Psychotropic medications and the risk of fracture: a meta-analysis. *Drug safety*. 2007;30(2):171-184.
185. Howard RL, Avery AJ, Slavenburg S, et al. Which drugs cause preventable admissions to hospital? A systematic review. *British journal of clinical pharmacology*. 2007;63(2):136-147.
186. Hartikainen SL, E.; Louhivuori, K. Medication as a risk factor for falls: critical systematic review. *The journals of gerontology Series A, Biological sciences and medical sciences*. 2007;62(10):1172-1181.
187. Bellantuono CM, G.; Gentile, S. Serotonin reuptake inhibitors in pregnancy and the risk of major malformations: a systematic review. *Human psychopharmacology*. 2007;22(3):121-128.

188. Bar-Oz BE, T.; Einarson, A.; Boskovic, R.; O'Brien, L.; Malm, H.; Berard, A.; Koren, G. Paroxetine and congenital malformations: meta-Analysis and consideration of potential confounding factors. *Clinical therapeutics*. 2007;29(5):918-926.
189. Swenson JRD, S.; Fergusson, D. Adverse cardiovascular events in antidepressant trials involving high-risk patients: a systematic review of randomized trials. *Canadian journal of psychiatry Revue canadienne de psychiatrie*. 2006;51(14):923-929.
190. Sala MC, F.; Cappucciati, C.; Brambilla, P.; d'Allio, G.; Caverzasi, E.; Barale, F.; De Ferrari, G. Antidepressants: Their effects on cardiac channels, QT prolongation and Torsade de Pointes. *Current Opinion in Investigational Drugs*. 2006;7(3):256-263.
191. Rahimi RN, S.; Abdollahi, M. Pregnancy outcomes following exposure to serotonin reuptake inhibitors: a meta-analysis of clinical trials. *Reproductive toxicology (Elmsford, NY)*. 2006;22(4):571-575.
192. McIntyre RSS, J. K.; Konarski, J. Z.; Kennedy, S. H. The effect of antidepressants on lipid homeostasis: a cardiac safety concern? *Expert opinion on drug safety*. 2006;5(4):523-537.
193. McClintock SMH, M. M. Association of suicide in the elderly and SSRI antidepressants: Information from a population-based study. *Aging Health*. 2006;2(6):917-918.
194. Hall WDL, J. How have the selective serotonin reuptake inhibitor antidepressants affected suicide mortality? *The Australian and New Zealand journal of psychiatry*. 2006;40(11-12):941-950.
195. Lattimore KAD, S. M.; Kaciroti, N.; Kemper, A. R.; Neal, C. R., Jr.; Vazquez, D. M. Selective serotonin reuptake inhibitor (SSRI) use during pregnancy and effects on the fetus and newborn: a meta-analysis. *Journal of perinatology : official journal of the California Perinatal Association*. 2005;25(9):595-604.
196. Gentile S. The safety of newer antidepressants in pregnancy and breastfeeding. *Drug safety*. 2005;28(2):137-152.
197. Einarson TRE, A. Newer antidepressants in pregnancy and rates of major malformations: a meta-analysis of prospective comparative studies. *Pharmacoepidemiology and drug safety*. 2005;14(12):823-827.
198. Wen SWW, M. Risk of fetal exposure to tricyclic antidepressants. *Journal of obstetrics and gynaecology Canada : JOGC = Journal d'obstetrique et gynecologie du Canada : JOGC*. 2004;26(10):887-892.
199. Weissman AML, B. T.; Hartz, A. J.; Bentler, S.; Donohue, M.; Ellingrod, V. L.; Wisner, K. L. Pooled analysis of antidepressant levels in lactating mothers, breast milk, and nursing infants. *The American journal of psychiatry*. 2004;161(6):1066-1078.
200. Ramasubbu R. Cerebrovascular effects of selective serotonin reuptake inhibitors: a systematic review. *The Journal of clinical psychiatry*. 2004;65(12):1642-1653.
201. Newman TB. A black-box warning for antidepressants in children? *The New England journal of medicine*. 2004;351(16):1595-1598.
202. McIntosh HMW, N. F.; Bagnall, A. M. Assessing harmful effects in systematic reviews. *BMC medical research methodology*. 2004;4:19.
203. Bailey BB, N. A.; Amre, D. K. A meta-analysis of prognostic indicators to predict seizures, arrhythmias or death after tricyclic antidepressant overdose. *Journal of toxicology Clinical toxicology*. 2004;42(6):877-888.
204. Weinrieb RMA, Marc; Lynch, Kevin G.; Chang, Kyong-Mi; Lewis, James D. A critical review of selective serotonin reuptake inhibitor-associated bleeding: Balancing the risk of treating Hepatitis C-infected patients. *The Journal of clinical psychiatry*. 2003;64(12):1502-1510.
205. Addis AK, G. Safety of fluoxetine during the first trimester of pregnancy: a meta-analytical review of epidemiological studies. *Psychological medicine*. 2000;30(1):89-94.
206. Thase ME. Effects of venlafaxine on blood pressure: a meta-analysis of original data from 3744 depressed patients. *The Journal of clinical psychiatry*. 1998;59(10):502-508.
207. Wilens TEB, Joseph; Baldessarini, Ross J.; Geller, Barbara; Schleifer, David; Spencer, Thomas J.; Birmaher, Boris; Goldblatt, Alan. Cardiovascular effects of therapeutic doses of tricyclic antidepressants in children and adolescents. *Journal of the American Academy of Child & Adolescent Psychiatry*. 1996;35(11):1491-1501.

208. Radua J, Ramella-Cravaro V, Ioannidis JPA, et al. What causes psychosis? An umbrella review of risk and protective factors. *World Psychiatry*. 2018;17(1):49-66.
209. Theodoratou E, Tzoulaki I, Zgaga L, Ioannidis JP. Vitamin D and multiple health outcomes: umbrella review of systematic reviews and meta-analyses of observational studies and randomised trials. *BMJ*. 2014;348:g2035.
210. Raglan O, Kalliala I, Markozannes G, et al. Risk factors for endometrial cancer: An umbrella review of the literature. *Int J Cancer*. 2018.
211. Shea BJ, Reeves BC, Wells G, et al. AMSTAR 2: a critical appraisal tool for systematic reviews that include randomised or non-randomised studies of healthcare interventions, or both. *BMJ*. 2017;358:j4008.
212. Perry R, Leach V, Davies P, Penfold C, Ness A. A comparison of two assessment tools used in overviews of systematic reviews: ROBIS versus AMSTAR. In: *Cochrane Colloquium Abstracts 2018 Edinburgh*. Available at <https://abstracts.cochrane.org/comparison-two-assessment-tools-used-overviews-systematic-reviews-robis-versus-amstar>.
213. Ioannidis JPA. Integration of evidence from multiple meta-analyses: a primer on umbrella reviews, treatment networks and multiple treatments meta-analyses. *CMAJ*. 2009;181(8):488-93. doi: 10.1503/cmaj.08108.
214. Atkins D, Eccles M, Flottorp S, Guyatt GH, Henry D, Hill S, Liberati A, O'Connell D, Oxman AD, Phillips B, Schünemann H, Edejer TT, Vist GE, Williams JW Jr; GRADE Working Group. Systems for grading the quality of evidence and the strength of recommendations I: critical appraisal of existing approaches The GRADE Working Group. *BMC Health Serv Res*. 2004;4(1):38.
215. Morales DR, Slattery J, Evans S, Kurz X. Antidepressant use during pregnancy and risk of autism spectrum disorder and attention deficit hyperactivity disorder: systematic review of observational studies and methodological considerations. *BMC Med*. 2018 Jan 15;16(1):6.
